# Supplementary material for: Optimization and comparison of statistical tools for the prediction of multicomponent forms of a molecule: the antiretroviral nevirapine as a case study
Source: Royal Society of Chemistry journal article supplement (doi:10.1039/d0ce00948b), 2020-01-01
Supplement: d0ce00948b1.pdf [file d0ce00948b1.pdf]

## Optimization and comparison of statistical tools for the prediction of multicomponent forms of a molecule: the antiretroviral Nevirapine as a case study

Rogeria Nunes Costa,<sup>\*a</sup> Duane Choquesillo-Lazarte,<sup>b</sup> Silvia Lucía Cuffini,<sup>a</sup> Elna Pidcock,<sup>c</sup> and Lourdes Infantes<sup>\*d</sup>

<sup>a</sup> Instituto de Ciência e Tecnologia, Universidade Federal de São Paulo, 12331-280 São José dos Campos, Brazil.

<sup>b</sup> Laboratorio de Estudios Cristalográficos, IACT, CSIC-Universidad de Granada, Avda. de las Palmeras 4, 18100 Armilla, Granada, Spain.

<sup>c</sup> Cambridge Crystallographic Data Centre, 12 Union Road, Cambridge, UK.

<sup>d</sup> Instituto de Química Física Rocasolano, Consejo Superior de Investigaciones Científicas, 28006, Madrid, Spain.

### Supplementary information

#### Content:

*Table S1 – List of all compounds with the 2D diagram tested with NVP to form multicomponents, grouping in G1 (green), G2 (yellow) and G3 (red). Ranking positions obtained through the techniques used for all of them are shown. Each group has been sorted by the consensus C score.*

*Table S2 – Experimental methods used in the trials to form NVP multicomponents for compounds in the groups G2 and G3. A description of each method is given below.*

*Table S3 – H-Bond Propensity results for a multicomponent analysis of 450 co-formers against NVP molecule. Molecules are ordered by HBP ranking position. In bold are represented the 76 molecules for which experimental multicomponent results are available. Black-italic letter identify the positive results; <sup>CSD</sup> means molecules reported in the CSD database. Red-underline letter identify the negative results.*

*Table S4 – Coordination value results for a multicomponent analysis of 450 co-formers against NVP molecule. Molecules are ordered by CV ranking position. In bold are represented the 76 molecules for which experimental multicomponent results are available. Black-italic letter identify the positive results; <sup>CSD</sup> means molecules reported in the CSD database. Red-underline letter identify the negative results.*

*Table S5 – Molecular complementarity results for a multicomponent analysis of 450 co-formers against NVP molecule. Molecules are ordered by MC ranking position. In bold are represented the 76 molecules for which experimental multicomponent results are available. Black-italic letter identify the positive results; <sup>CSD</sup> means molecules reported in the CSD database. Red-underline letter identify the negative results.*

*Table S56 – COSMOQuick results for a multicomponent analysis of 450 co-formers against NVP molecule. Molecules are ordered by COSMO ranking position. In bold are represented the 76 molecules for which experimental multicomponent results are available. Black-italic letter identify the positive results; <sup>CSD</sup> means molecules reported in the CSD database. Red-underline letter identify the negative results.*

*Table S7 – Scores and Ranking obtained for CV, MC, HBP, COSMOQuick and the three consensus ranking A, B and C for the multicomponent analysis of 450 co-formers against NVP molecule. The co-formers were ordered by the consensus ranking C, obtained from the sum of ranking positions obtained for MC, HBP analysis, and CosmoQuick prediction. In bold are represented the 76 molecules for which experimental multicomponent results are available. Black-italic letter identify the positive results; <sup>CSD</sup> means molecules reported in the CSD database. Red-underline letter identify the negative results.*

*Table S8 – Distribution of some frequent chemical groups in the database of 450 structures used in the theoretical screening and in the 76 molecules tested to form multicomponent with NVP.*

Figure S1 –ROC curves and AUC values obtained for each method: CV, MC, HBP, COSMOQuick, and the three consensus A, B and C.

Table S1 – List of all compounds with the 2D diagram tested with NVP to form multicomponents, grouping in G1 (green), G2 (yellow) and G3 (red). Ranking positions obtained through the techniques used for all of them are shown. Each group has been sorted by the consensus C score.

| Co-former                         | CV ranking | MC ranking | HBP ranking | Consensus Ranking A | COSMO ranking | Consensus ranking B | Consensus ranking C | 2D diagram |
|-----------------------------------|------------|------------|-------------|---------------------|---------------|---------------------|---------------------|------------|
| Maleic Acid                       | 73         | 158        | 33          | 29                  | 42            | 5                   | 10                  |            |
| 4-Hydroxybenzoic acid             | 56         | 85         | 117         | 24                  | 32            | 4                   | 11                  |            |
| Salicylic acid                    | 109        | 121        | 90          | 44                  | 30            | 11                  | 13                  |            |
| Ethanol                           | 222        | 234        | 65          | 126                 | 134           | 97                  | 61                  |            |
| Glutaric acid                     | 84         | 93         | 67          | 21                  | 279           | 51                  | 66                  |            |
| Trichloroacetic acid**            | 235        | 372        | 69          | 201                 | 10            | 113                 | 76                  |            |
| Naphthalene-1,5-disulfonic acid** | 317        | 201        | 225         | 252                 | 26            | 155                 | 77                  |            |
| 3,5-Dinitrosalicylic acid**       | 364        | 272        | 206         | 328                 | 22            | 180                 | 98                  |            |
| n-Butanol                         | 170        | 83         | 153         | 78                  | 291           | 120                 | 122                 |            |
| Tartaric acid                     | 75         | 348        | 110         | 132                 | 72            | 74                  | 126                 |            |
| Ethyl acetate                     | 339        | 124        | 185         | 183                 | 246           | 198                 | 149                 |            |
| Hexanol                           | 155        | 40         | 164         | 60                  | 365           | 138                 | 158                 |            |
| 1,4-Dioxane                       | 371        | 323        | 97          | 292                 | 150           | 223                 | 161                 |            |
| Heptanol                          | 147        | 29         | 163         | 54                  | 386           | 139                 | 163                 |            |
| Octanol                           | 140        | 21         | 168         | 48                  | 395           | 137                 | 167                 |            |
| Saccharin                         | 406        | 337        | 202         | 388                 | 71            | 274                 | 185                 |            |

|                                       |     |     |     |     |     |     |     |                                                                                       |
|---------------------------------------|-----|-----|-----|-----|-----|-----|-----|---------------------------------------------------------------------------------------|
| Picric acid**                         | 435 | 293 | 262 | 410 | 69  | 300 | 193 | 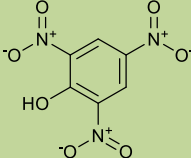   |
| 1,3-Diiodobenzene                     | 264 | 51  | 427 | 251 | 156 | 202 | 197 |    |
| Dichloromethane                       | 226 | 115 | 444 | 285 | 98  | 190 | 215 |    |
| 1,2,4,5-Tetrafluoro-3,6-diiodobenzene | 248 | 39  | 434 | 231 | 249 | 238 | 255 |    |
| Toluene*                              | 224 | 75  | 450 | 257 | 212 | 233 | 267 |    |
| ε-Caprolactam                         | 230 | 336 | 328 | 363 | 126 | 276 | 306 |    |
| Benzoic acid                          | 161 | 72  | 51  | 35  | 57  | 9   | 2   |    |
| 3-Hydroxybenzoic acid                 | 52  | 128 | 75  | 23  | 29  | 3   | 9   |   |
| Gentisic acid                         | 64  | 136 | 162 | 62  | 20  | 21  | 27  |  |
| 4-Aminobenzoic acid                   | 108 | 81  | 38  | 16  | 97  | 7   | 5   |  |
| Fumaric acid                          | 181 | 123 | 66  | 67  | 40  | 26  | 8   |  |
| Cinnamic acid                         | 190 | 44  | 76  | 40  | 175 | 43  | 23  |  |
| Gallic acid                           | 276 | 233 | 138 | 181 | 16  | 101 | 44  |  |
| Adipic acid                           | 66  | 69  | 32  | 8   | 330 | 44  | 59  |  |
| L-Mandelic acid                       | 88  | 270 | 141 | 119 | 47  | 60  | 78  |  |
| Oxalic acid                           | 153 | 248 | 305 | 222 | 4   | 130 | 150 |  |

|                      |     |     |     |     |     |     |     |                                                                                       |
|----------------------|-----|-----|-----|-----|-----|-----|-----|---------------------------------------------------------------------------------------|
| Malonic acid         | 114 | 257 | 189 | 140 | 133 | 116 | 164 | 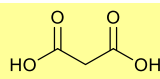   |
| Citric acid          | 96  | 301 | 63  | 98  | 229 | 114 | 174 |    |
| Theophylline         | 389 | 249 | 229 | 347 | 147 | 272 | 195 |    |
| Sorbic acid          | 174 | 55  | 384 | 165 | 187 | 160 | 196 |    |
| Uracil               | 296 | 275 | 236 | 299 | 164 | 241 | 227 |    |
| Caffeine             | 436 | 225 | 365 | 422 | 155 | 382 | 272 |    |
| Propionamide         | 8   | 247 | 242 | 116 | 264 | 152 | 279 |    |
| L-Proline            | 203 | 296 | 318 | 310 | 228 | 291 | 344 |   |
| Urea                 | 145 | 350 | 279 | 280 | 236 | 269 | 357 |  |
| Glutamic acid        | 85  | 442 | 326 | 335 | 378 | 396 | 448 |  |
| Hydroquinone         | 115 | 90  | 165 | 68  | 17  | 23  | 18  |  |
| Phloroglucinol       | 213 | 188 | 143 | 134 | 3   | 61  | 32  |  |
| Resorcinol           | 116 | 173 | 181 | 106 | 5   | 38  | 37  |  |
| Catechol             | 137 | 197 | 160 | 113 | 9   | 45  | 39  |  |
| Acetylsalicylic acid | 271 | 231 | 31  | 131 | 137 | 104 | 48  |  |
| Orcinol              | 113 | 230 | 169 | 122 | 12  | 52  | 50  |  |
| Glycolic acid        | 124 | 313 | 86  | 128 | 64  | 73  | 81  |  |

|                 |     |     |     |     |     |     |     |                                                                                       |
|-----------------|-----|-----|-----|-----|-----|-----|-----|---------------------------------------------------------------------------------------|
| L-Malic acid    | 49  | 291 | 102 | 91  | 75  | 48  | 84  | 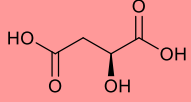   |
| Succinic acid   | 141 | 312 | 68  | 127 | 94  | 81  | 87  |    |
| L-Tartaric acid | 71  | 384 | 18  | 107 | 73  | 59  | 89  |    |
| Ferulic acid    | 45  | 138 | 100 | 34  | 255 | 58  | 96  |    |
| Suberic acid    | 47  | 35  | 78  | 7   | 391 | 64  | 102 |    |
| L-Ascorbic acid | 177 | 342 | 77  | 157 | 88  | 110 | 108 |    |
| DL-Malic acid   | 16  | 297 | 147 | 99  | 76  | 56  | 120 |    |
| Nicotinic acid  | 358 | 112 | 320 | 290 | 100 | 196 | 130 |   |
| Stearic acid    | 106 | 1   | 92  | 11  | 444 | 93  | 138 |  |
| Orotic acid     | 260 | 212 | 277 | 256 | 54  | 162 | 144 |  |
| Cinnamamide     | 4   | 80  | 252 | 51  | 287 | 83  | 190 |  |
| Benzamide       | 58  | 117 | 259 | 88  | 243 | 107 | 191 |  |
| Vanillin        | 243 | 215 | 297 | 265 | 139 | 199 | 209 |  |
| Hippuric acid   | 55  | 171 | 187 | 82  | 301 | 131 | 216 |  |
| Nicotinamide    | 312 | 113 | 296 | 228 | 265 | 251 | 226 |  |

|                   |     |     |     |     |     |     |     |                                                                                       |
|-------------------|-----|-----|-----|-----|-----|-----|-----|---------------------------------------------------------------------------------------|
| Theobromine       | 423 | 220 | 311 | 395 | 168 | 346 | 241 | 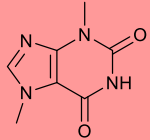   |
| Isonicotinamide   | 319 | 131 | 337 | 287 | 257 | 290 | 260 |    |
| Piperazine        | 274 | 318 | 263 | 337 | 160 | 273 | 269 |    |
| L-Arginine        | 408 | 203 | 150 | 268 | 413 | 377 | 286 |    |
| Pyroglutamic acid | 225 | 277 | 364 | 346 | 140 | 266 | 297 |    |
| Succinamide       | 83  | 160 | 270 | 123 | 358 | 186 | 304 |    |
| L-Aspartic acid   | 14  | 263 | 317 | 156 | 238 | 169 | 326 |    |
| DL-Aspartic acid  | 130 | 411 | 325 | 344 | 239 | 327 | 403 |   |
| Glycine           | 301 | 430 | 302 | 423 | 293 | 427 | 416 |  |
| L-Alanine         | 232 | 448 | 338 | 419 | 289 | 422 | 424 |  |
| L-Valine          | 217 | 433 | 354 | 413 | 323 | 428 | 437 |  |
| L-Glutamine       | 22  | 429 | 340 | 293 | 394 | 384 | 449 |  |

Table S2 – Experimental methods used in the trials to form NVP multicomponents for compounds in the groups G2 and G3. A description of each method is given below.

| Co-formers          | Experimental techniques used                                                                                                                                        |
|---------------------|---------------------------------------------------------------------------------------------------------------------------------------------------------------------|
| G2                  |                                                                                                                                                                     |
| 4-Aminobenzoic acid | LAG method using magnetic stirrer.<br>LAG method using manual grinding.<br><sup>1</sup> Nalte et al. has obtained the co-crystal by using the neat grinding method. |
| Fumaric acid        | LAG method using magnetic stirrer.<br><sup>2</sup> Caira et al. has employed dry co-grinding and LAG methods, and obtained the co-crystal.                          |
| Cinnamic acid       | <sup>1</sup> Nalte et al. has obtained the co-crystal by using the neat grinding method.                                                                            |
| Gallic acid         | LAG method applying high energy.<br><sup>1</sup> Nalte et al. has obtained the co-crystal by using the neat grinding method.                                        |

|                      |                                                                                                                                                                                                                                                                                                                                                                                                                                                                                                                                         |
|----------------------|-----------------------------------------------------------------------------------------------------------------------------------------------------------------------------------------------------------------------------------------------------------------------------------------------------------------------------------------------------------------------------------------------------------------------------------------------------------------------------------------------------------------------------------------|
| Adipic acid          | LAG method using magnetic stirrer.<br>LAG method using manual grinding.<br><sup>2</sup> Caira et al. has obtained the co-crystal by using the LAG method.                                                                                                                                                                                                                                                                                                                                                                               |
| L-Mandelic acid      | <sup>1</sup> Nalte et al. has obtained the co-crystal by using the neat grinding method.                                                                                                                                                                                                                                                                                                                                                                                                                                                |
| Oxalic acid          | LAG method applying high energy.<br>LAG method applying low energy.<br>LAG method using magnetic stirrer.<br>LAG method using manual grinding.<br><sup>3</sup> Gujar et al. has obtained the co-crystal by using the solution crystallization method, dissolving equimolar quantities of NVP and oxalic acid in acetone.<br><sup>1</sup> Nalte et al. has obtained the co-crystal by using the neat grinding method.<br><sup>2</sup> Caira et al. has employed slow evaporation, neat grinding, solvent-drop grinding, and LAG methods. |
| Malonic acid         | LAG method using magnetic stirrer.<br>LAG method using manual grinding.<br><sup>1</sup> Nalte et al. has obtained the co-crystal by using the neat grinding method.<br><sup>2</sup> Caira et al. has employed LAG method.                                                                                                                                                                                                                                                                                                               |
| Citric acid          | LAG method applying high energy.<br>LAG method applying low energy.<br>LAG method using manual grinding.<br><sup>1</sup> Nalte et al. has obtained the co-crystal by using the neat grinding method.<br><sup>2</sup> Caira et al. has employed slow-evaporation and solvent-drop grinding methods.                                                                                                                                                                                                                                      |
| Theophylline         | LAG method applying low energy. An eutectic was obtained.                                                                                                                                                                                                                                                                                                                                                                                                                                                                               |
| Sorbic acid          | <sup>2</sup> Caira et al. obtained the co-crystal by using dry co-grinding and LAG methods.                                                                                                                                                                                                                                                                                                                                                                                                                                             |
| Uracil               | <sup>2</sup> Caira et al. has obtained the co-crystal by using the LAG method.                                                                                                                                                                                                                                                                                                                                                                                                                                                          |
| Caffeine             | LAG method applying low energy. An eutectic was obtained.                                                                                                                                                                                                                                                                                                                                                                                                                                                                               |
| Propionamide         | <sup>2</sup> Caira et al. has obtained the co-crystal by using the LAG method.                                                                                                                                                                                                                                                                                                                                                                                                                                                          |
| L-Proline            | <sup>2</sup> Caira et al. has obtained the co-crystal by using the LAG method.                                                                                                                                                                                                                                                                                                                                                                                                                                                          |
| Urea                 | LAG method applying low energy.<br>LAG method using manual grinding.<br><sup>1</sup> Nalte et al. has obtained the co-crystal by using the neat grinding method.                                                                                                                                                                                                                                                                                                                                                                        |
| Glutamic acid        | LAG method using manual grinding.<br><sup>2</sup> Caira et al. has obtained the co-crystal by using dry co-grinding and LAG methods.                                                                                                                                                                                                                                                                                                                                                                                                    |
| <b>G3</b>            |                                                                                                                                                                                                                                                                                                                                                                                                                                                                                                                                         |
| Hydroquinone         | LAG method applying high energy.                                                                                                                                                                                                                                                                                                                                                                                                                                                                                                        |
| Phloroglucinol       | LAG method applying high energy.                                                                                                                                                                                                                                                                                                                                                                                                                                                                                                        |
| Resorcinol           | LAG method applying high energy.                                                                                                                                                                                                                                                                                                                                                                                                                                                                                                        |
| Catechol             | LAG method applying high energy.                                                                                                                                                                                                                                                                                                                                                                                                                                                                                                        |
| Acetylsalicylic acid | LAG method using magnetic stirrer.<br>LAG method using manual grinding.                                                                                                                                                                                                                                                                                                                                                                                                                                                                 |
| Orcinol              | LAG method applying high energy.                                                                                                                                                                                                                                                                                                                                                                                                                                                                                                        |
| Glycolic acid        | LAG method using manual grinding.                                                                                                                                                                                                                                                                                                                                                                                                                                                                                                       |
| L-Malic acid         | LAG method applying low energy.<br><sup>2</sup> Caira et al. has employed dry co-grinding and LAG methods.                                                                                                                                                                                                                                                                                                                                                                                                                              |
| Succinic acid        | LAG method using magnetic stirrer.<br><sup>2</sup> Caira et al. has employed slow-evaporation, neat grinding, solvent-drop grinding, and LAG methods.                                                                                                                                                                                                                                                                                                                                                                                   |
| L-Tartaric acid      | LAG method using magnetic stirrer.<br>LAG method using manual grinding.<br><sup>1</sup> Nalte et al. has employed the neat grinding method.<br><sup>2</sup> Caira et al. has employed slow-evaporation, neat grinding, solvent-drop grinding and LAG methods.                                                                                                                                                                                                                                                                           |
| Ferulic acid         | <sup>1</sup> Nalte et al. has employed the neat grinding method.                                                                                                                                                                                                                                                                                                                                                                                                                                                                        |
| Suberic acid         | <sup>2</sup> Caira et al. has employed the LAG method.                                                                                                                                                                                                                                                                                                                                                                                                                                                                                  |
| L-Ascorbic acid      | LAG method using magnetic stirrer.<br><sup>2</sup> Caira et al. has employed the LAG method.                                                                                                                                                                                                                                                                                                                                                                                                                                            |

|                   |                                                                                                                                                                                                       |
|-------------------|-------------------------------------------------------------------------------------------------------------------------------------------------------------------------------------------------------|
| DL-Malic acid     | LAG method using magnetic stirrer.<br>LAG method using manual grinding.                                                                                                                               |
| Nicotinic acid    | LAG method using magnetic stirrer.<br>LAG method using manual grinding.<br><sup>2</sup> Caira et al. has employed the LAG method.                                                                     |
| Stearic acid      | <sup>2</sup> Caira et al. has employed slow-evaporation, neat grinding, and solvent-drop grinding methods.                                                                                            |
| Orotic acid       | <sup>2</sup> Caira et al. has employed the LAG method.                                                                                                                                                |
| Cinnamamide       | <sup>2</sup> Caira et al. has employed the LAG method.                                                                                                                                                |
| Benzamide         | LAG method using manual grinding.<br><sup>2</sup> Caira et al. has employed the LAG method.                                                                                                           |
| Vanillin          | LAG method using manual grinding.                                                                                                                                                                     |
| Hippuric acid     | LAG method using magnetic stirrer.<br>LAG method using manual grinding.<br><sup>1</sup> Nalte et al. has employed the neat grinding method.<br><sup>2</sup> Caira et al. has employed the LAG method. |
| Nicotinamide      | LAG method using manual grinding.<br><sup>2</sup> Caira et al. has employed slow-evaporation, neat grinding, solvent-drop grinding, and LAG methods.                                                  |
| Theobromine       | LAG method applying low energy.                                                                                                                                                                       |
| Isonicotinamide   | LAG method using manual grinding.<br><sup>2</sup> Caira et al. has employed slow-evaporation, neat grinding, solvent-drop grinding, and LAG methods.                                                  |
| Piperazine        | <sup>2</sup> Caira et al. has employed the LAG method.                                                                                                                                                |
| L-Arginine        | LAG method using manual grinding.<br><sup>2</sup> Caira et al. has employed the LAG method.                                                                                                           |
| Pyroglutamic acid | <sup>2</sup> Caira et al. has employed the LAG method.                                                                                                                                                |
| Succinamide       | <sup>2</sup> Caira et al. has employed the LAG method.                                                                                                                                                |
| L-Aspartic acid   | LAG method using manual grinding.<br><sup>2</sup> Caira et al. has employed slow-evaporation and solvent-drop grinding methods.                                                                       |
| DL-Aspartic acid  | <sup>2</sup> Caira et al. has employed slow-evaporation and solvent-drop grinding methods.                                                                                                            |
| Glycine           | <sup>2</sup> Caira et al. has employed the LAG method.                                                                                                                                                |
| L-Alanine         | LAG method using manual grinding.                                                                                                                                                                     |
| L-Valine          | <sup>2</sup> Caira et al. has employed the LAG method.                                                                                                                                                |
| L-Glutamine       | LAG method using manual grinding.                                                                                                                                                                     |

Techniques that we have used for the liquid assisted grinding (LAG):

- 1) **LAG method applying high energy:** By using the mixer mill MM200 (Retsch), 150 mg of stoichiometric (1:1) amounts of NVP and coformer were ground in the presence of 4 or 5 drops of chloroform. The sample mixture and the solvent were placed in an agate jar with two steel balls ( $\Phi = 5$  mm) and maintained under 25 HZ of vibrational frequency, during 30 minutes, and at room temperature. The solvent was evaporated at room temperature.
- 2) **LAG method applying low energy:** 3 mmol of NVP and 3 mmol of coformer were ground in the presence of 1000  $\mu$ L of chloroform. The sample mixture and the solvent were placed in a glass tube with 4 steel balls ( $\Phi = 5$  mm) and 8 steel balls ( $\Phi = 3$  mm). The glass tubes were mounted in a system using a PVC tube and polystyrene foam to keep the tubes immobilized. The system (PVC tube + polystyrene foam + tubes) was put in a roller mill and it was maintained under rotation frequency of 270 rpm, during 24 hours, and at room temperature. The solvent was evaporated at room temperature.
- 3) **LAG method using magnetic stirrer:** 0.3 mmol of NVP and 0.3 mmol of coformer were ground in the presence of 300  $\mu$ L of solvent (acetone or chloroform). The sample mixture and the solvent were placed in a glass tube with a magnetic bar. The system was let under agitation in a magnetic stirrer, at low agitation, during 2 hours, and at room temperature. The solvent was evaporated at room temperature.
- 4) **LAG method using manual grinding:** 150 mg of stoichiometric (1:1) amounts of NVP and coformer were manually ground in the presence of 4 or 5 drops of chloroform in an agate mortar.



Techniques used by other authors:

- 5) <sup>1</sup>Nalte et al. has applied the **neat grinding method**. Stoichiometric ratios of NVP and co-former were ground in a mortar pestle by manual grinding during 20 minutes.
- 6) <sup>2</sup>Caira et al. has employed a series of experiments using different methods:
  - a. **Slow-evaporation method** using stoichiometric ratios (1:1 and 1:2) and various solvents.
  - b. **Neat-grinding** (manual grinding) method using NVP-co-former stoichiometric ratios 1:1 and 2:1.
  - c. **Solvent-drop grinding** (manual grinding) method using NVP-co-former stoichiometric ratios 1:1 and 2:1, and different solvents.
  - d. **Dry co-grinding** method using 1:1 stoichiometric ratio.
  - e. **Liquid-assisted grinding (LAG)** method using various solvents and different stoichiometric ratios (1:1, 2:1, and 1:3).
- 7) <sup>3</sup>Gujar et al. has applied the **solution crystallization method**. Equimolar quantities of NVP and co-former were dissolved in 110 ml of acetone and were kept in a warm bath (40 °C). After, the solution was let to crystallize for 1 hour.

References:

- 1 Y. K. Nalte, V. A. Arsul, S. G. Shep and S. B. Bothara, *J. Pharm. Res.*, 2015, **9**, 556–561.
- 2 M. R. Caira, S. A. Bourne, H. Samsodien, E. Engel, W. Liebenberg, N. Stieger and M. Aucamp, *CrystEngComm*, 2012, **14**, 2541–2551.
- 3 P. P. Gujar, A. A. Kokil, P. S. Karekar, Y. A. Gurav and A. V. Yadav, *Int. J. Pharm. Technol.*, 2013, **4**, 4831–4842.

Table S3 –H-Bond Propensity results for a multicomponent analysis of 450 co-formers against NVP molecule. Molecules are ordered by HBP ranking position. In bold are represented the 76 molecules for which experimental multicomponent results are available. Black-italic letter identify the positive results; CSD means molecules reported in the CSD database. Red-underline letter identify the negative results.

| Co-former                                                   | Molecular formula | HBP Multicomponent Score | Max Interaction | Max A:B or B:A propensity | Max A:A propensity | Max B:B propensity | HBP ranking |
|-------------------------------------------------------------|-------------------|--------------------------|-----------------|---------------------------|--------------------|--------------------|-------------|
| 1,2-Ethanedithiol                                           | C2H6S2            | 0.48                     | B:A             | 0.93                      | 0.46               | 0.43               | 1           |
| 1,8-Octanedithiol                                           | C8H18S2           | 0.47                     | B:A             | 0.93                      | 0.46               | 0.34               | 2           |
| 1,3-Propanedithiol                                          | C3H8S2            | 0.46                     | B:A             | 0.91                      | 0.45               | 0.36               | 3           |
| 1,6-Hexanedithiol                                           | C6H14S2           | 0.44                     | B:A             | 0.91                      | 0.46               | 0.30               | 4           |
| 1,9-Nonanedithiol                                           | C9H20S2           | 0.44                     | B:A             | 0.90                      | 0.46               | 0.30               | 5           |
| D-(+)-chiro-Inositol                                        | C6H12O6           | 0.43                     | B:A             | 0.88                      | 0.46               | 0.44               | 6           |
| Pyrrole                                                     | C4H5N             | 0.43                     | B:A             | 0.86                      | 0.43               |                    | 7           |
| cis-Inositol                                                | C6H12O6           | 0.42                     | B:A             | 0.87                      | 0.45               | 0.45               | 8           |
| L-chiro-Inositol                                            | C6H12O6           | 0.41                     | B:A             | 0.85                      | 0.43               | 0.44               | 9           |
| Betaine                                                     | C5H10NO2          | 0.39                     | A:B             | 0.81                      | 0.42               |                    | 10          |
| Scyllo-inositol                                             | C6H12O6           | 0.38                     | B:A             | 0.85                      | 0.47               | 0.45               | 11          |
| epi-Inositol                                                | C6H12O6           | 0.38                     | B:A             | 0.86                      | 0.48               | 0.44               | 12          |
| neo-Inositol                                                | C6H12O6           | 0.37                     | B:A             | 0.82                      | 0.45               | 0.44               | 13          |
| 2,4-Dihydroxybenzoic acid                                   | C7H6O4            | 0.35                     | B:A             | 0.72                      | 0.38               | 0.23               | 14          |
| Cyclohexane-1,2,3,4,5,6-hexol                               | C6H12O6           | 0.35                     | B:A             | 0.80                      | 0.44               | 0.45               | 15          |
| 1,7,7-Trimethyltricyclo(2.2.1.0 <sup>2,6</sup> )heptan-4-ol | C10H16O           | 0.33                     | B:A             | 0.82                      | 0.49               | 0.27               | 16          |
| Isocaryolan-9 $\alpha$ -ol                                  | C15H26O           | 0.33                     | B:A             | 0.79                      | 0.46               | 0.34               | 17          |
| <b>L-Tartaric acid</b>                                      | <b>C4H6O6</b>     | <b>0.31</b>              | <b>B:A</b>      | <b>0.76</b>               | <b>0.38</b>        | <b>0.44</b>        | <b>18</b>   |
| Meso-Tartaric acid                                          | C4H6O6            | 0.31                     | B:A             | 0.76                      | 0.37               | 0.45               | 19          |
| N,N-Dimethylformamide                                       | C3H7NO            | 0.31                     | A:B             | 0.71                      | 0.40               |                    | 20          |
| 2-Amino-5-methylbenzoic acid                                | C8H9NO2           | 0.30                     | B:A             | 0.76                      | 0.43               | 0.46               | 21          |
| 2-Amino-5-picolinic acid                                    | C6H6N2O2          | 0.30                     | B:A             | 0.82                      | 0.40               | 0.52               | 22          |

|                                    |                |             |            |             |             |             |           |
|------------------------------------|----------------|-------------|------------|-------------|-------------|-------------|-----------|
| 2-Acetylpyrrole                    | C6H7NO         | 0.29        | B:A        | 0.72        | 0.42        | 0.44        | 23        |
| 3-Methylbut-2-enoic acid           | C5H8O2         | 0.29        | B:A        | 0.78        | 0.49        | 0.48        | 24        |
| DL-Ribose                          | C5H10O5        | 0.29        | B:A        | 0.83        | 0.52        | 0.54        | 25        |
| 2,6-Dimethylpyrazine               | C6H8N2         | 0.28        | A:B        | 0.65        | 0.37        |             | 26        |
| Anthranilic acid                   | C7H7NO2        | 0.28        | B:A        | 0.78        | 0.39        | 0.50        | 27        |
| cis-Aconitic acid                  | C6H6O6         | 0.28        | B:A        | 0.70        | 0.42        | 0.42        | 28        |
| o-Anisic acid                      | C8H8O3         | 0.28        | B:A        | 0.64        | 0.36        | 0.30        | 29        |
| Tramadol                           | C16H25NO2      | 0.28        | B:A        | 0.70        | 0.42        | 0.17        | 30        |
| <b>Acetylsalicylic acid</b>        | <b>C9H8O4</b>  | <b>0.27</b> | <b>B:A</b> | <b>0.70</b> | <b>0.43</b> | <b>0.31</b> | <b>31</b> |
| <b>Adipic acid</b>                 | <b>C10H18</b>  | <b>0.27</b> | <b>B:A</b> | <b>0.73</b> | <b>0.47</b> | <b>0.41</b> | <b>32</b> |
| <b>Maleic Acid<sup>CSD</sup></b>   | <b>C4H4O4</b>  | <b>0.27</b> | <b>B:A</b> | <b>0.69</b> | <b>0.43</b> | <b>0.41</b> | <b>33</b> |
| Tetrahydrofuran                    | C4H8O          | 0.27        | A:B        | 0.67        | 0.40        |             | 34        |
| 1,4-Phenylenediamine               | C6H8N2         | 0.26        | B:A        | 0.73        | 0.46        | 0.10        | 35        |
| Allocinnamic acid                  | C9H8O2         | 0.26        | B:A        | 0.75        | 0.50        | 0.40        | 36        |
| D-Glucitol                         | C6H14O6        | 0.26        | B:A        | 0.72        | 0.42        | 0.46        | 37        |
| <b>4-Aminobenzoic acid</b>         | <b>C7H7NO2</b> | <b>0.26</b> | <b>B:A</b> | <b>0.81</b> | <b>0.38</b> | <b>0.55</b> | <b>38</b> |
| Phenoxyacetic acid                 | C8H8O3         | 0.26        | B:A        | 0.72        | 0.46        | 0.47        | 39        |
| Cyclohexane-1,4-diamine            | C6H14N2        | 0.25        | B:A        | 0.71        | 0.41        | 0.46        | 40        |
| 3,3'-Thiodipropionic acid          | C6H10O4S       | 0.25        | B:A        | 0.75        | 0.43        | 0.49        | 41        |
| D-Glucono-1,5-lactone              | C6H10O6        | 0.25        | B:A        | 0.72        | 0.47        | 0.43        | 42        |
| Formic acid                        | CH2O2          | 0.25        | B:A        | 0.67        | 0.36        | 0.42        | 43        |
| Lactic acid                        | C3H6O3         | 0.25        | B:A        | 0.80        | 0.44        | 0.55        | 44        |
| Linoleic acid                      | C18H32O2       | 0.25        | B:A        | 0.75        | 0.44        | 0.49        | 45        |
| Ribitol                            | C5H12O5        | 0.25        | B:A        | 0.76        | 0.51        | 0.50        | 46        |
| (1R,2R)-Cyclohexane-1,2-Diamine    | C6H14N2        | 0.25        | B:A        | 0.78        | 0.53        | 0.50        | 47        |
| DL-Mannitol                        | C6H14O6        | 0.24        | B:A        | 0.68        | 0.38        | 0.43        | 48        |
| 4-Methoxybenzoic acid              | C8H8O3         | 0.24        | B:A        | 0.71        | 0.47        | 0.45        | 49        |
| Pyrazine-1,4-dioxide               | C4H4N2O2       | 0.24        | A:B        | 0.65        | 0.41        |             | 50        |
| <b>Benzoic acid<sup>CSD</sup></b>  | <b>C7H6O2</b>  | <b>0.23</b> | <b>B:A</b> | <b>0.71</b> | <b>0.45</b> | <b>0.48</b> | <b>51</b> |
| D-Iditol                           | C6H14O6        | 0.23        | B:A        | 0.69        | 0.46        | 0.46        | 52        |
| DL-Arabinitol                      | C5H12O5        | 0.23        | B:A        | 0.71        | 0.44        | 0.48        | 53        |
| Methyl paraben                     | C8H8O3         | 0.23        | B:A        | 0.65        | 0.43        | 0.35        | 54        |
| Pyrimethamine                      | C12H13ClN4     | 0.23        | B:A        | 0.83        | 0.48        | 0.60        | 55        |
| Tromethamine                       | C4H11NO3       | 0.23        | B:A        | 0.69        | 0.44        | 0.46        | 56        |
| Xylitol                            | C5H12O5        | 0.23        | B:A        | 0.72        | 0.49        | 0.49        | 57        |
| α-D-Tagatopyranose                 | C5H6O3         | 0.23        | B:A        | 0.79        | 0.49        | 0.55        | 58        |
| α-L-Sorbopyranose                  | C6H12O6        | 0.23        | B:A        | 0.83        | 0.51        | 0.59        | 59        |
| Acetic acid                        | C2H4O2         | 0.22        | B:A        | 0.75        | 0.47        | 0.54        | 60        |
| Allitol                            | C6H14O6        | 0.22        | B:A        | 0.68        | 0.43        | 0.46        | 61        |
| Cholic acid                        | C24H40O5       | 0.22        | B:A        | 0.77        | 0.43        | 0.55        | 62        |
| <b>Citric acid</b>                 | <b>C6H8O7</b>  | <b>0.22</b> | <b>B:A</b> | <b>0.61</b> | <b>0.40</b> | <b>0.36</b> | <b>63</b> |
| l-Iditol                           | C6H14O6        | 0.22        | B:A        | 0.72        | 0.50        | 0.47        | 64        |
| <b>Ethanol<sup>CSD</sup></b>       | <b>C2H5OH</b>  | <b>0.22</b> | <b>B:A</b> | <b>0.57</b> | <b>0.41</b> | <b>0.35</b> | <b>65</b> |
| <b>Fumaric acid</b>                | <b>C4H4O4</b>  | <b>0.22</b> | <b>B:A</b> | <b>0.76</b> | <b>0.48</b> | <b>0.53</b> | <b>66</b> |
| <b>Glutaric acid<sup>CSD</sup></b> | <b>C5H8O4</b>  | <b>0.22</b> | <b>B:A</b> | <b>0.79</b> | <b>0.51</b> | <b>0.57</b> | <b>67</b> |
| <b>Succinic acid</b>               | <b>C4H6O4</b>  | <b>0.22</b> | <b>B:A</b> | <b>0.77</b> | <b>0.49</b> | <b>0.55</b> | <b>68</b> |

|                                            |                 |             |            |             |             |             |            |
|--------------------------------------------|-----------------|-------------|------------|-------------|-------------|-------------|------------|
| <b>Trichloroacetic acid<sup>CSD</sup></b>  | <b>C2HCl3O2</b> | <b>0.22</b> | <b>B:A</b> | <b>0.70</b> | <b>0.42</b> | <b>0.48</b> | <b>69</b>  |
| Tridecanoic Acid                           | C13H26O2        | 0.22        | B:A        | 0.64        | 0.42        | 0.37        | 70         |
| α-D-Galactose                              | C6H12O6         | 0.22        | B:A        | 0.77        | 0.47        | 0.54        | 71         |
| α-L-Xylopyranose                           | C5H10O5         | 0.22        | B:A        | 0.84        | 0.49        | 0.62        | 72         |
| β-D-Glucose                                | C6H12O6         | 0.22        | B:A        | 0.76        | 0.47        | 0.54        | 73         |
| 13-epi-Sclareol                            | C20H36O2        | 0.21        | B:A        | 0.75        | 0.54        | 0.24        | 74         |
| <b>3-Hydroxybenzoic acid<sup>CSD</sup></b> | <b>C7H6O3</b>   | <b>0.21</b> | <b>B:A</b> | <b>0.62</b> | <b>0.40</b> | <b>0.41</b> | <b>75</b>  |
| <b>Cinnamic acid</b>                       | <b>C9H8O2</b>   | <b>0.21</b> | <b>B:A</b> | <b>0.64</b> | <b>0.43</b> | <b>0.35</b> | <b>76</b>  |
| <b>L-Ascorbic acid</b>                     | <b>C6H8O6</b>   | <b>0.21</b> | <b>B:A</b> | <b>0.73</b> | <b>0.52</b> | <b>0.51</b> | <b>77</b>  |
| <b>Suberic acid</b>                        | <b>C8H14O4</b>  | <b>0.21</b> | <b>B:A</b> | <b>0.80</b> | <b>0.51</b> | <b>0.59</b> | <b>78</b>  |
| Tryphenylphosphine oxide                   | C18H15OP        | 0.21        | A:B        | 0.75        | 0.53        |             | 79         |
| Undecanoic Acid                            | C11H22O2        | 0.21        | B:A        | 0.80        | 0.50        | 0.60        | 80         |
| Vanillic acid                              | C8H8O4          | 0.21        | B:A        | 0.64        | 0.43        | 0.33        | 81         |
| α-D-Talose                                 | C6H12O6         | 0.21        | B:A        | 0.76        | 0.49        | 0.54        | 82         |
| 1-Hydroxydiamantane                        | C14H20O         | 0.20        | B:A        | 0.65        | 0.45        | 0.12        | 83         |
| Butyric acid                               | C4H8O2          | 0.20        | B:A        | 0.67        | 0.47        | 0.38        | 84         |
| Cyclobutanol                               | C4H8O           | 0.20        | B:A        | 0.89        | 0.50        | 0.69        | 85         |
| <b>Glycolic acid</b>                       | <b>C2H4O3</b>   | <b>0.20</b> | <b>B:A</b> | <b>0.65</b> | <b>0.42</b> | <b>0.45</b> | <b>86</b>  |
| Palmitic Acid                              | C16H32O2        | 0.20        | B:A        | 0.81        | 0.50        | 0.61        | 87         |
| Pentadecanoic acid                         | C15H30O2        | 0.20        | B:A        | 0.81        | 0.50        | 0.61        | 88         |
| 2-Phenylacetic acid                        | C8H8O2          | 0.20        | B:A        | 0.70        | 0.50        | 0.39        | 89         |
| <b>Salicylic acid<sup>CSD</sup></b>        | <b>C7H6O3</b>   | <b>0.20</b> | <b>B:A</b> | <b>0.66</b> | <b>0.46</b> | <b>0.30</b> | <b>90</b>  |
| Sebacic acid                               | C10H18O4        | 0.20        | B:A        | 0.80        | 0.51        | 0.60        | 91         |
| <b>Stearic acid</b>                        | <b>C18H36O2</b> | <b>0.20</b> | <b>B:A</b> | <b>0.81</b> | <b>0.50</b> | <b>0.61</b> | <b>92</b>  |
| Tetradecanoic acid                         | C14H28O2        | 0.20        | B:A        | 0.81        | 0.49        | 0.61        | 93         |
| β-D-Altropyranose                          | C6H12O6         | 0.20        | B:A        | 0.81        | 0.51        | 0.61        | 94         |
| (-)-Epicedrol                              | C15H26O         | 0.19        | B:A        | 0.69        | 0.50        | 0.31        | 95         |
| Cyclohexane-1,2,3,4,5,6-hexaol             | C6H12O6         | 0.19        | B:A        | 0.67        | 0.47        | 0.38        | 96         |
| <b>1,4-Dioxane<sup>CSD</sup></b>           | <b>C4H8O2</b>   | <b>0.19</b> | <b>B:A</b> | <b>0.59</b> | <b>0.40</b> |             | <b>97</b>  |
| 4-(Hydroxymethyl)phenol                    | C7H8O2          | 0.19        | B:A        | 0.65        | 0.46        | 0.24        | 98         |
| D-Glucuronic acid                          | C6H10O7         | 0.19        | B:A        | 0.77        | 0.43        | 0.58        | 99         |
| <b>Ferulic acid</b>                        | <b>C10H10O4</b> | <b>0.19</b> | <b>B:A</b> | <b>0.59</b> | <b>0.40</b> | <b>0.35</b> | <b>100</b> |
| Lauric acid                                | C12H24O2        | 0.19        | B:A        | 0.82        | 0.52        | 0.63        | 101        |
| <b>L-Malic acid</b>                        | <b>C4H6O5</b>   | <b>0.19</b> | <b>B:A</b> | <b>0.62</b> | <b>0.38</b> | <b>0.43</b> | <b>102</b> |
| D-Lysine                                   | C6H14N2O2       | 0.19        | B:A        | 0.75        | 0.42        | 0.56        | 103        |
| L-Lysine                                   | C6H14N2O2       | 0.19        | B:A        | 0.75        | 0.44        | 0.56        | 104        |
| Sucrose                                    | C12H22O11       | 0.19        | B:A        | 0.80        | 0.50        | 0.61        | 105        |
| 1,4,8,11-Tetra-azacyclotetradecane         | C10H24N4        | 0.18        | B:A        | 0.57        | 0.39        | 0.34        | 106        |
| 3β,12β-Dihydroxy-5β-cholan-24-oic acid     | C24H40O4        | 0.18        | B:A        | 0.74        | 0.42        | 0.56        | 107        |
| D-Altritol                                 | C6H14O6         | 0.18        | B:A        | 0.62        | 0.40        | 0.44        | 108        |
| Quinoxaline-N,N'-dioxide                   | C8H6N2O2        | 0.18        | A:B        | 0.58        | 0.40        |             | 109        |
| <b>Tartaric acid<sup>CSD</sup></b>         | <b>C4H6O6</b>   | <b>0.18</b> | <b>B:A</b> | <b>0.64</b> | <b>0.46</b> | <b>0.36</b> | <b>110</b> |
| Terephthalic acid                          | C8H6O4          | 0.18        | B:A        | 0.68        | 0.51        | 0.42        | 111        |
| Thiourea                                   | CH4N2S          | 0.18        | B:A        | 0.77        | 0.44        | 0.59        | 112        |
| Trimethylamine                             | C3H9N           | 0.18        | A:B        | 0.69        | 0.51        |             | 113        |
| α,α-Galacto-trehalose                      | C12H22O11       | 0.18        | B:A        | 0.75        | 0.51        | 0.58        | 114        |

|                                                                                |                  |             |            |             |             |             |            |
|--------------------------------------------------------------------------------|------------------|-------------|------------|-------------|-------------|-------------|------------|
| 2,2,2-Trifluoroethanol                                                         | C2H3F3O          | 0.17        | B:A        | 0.60        | 0.42        | 0.43        | 115        |
| 2,2'-Dihydroxy-5,5'-diallyl-biphenyl                                           | C18H18O2         | 0.17        | B:A        | 0.62        | 0.45        | 0.15        | 116        |
| <b>4-Hydroxybenzoic acid<sup>CSD</sup></b>                                     | <b>C7H6O3</b>    | <b>0.17</b> | <b>B:A</b> | <b>0.62</b> | <b>0.44</b> | <b>0.26</b> | <b>117</b> |
| Benzoin                                                                        | C14H12O2         | 0.17        | B:A        | 0.56        | 0.40        | 0.25        | 118        |
| Butan-2-ol                                                                     | C4H10O           | 0.17        | B:A        | 0.82        | 0.44        | 0.65        | 119        |
| Galactitol                                                                     | C6H14O6          | 0.17        | B:A        | 0.66        | 0.43        | 0.49        | 120        |
| Hexan-1-amine                                                                  | C6H15N           | 0.17        | B:A        | 0.77        | 0.48        | 0.60        | 121        |
| Pentan-1-amine                                                                 | C5H13N           | 0.17        | B:A        | 0.77        | 0.48        | 0.60        | 122        |
| Trimesic acid                                                                  | C9H6O6           | 0.17        | B:A        | 0.56        | 0.39        | 0.36        | 123        |
| $\alpha$ -D-Glucose                                                            | C6H12O6          | 0.17        | B:A        | 0.71        | 0.46        | 0.55        | 124        |
| $\beta$ -D-Galactose                                                           | C6H12O6          | 0.17        | B:A        | 0.72        | 0.41        | 0.55        | 125        |
| $\beta$ -DL-Arabinose                                                          | C5H10O5          | 0.17        | B:A        | 0.80        | 0.47        | 0.62        | 126        |
| 2,5,5,8 $\alpha$ -Tetramethyloctahydro-2H-2,4 $\alpha$ -methanonaphthalen-1-ol | C15H26O          | 0.16        | B:A        | 0.66        | 0.50        | 0.23        | 127        |
| 2-Coumaric acid                                                                | C9H8O3           | 0.16        | B:A        | 0.58        | 0.42        | 0.34        | 128        |
| 4'-Hydroxyacetophenone                                                         | C8H8O2           | 0.16        | B:A        | 0.65        | 0.49        | 0.41        | 129        |
| Ibuprofen                                                                      | C13H18O2         | 0.16        | B:A        | 0.56        | 0.40        | 0.21        | 130        |
| Butan-1-amine                                                                  | C4H11N           | 0.16        | B:A        | 0.79        | 0.48        | 0.63        | 131        |
| Pterostilbene                                                                  | C16H16O3         | 0.16        | B:A        | 0.56        | 0.40        | 0.14        | 132        |
| Pyrazine                                                                       | C4H4N2           | 0.16        | A:B        | 0.57        | 0.41        |             | 133        |
| 4-(4-Hydroxyphenyl)butan-2-one                                                 | C10H12O2         | 0.16        | B:A        | 0.62        | 0.46        | 0.26        | 134        |
| 3-Oxocyclobutanecarboxylic acid                                                | C5H6O3           | 0.15        | B:A        | 0.79        | 0.51        | 0.64        | 135        |
| Crotonic acid                                                                  | C4H6O2           | 0.15        | B:A        | 0.56        | 0.40        | 0.30        | 136        |
| Cyclodecanol                                                                   | C10H20O          | 0.15        | B:A        | 0.70        | 0.44        | 0.55        | 137        |
| <b>Gallic acid</b>                                                             | <b>C7H6O5</b>    | <b>0.15</b> | <b>B:A</b> | <b>0.56</b> | <b>0.41</b> | <b>0.24</b> | <b>138</b> |
| Glycerol                                                                       | C3H8O3           | 0.15        | B:A        | 0.75        | 0.45        | 0.60        | 139        |
| iso-Deoxycholic acid                                                           | C24H40O4         | 0.15        | B:A        | 0.76        | 0.37        | 0.61        | 140        |
| <b>L-Mandelic acid</b>                                                         | <b>C8H8O3</b>    | <b>0.15</b> | <b>B:A</b> | <b>0.57</b> | <b>0.42</b> | <b>0.28</b> | <b>141</b> |
| N,N-Dimethylacetamide                                                          | C4H9NO           | 0.15        | A:B        | 0.58        | 0.43        |             | 142        |
| <b>Phloroglucinol</b>                                                          | <b>C6H6O3</b>    | <b>0.15</b> | <b>B:A</b> | <b>0.61</b> | <b>0.46</b> | <b>0.12</b> | <b>143</b> |
| Trifluoroacetic acid                                                           | C2HF3O2          | 0.15        | B:A        | 0.71        | 0.47        | 0.56        | 144        |
| $\alpha$ -Lactose                                                              | C12H22O11        | 0.15        | B:A        | 0.81        | 0.48        | 0.66        | 145        |
| (+)-Camphoric acid                                                             | C10H16O4         | 0.14        | B:A        | 0.55        | 0.41        | 0.15        | 146        |
| <b>DL-Malic acid</b>                                                           | <b>C4H6O5</b>    | <b>0.14</b> | <b>B:A</b> | <b>0.64</b> | <b>0.38</b> | <b>0.51</b> | <b>147</b> |
| (E)-4,4'-Diazastilbene                                                         | C12H10N2         | 0.14        | A:B        | 0.60        | 0.46        |             | 148        |
| 4-(Hydroxymethyl)-2-methoxyphenol                                              | C8H10O3          | 0.14        | B:A        | 0.58        | 0.44        | 0.23        | 149        |
| <b>L-Arginine</b>                                                              | <b>C6H14N4O2</b> | <b>0.14</b> | <b>B:A</b> | <b>0.84</b> | <b>0.44</b> | <b>0.70</b> | <b>150</b> |
| L-Ribose                                                                       | C5H10O5          | 0.14        | B:A        | 0.82        | 0.43        | 0.68        | 151        |
| Myricetin                                                                      | C15H10O8         | 0.14        | B:A        | 0.68        | 0.50        | 0.54        | 152        |
| <b>n-Butanol<sup>CSD</sup></b>                                                 | <b>C4H10O</b>    | <b>0.14</b> | <b>B:A</b> | <b>0.56</b> | <b>0.42</b> | <b>0.34</b> | <b>153</b> |
| Salicylaldehyde                                                                | C7H6O2           | 0.14        | B:A        | 0.61        | 0.47        | 0.27        | 154        |
| (1R,2S)-2-Methyl-4-oxocyclohexane-1-carboxylic acid                            | C8H12O3          | 0.13        | B:A        | 0.59        | 0.39        | 0.46        | 155        |
| (R,S)-Hesperetin                                                               | C16H14O6         | 0.13        | B:A        | 0.61        | 0.47        | 0.29        | 156        |
| 2,5-bis(4-Pyridyl)-1,3,4-oxadiazole                                            | C12H8N4O         | 0.13        | A:B        | 0.52        | 0.39        |             | 157        |
| Sucralose                                                                      | C12H19Cl3O8      | 0.13        | B:A        | 0.80        | 0.47        | 0.67        | 158        |
| Propan-2-one                                                                   | C3H6O            | 0.13        | A:B        | 0.59        | 0.46        |             | 159        |

|                                                      |                 |             |            |             |             |             |            |
|------------------------------------------------------|-----------------|-------------|------------|-------------|-------------|-------------|------------|
| <b>Catechol</b>                                      | <b>C6H6O2</b>   | <b>0.13</b> | <b>B:A</b> | <b>0.59</b> | <b>0.46</b> | <b>0.14</b> | <b>160</b> |
| Ethylene glycol                                      | C2H6O2          | 0.13        | B:A        | 0.61        | 0.37        | 0.48        | 161        |
| <b>Gentisic acid<sup>CSD</sup></b>                   | <b>C7H6O4</b>   | <b>0.13</b> | <b>B:A</b> | <b>0.54</b> | <b>0.41</b> | <b>0.23</b> | <b>162</b> |
| <b>Heptanol<sup>CSD</sup></b>                        | <b>C7H16O</b>   | <b>0.13</b> | <b>B:A</b> | <b>0.55</b> | <b>0.42</b> | <b>0.33</b> | <b>163</b> |
| <b>Hexanol<sup>CSD</sup></b>                         | <b>C6H14O</b>   | <b>0.13</b> | <b>B:A</b> | <b>0.55</b> | <b>0.42</b> | <b>0.33</b> | <b>164</b> |
| <b>Hydroquinone</b>                                  | <b>C6H6O2</b>   | <b>0.13</b> | <b>B:A</b> | <b>0.62</b> | <b>0.49</b> | <b>0.18</b> | <b>165</b> |
| Levulinic acid                                       | C5H8O3          | 0.13        | B:A        | 0.53        | 0.37        | 0.40        | 166        |
| Propan-1-amine                                       | C3H9N           | 0.13        | B:A        | 0.79        | 0.47        | 0.67        | 167        |
| <b>Octanol<sup>CSD</sup></b>                         | <b>C8H18O</b>   | <b>0.13</b> | <b>B:A</b> | <b>0.55</b> | <b>0.42</b> | <b>0.34</b> | <b>168</b> |
| <b>Orcinol</b>                                       | <b>C7H8O2</b>   | <b>0.13</b> | <b>B:A</b> | <b>0.59</b> | <b>0.46</b> | <b>0.11</b> | <b>169</b> |
| α,α-Trehalose                                        | C12H22O11       | 0.13        | B:A        | 0.76        | 0.49        | 0.63        | 170        |
| 4-Acetamidobenzoic acid                              | C9H9NO3         | 0.12        | B:A        | 0.55        | 0.43        | 0.40        | 171        |
| 5-Nitroisophthalic acid                              | C8H5NO6         | 0.12        | B:A        | 0.56        | 0.44        | 0.30        | 172        |
| D-Arabinitol                                         | C5H12O5         | 0.12        | B:A        | 0.55        | 0.43        | 0.31        | 173        |
| D-Mannitol                                           | C6H14O6         | 0.12        | B:A        | 0.63        | 0.35        | 0.51        | 174        |
| Melamine                                             | C3H6N6          | 0.12        | B:A        | 0.84        | 0.46        | 0.72        | 175        |
| Methanol                                             | CH4O            | 0.12        | B:A        | 0.62        | 0.50        | 0.50        | 176        |
| 2-Chloroacetic acid                                  | C2H3ClO2        | 0.12        | B:A        | 0.69        | 0.41        | 0.57        | 177        |
| Acetylmethionine                                     | C7H13NO3S       | 0.12        | B:A        | 0.66        | 0.49        | 0.54        | 178        |
| Phenyl 2-Hydroxybenzoate                             | C13H10O3        | 0.12        | B:A        | 0.55        | 0.43        | 0.16        | 179        |
| Pyridine                                             | C5H5N           | 0.12        | A:B        | 0.61        | 0.49        |             | 180        |
| <b>Resorcinol</b>                                    | <b>C6H6O2</b>   | <b>0.12</b> | <b>B:A</b> | <b>0.61</b> | <b>0.49</b> | <b>0.18</b> | <b>181</b> |
| 2-Methylpropan-2-ol                                  | C4H10O          | 0.12        | B:A        | 0.54        | 0.42        | 0.30        | 182        |
| 1,13-Tridecanediol                                   | C13H28O2        | 0.11        | B:A        | 0.56        | 0.45        | 0.26        | 183        |
| Biotin                                               | C10H16N2O3S     | 0.11        | B:A        | 0.69        | 0.42        | 0.58        | 184        |
| <b>Ethyl acetate<sup>CSD</sup></b>                   | <b>C4H8O2</b>   | <b>0.11</b> | <b>A:B</b> | <b>0.54</b> | <b>0.43</b> |             | <b>185</b> |
| Ethylenediamine                                      | C2H8N2          | 0.11        | B:A        | 0.79        | 0.48        | 0.68        | 186        |
| <b>Hippuric acid</b>                                 | <b>C9H9NO3</b>  | <b>0.11</b> | <b>B:A</b> | <b>0.59</b> | <b>0.48</b> | <b>0.39</b> | <b>187</b> |
| Indomethacin                                         | C19H16ClNO4     | 0.11        | B:A        | 0.56        | 0.45        | 0.34        | 188        |
| <b>Malonic acid</b>                                  | <b>C3H4O4</b>   | <b>0.11</b> | <b>B:A</b> | <b>0.64</b> | <b>0.53</b> | <b>0.43</b> | <b>189</b> |
| n-Methyl-D-glucamine                                 | C7H17NO5        | 0.11        | B:A        | 0.58        | 0.43        | 0.47        | 190        |
| o-β-D-Mannopyranosyl-(1-4)-α-D-mannopyranose         | C12H22O11       | 0.11        | B:A        | 0.75        | 0.44        | 0.63        | 191        |
| 4,4,7-Trimethyldecahydro-1H-cyclopenta[cd]inden-7-ol | C14H24O         | 0.11        | B:A        | 0.62        | 0.50        | 0.28        | 192        |
| β-Maltose                                            | C12H22O11       | 0.11        | B:A        | 0.78        | 0.49        | 0.67        | 193        |
| Muco-inositol                                        | C6H12O6         | 0.10        | B:A        | 0.71        | 0.36        | 0.62        | 194        |
| 1-Hydroxy-2-naphthoic acid                           | C11H8O3         | 0.10        | B:A        | 0.51        | 0.41        | 0.21        | 195        |
| 4-Ethoxyphenol                                       | C8H10O2         | 0.10        | B:A        | 0.54        | 0.44        | 0.20        | 196        |
| Adamantane-1,3,5,7-tetracarboxylic acid              | C14H16O8        | 0.10        | B:A        | 0.53        | 0.43        | 0.12        | 197        |
| cis,cis-1,3,5-Cyclohexanetricarboxylic acid          | C9H12O6         | 0.10        | B:A        | 0.53        | 0.43        | 0.26        | 198        |
| 1,1-Dihydroxypropan-2-one                            | C3H6O3          | 0.10        | B:A        | 0.59        | 0.39        | 0.49        | 199        |
| Hexanoic acid                                        | C6H12O2         | 0.10        | B:A        | 0.60        | 0.49        | 0.32        | 200        |
| Octanoic acid                                        | C8H16O2         | 0.10        | B:A        | 0.59        | 0.49        | 0.32        | 201        |
| <b>Saccharin<sup>CSD</sup></b>                       | <b>C7H5NO3S</b> | <b>0.10</b> | <b>B:A</b> | <b>0.56</b> | <b>0.46</b> | <b>0.21</b> | <b>202</b> |

|                                                      |                  |             |            |             |             |             |            |
|------------------------------------------------------|------------------|-------------|------------|-------------|-------------|-------------|------------|
| (2R,3R)-2,3-Dimethylcyclopropane-1-carboxylic acid   | C6H10O2          | 0.10        | B:A        | 0.54        | 0.43        | 0.38        | 203        |
| β-D-Fructopyranose                                   | C6H12O6          | 0.10        | B:A        | 0.76        | 0.45        | 0.66        | 204        |
| 2,4,6-Trimethylphenol                                | C9H12O           | 0.09        | B:A        | 0.58        | 0.49        | 0.12        | 205        |
| <b>3,5-Dinitrosalicylic acid<sup>CSD</sup></b>       | <b>C7H4N2O7</b>  | <b>0.09</b> | <b>B:A</b> | <b>0.53</b> | <b>0.44</b> | <b>0.28</b> | <b>206</b> |
| β-D-Psicose                                          | C6H12O6          | 0.09        | B:A        | 0.76        | 0.42        | 0.67        | 207        |
| Decanoic acid                                        | C10H20O2         | 0.09        | B:A        | 0.59        | 0.49        | 0.33        | 208        |
| Heptanoic acid                                       | C7H14O2          | 0.09        | B:A        | 0.58        | 0.49        | 0.32        | 209        |
| myo-Inositol                                         | C6H12O6          | 0.09        | B:A        | 0.71        | 0.36        | 0.62        | 210        |
| Nonanoic acid                                        | C9H18O2          | 0.09        | B:A        | 0.59        | 0.50        | 0.33        | 211        |
| β-D-Allose                                           | C6H12O6          | 0.09        | B:A        | 0.71        | 0.36        | 0.62        | 212        |
| β-Lactose                                            | C12H22O11        | 0.09        | B:A        | 0.72        | 0.38        | 0.63        | 213        |
| 1-Amino-1-methylcyclopropane                         | C4H9N            | 0.08        | B:A        | 0.71        | 0.46        | 0.63        | 214        |
| 1-Hydroxypropan-2-one                                | C3H6O2           | 0.08        | B:A        | 0.57        | 0.49        | 0.38        | 215        |
| 2,6-Pyridinedicarboxylic acid                        | C7H5NO4          | 0.08        | B:A        | 0.63        | 0.48        | 0.55        | 216        |
| 3,5-Dinitrobenzoic acid                              | C7H4N2O6         | 0.08        | B:A        | 0.41        | 0.32        | 0.30        | 217        |
| Ethylamine                                           | C2H7N            | 0.08        | B:A        | 0.80        | 0.48        | 0.72        | 218        |
| n-Hexadecanol                                        | C16H34O          | 0.08        | B:A        | 0.60        | 0.52        | 0.36        | 219        |
| Dihydrofuran-2,5-dione                               | C4H4O3           | 0.08        | A:B        | 0.48        | 0.40        |             | 220        |
| β-D-Gulose                                           | C6H12O6          | 0.08        | B:A        | 0.71        | 0.35        | 0.62        | 221        |
| 2-Isopropyl-5-methylphenol                           | C10H14O          | 0.07        | B:A        | 0.57        | 0.51        | 0.07        | 222        |
| 2-(Tert-butyl)-4-methoxyphenol                       | C11H16O2         | 0.07        | B:A        | 0.51        | 0.44        | 0.14        | 223        |
| Lidocaine                                            | C18H32O2         | 0.07        | B:A        | 0.49        | 0.42        | 0.28        | 224        |
| <b>Naphthalene-1,5-disulfonic acid<sup>CSD</sup></b> | <b>C10H8S2O6</b> | <b>0.07</b> | <b>B:A</b> | <b>0.54</b> | <b>0.44</b> | <b>0.47</b> | <b>225</b> |
| o-Cresol                                             | C7H8O            | 0.07        | B:A        | 0.50        | 0.43        | 0.13        | 226        |
| Phenol                                               | C6H6O            | 0.07        | B:A        | 0.57        | 0.51        | 0.20        | 227        |
| Phenylmethanol                                       | C7H8O            | 0.07        | B:A        | 0.57        | 0.50        | 0.19        | 228        |
| <b>Theophylline</b>                                  | <b>C7H8N4O2</b>  | <b>0.07</b> | <b>B:A</b> | <b>0.53</b> | <b>0.39</b> | <b>0.46</b> | <b>229</b> |
| 1-Naphthalenesulfonic acid                           | C10H8O3S         | 0.06        | B:A        | 0.52        | 0.44        | 0.46        | 230        |
| 1-Naphthol                                           | C10H8O           | 0.06        | B:A        | 0.52        | 0.46        | 0.08        | 231        |
| 4-Nitrobenzoic acid                                  | C7H5NO4          | 0.06        | B:A        | 0.63        | 0.57        | 0.37        | 232        |
| 2-Ethyl-3-hydroxy-4H-pyran-4-one                     | C7H8O3           | 0.06        | B:A        | 0.67        | 0.46        | 0.61        | 233        |
| L-Cysteine                                           | C3H7NO2S         | 0.06        | B:A        | 0.97        | 0.44        | 0.91        | 234        |
| Acrylaldehyde                                        | C3H4O            | 0.06        | A:B        | 0.53        | 0.47        |             | 235        |
| <b>Uracil</b>                                        | <b>C4H4N2O2</b>  | <b>0.06</b> | <b>A:B</b> | <b>0.62</b> | <b>0.49</b> | <b>0.56</b> | <b>236</b> |
| β-L-Lyxopyranose                                     | C5H10O5          | 0.06        | B:A        | 0.68        | 0.36        | 0.62        | 237        |
| 1,11-Undecanediol                                    | C11H24O2         | 0.05        | B:A        | 0.58        | 0.53        | 0.35        | 238        |
| 4-Aminobenzamide                                     | C7H8N2O          | 0.05        | B:A        | 0.76        | 0.42        | 0.71        | 239        |
| N-Methylpyrrolidone                                  | C5H9NO           | 0.05        | A:B        | 0.52        | 0.47        |             | 240        |
| 4-Hydroxybenzaldehyde                                | C7H6O2           | 0.05        | B:A        | 0.50        | 0.45        | 0.35        | 241        |
| <b>Propionamide</b>                                  | <b>C3H7NO</b>    | <b>0.05</b> | <b>B:A</b> | <b>0.85</b> | <b>0.52</b> | <b>0.79</b> | <b>242</b> |
| (S)-2-Hydroxypropanamide                             | C3H7NO2          | 0.05        | B:A        | 0.79        | 0.44        | 0.74        | 243        |
| α-8'-β-Apocarotenal                                  | C30H40O          | 0.05        | A:B        | 0.56        | 0.51        |             | 244        |
| α-Maltose                                            | C12H22O11        | 0.05        | B:A        | 0.67        | 0.38        | 0.63        | 245        |
| (E)-4-(4-Hydroxy-3-methoxyphenyl)but-3-en-2-one      | C11H12O3         | 0.04        | B:A        | 0.44        | 0.40        | 0.33        | 246        |
| 1,3-Di(pyridin-4-yl)propane                          | C13H14N2         | 0.04        | A:B        | 0.56        | 0.52        |             | 247        |

|                                                  |                 |             |            |             |             |             |            |
|--------------------------------------------------|-----------------|-------------|------------|-------------|-------------|-------------|------------|
| 1-Pentanol                                       | C5H12O          | 0.04        | B:A        | 0.58        | 0.54        | 0.38        | 248        |
| 2,2',2''-Nitrilotriethanol                       | C6H15NO3        | 0.04        | B:A        | 0.55        | 0.50        | 0.30        | 249        |
| 2,4-Pyridinedicarboxylic acid                    | C7H5NO4         | 0.04        | B:A        | 0.63        | 0.48        | 0.59        | 250        |
| 2,5-Dimethylphenol                               | C8H10O          | 0.04        | B:A        | 0.47        | 0.43        | 0.13        | 251        |
| <b>Cinnamide</b>                                 | <b>C9H9NO</b>   | <b>0.04</b> | <b>B:A</b> | <b>0.80</b> | <b>0.52</b> | <b>0.75</b> | <b>252</b> |
| 2-Aminoethan-1-ol                                | C2H7NO          | 0.04        | B:A        | 0.72        | 0.51        | 0.68        | 253        |
| Pyruvic acid                                     | C3H4O3          | 0.04        | A:B        | 0.61        | 0.46        | 0.57        | 254        |
| $\beta$ -8'- $\beta$ -Apocarotenal               | C30H40O         | 0.04        | A:B        | 0.55        | 0.51        |             | 255        |
| 1,1'-Azo-bis(carbamide)                          | C2H4N4O2        | 0.03        | B:A        | 0.89        | 0.39        | 0.86        | 256        |
| 1,2-bis(4-Pyridyl)ethane                         | C12H10N2        | 0.03        | A:B        | 0.55        | 0.52        |             | 257        |
| 4,4'-Bipyridine                                  | C10H8N2         | 0.03        | A:B        | 0.55        | 0.52        |             | 258        |
| <b>Benzamide</b>                                 | <b>C7H7NO</b>   | <b>0.03</b> | <b>B:A</b> | <b>0.68</b> | <b>0.42</b> | <b>0.65</b> | <b>259</b> |
| 2,8,16,20-Tetramethylcalix(4)resorcinarene       | C32H32O8        | 0.03        | B:A        | 0.53        | 0.50        | 0.10        | 260        |
| 2-Hydroxyacetamide                               | C2H5NO2         | 0.03        | B:A        | 0.81        | 0.44        | 0.78        | 261        |
| <b>Picric acid<sup>CSO</sup></b>                 | <b>C6H3N3O7</b> | <b>0.03</b> | <b>B:A</b> | <b>0.52</b> | <b>0.50</b> | <b>0.17</b> | <b>262</b> |
| <b>Piperazine</b>                                | <b>C4H10N2</b>  | <b>0.03</b> | <b>B:A</b> | <b>0.62</b> | <b>0.51</b> | <b>0.59</b> | <b>263</b> |
| (R)-2-Hydroxypropanamide                         | C3H7NO2         | 0.03        | B:A        | 0.78        | 0.44        | 0.75        | 264        |
| 2-Aminopyrimidine                                | C4H5N3          | 0.02        | B:A        | 0.84        | 0.42        | 0.82        | 265        |
| Phenylmethanethiol                               | C7H8S           | 0.02        | B:A        | 0.46        | 0.44        | 0.03        | 266        |
| Piperidine                                       | C5H11N          | 0.02        | B:A        | 0.61        | 0.51        | 0.60        | 267        |
| 4-Methylbenzenesulfonic acid                     | C7H8O3S         | 0.02        | B:A        | 0.56        | 0.43        | 0.54        | 268        |
| S(+)-Camphor-10-sulfonic acid                    | C10H16O4S       | 0.02        | B:A        | 0.59        | 0.45        | 0.57        | 269        |
| <b>Succinamide</b>                               | <b>C4H8N2O2</b> | <b>0.02</b> | <b>B:A</b> | <b>0.80</b> | <b>0.43</b> | <b>0.78</b> | <b>270</b> |
| 2,3,5,6-Tetrachlorocyclohexa-2,5-diene-1,4-dione | C6Cl4O2         | 0.02        | A:B        | 0.52        | 0.50        |             | 271        |
| $\alpha$ -Ketoglutaric acid                      | C5H6O5          | 0.02        | B:A        | 0.61        | 0.39        | 0.59        | 272        |
| 2,2-Dibromo-2-cyanoacetamide                     | C3H2Br2N2O      | 0.01        | B:A        | 0.81        | 0.48        | 0.80        | 273        |
| [1,1'-Biphenyl]-4,4'-diol                        | C12H10O2        | 0.01        | B:A        | 0.34        | 0.33        | 0.06        | 274        |
| 4-Hydroxy-3,5-dimethoxybenzaldehyde              | C9H10O4         | 0.01        | B:A        | 0.50        | 0.49        | 0.42        | 275        |
| 4-Nitrophenol                                    | C6H5NO3         | 0.01        | B:A        | 0.55        | 0.54        | 0.28        | 276        |
| <b>Orotic acid</b>                               | <b>C5H4N2O4</b> | <b>0.01</b> | <b>B:A</b> | <b>0.54</b> | <b>0.54</b> | <b>0.51</b> | <b>277</b> |
| (5-Hydroxy-6-methylpyridine-3,4-diyl)dimethanol  | C8H11NO3        | 0.01        | B:A        | 0.48        | 0.47        | 0.33        | 278        |
| <b>Urea</b>                                      | <b>CH4N2O</b>   | <b>0.01</b> | <b>B:A</b> | <b>0.91</b> | <b>0.54</b> | <b>0.91</b> | <b>279</b> |
| Butyramide                                       | C4H9NO          | 0.00        | B:B        | 0.79        | 0.37        | 0.79        | 280        |
| Imidazole                                        | C3H4N2          | 0.00        | B:B        | 0.70        | 0.44        | 0.70        | 281        |
| Piperine                                         | C17H19NO3       | 0.00        | A:B        | 0.37        | 0.37        |             | 282        |
| Chloranilic acid                                 | C6H2Cl2O4       | -0.01       | B:B        | 0.52        | 0.37        | 0.54        | 283        |
| Furfural                                         | C6H12O2         | -0.01       | A:A        | 0.38        | 0.39        |             | 284        |
| $\beta$ -Cellobiose                              | C12H22O11       | -0.01       | B:B        | 0.68        | 0.34        | 0.70        | 285        |
| DL-Valine                                        | C5H11NO2        | -0.02       | B:B        | 0.96        | 0.54        | 0.98        | 286        |
| $\beta$ -galabiose                               | C12H22O11       | -0.02       | B:B        | 0.67        | 0.34        | 0.70        | 287        |
| 1,1-bis(4-Hydroxyphenyl)cyclohexane              | C18H20O2        | -0.03       | A:A        | 0.57        | 0.60        | 0.20        | 288        |
| 2-Pyridone                                       | C5H5NO          | -0.03       | B:B        | 0.83        | 0.43        | 0.87        | 289        |
| 5,5-Diethylbarbituric acid                       | C8H12N2O3       | -0.03       | B:B        | 0.61        | 0.33        | 0.64        | 290        |
| Acetamide                                        | C2H5NO          | -0.03       | B:B        | 0.83        | 0.44        | 0.86        | 291        |

|                                            |                 |              |            |             |             |             |            |
|--------------------------------------------|-----------------|--------------|------------|-------------|-------------|-------------|------------|
| 4,4'-Ethene-1,2-diyl dipyridine            | C12H10N2        | -0.03        | A:A        | 0.41        | 0.44        |             | 292        |
| DL-Isoleucine                              | C6H13NO2        | -0.03        | B:B        | 0.95        | 0.54        | 0.98        | 293        |
| DL-Leucine                                 | C6H13NO2        | -0.03        | B:B        | 0.95        | 0.54        | 0.98        | 294        |
| L-Leucine                                  | C6H13NO2        | -0.03        | B:B        | 0.95        | 0.54        | 0.98        | 295        |
| <b>Nicotinamide</b>                        | <b>C6H6N2O</b>  | <b>-0.03</b> | <b>B:B</b> | <b>0.74</b> | <b>0.51</b> | <b>0.78</b> | <b>296</b> |
| <b>Vanillin</b>                            | <b>C8H8O3</b>   | <b>-0.03</b> | <b>A:A</b> | <b>0.58</b> | <b>0.61</b> | <b>0.41</b> | <b>297</b> |
| 1,2,4,5-Tetracyanobenzene                  | C10H2N4         | -0.04        | A:A        | 0.44        | 0.48        |             | 298        |
| Cinnamaldehyde                             | C9H8O           | -0.04        | A:A        | 0.39        | 0.42        |             | 299        |
| D-Alanine                                  | C3H7NO2         | -0.04        | B:B        | 0.95        | 0.55        | 0.99        | 300        |
| Formamide                                  | CH3NO           | -0.04        | B:B        | 0.83        | 0.41        | 0.87        | 301        |
| <b>Glycine</b>                             | <b>C2H5NO2</b>  | <b>-0.04</b> | <b>B:B</b> | <b>0.95</b> | <b>0.54</b> | <b>0.99</b> | <b>302</b> |
| L-Methionine                               | C5H11NO2S       | -0.04        | B:B        | 0.93        | 0.69        | 0.97        | 303        |
| Neotame                                    | C20H30N2O5      | -0.04        | B:B        | 0.92        | 0.54        | 0.96        | 304        |
| <b>Oxalic acid</b>                         | <b>C2H2O4</b>   | <b>-0.04</b> | <b>A:A</b> | <b>0.47</b> | <b>0.52</b> | <b>0.41</b> | <b>305</b> |
| 1,4-Diazabicyclo[2.2.2]octane              | C6H12N2         | -0.05        | A:A        | 0.47        | 0.51        |             | 306        |
| DL-Glutamic acid                           | C5H9NO4         | -0.05        | B:B        | 0.93        | 0.48        | 0.98        | 307        |
| DL-Glutamine                               | C5H10N2O3       | -0.05        | B:B        | 0.93        | 0.46        | 0.98        | 308        |
| 4-Aminobutanoic acid                       | C4H9NO2         | -0.05        | B:B        | 0.93        | 0.48        | 0.98        | 309        |
| Methyl acetate                             | C3H6O2          | -0.05        | A:A        | 0.44        | 0.48        |             | 310        |
| <b>Theobromine</b>                         | <b>C7H8N4O2</b> | <b>-0.05</b> | <b>B:B</b> | <b>0.43</b> | <b>0.36</b> | <b>0.48</b> | <b>311</b> |
| 1,2-Ethanedisulfonic acid                  | C2H6O6S2        | -0.06        | B:B        | 0.61        | 0.45        | 0.67        | 312        |
| 3S-cis-3,6-Dimethyl-1,4-dioxane-2,5-dione  | C6H8O4          | -0.06        | A:A        | 0.39        | 0.45        |             | 313        |
| DL-Arginine                                | C6H14N4O2       | -0.06        | B:B        | 0.93        | 0.43        | 0.98        | 314        |
| DL-Methionine                              | C5H11NO2S       | -0.06        | B:B        | 0.91        | 0.54        | 0.97        | 315        |
| L-Asparagine                               | C4H8N2O3        | -0.06        | B:B        | 0.91        | 0.49        | 0.97        | 316        |
| <b>L-Aspartic acid</b>                     | <b>C4H7NO4</b>  | <b>-0.06</b> | <b>B:B</b> | <b>0.92</b> | <b>0.46</b> | <b>0.98</b> | <b>317</b> |
| <b>L-Proline</b>                           | <b>C5H9NO2</b>  | <b>-0.06</b> | <b>B:B</b> | <b>0.87</b> | <b>0.54</b> | <b>0.94</b> | <b>318</b> |
| L-Tryptophan                               | C11H12N2O2      | -0.06        | B:B        | 0.90        | 0.50        | 0.96        | 319        |
| <b>Nicotinic acid</b>                      | <b>C6H5NO2</b>  | <b>-0.06</b> | <b>B:B</b> | <b>0.61</b> | <b>0.53</b> | <b>0.67</b> | <b>320</b> |
| 1,1,6,6-Tetraphenylhexa-2,4-diyne-1,6-diol | C30H22O2        | -0.07        | A:A        | 0.43        | 0.50        | 0.09        | 321        |
| 2,4-Dimethylpyridine                       | C7H9N           | -0.07        | A:A        | 0.40        | 0.47        |             | 322        |
| 2,6-Dimethylpyridine                       | C7H9N           | -0.07        | A:A        | 0.41        | 0.48        |             | 323        |
| Cyclamic acid                              | C6H13NO3S       | -0.07        | B:B        | 0.69        | 0.45        | 0.76        | 324        |
| <b>DL-Aspartic acid</b>                    | <b>C4H7NO4</b>  | <b>-0.07</b> | <b>B:B</b> | <b>0.91</b> | <b>0.50</b> | <b>0.98</b> | <b>325</b> |
| <b>Glutamic acid</b>                       | <b>C5H9NO4</b>  | <b>-0.07</b> | <b>B:B</b> | <b>0.90</b> | <b>0.51</b> | <b>0.97</b> | <b>326</b> |
| D-Threonine                                | C4H9NO3         | -0.07        | B:B        | 0.90        | 0.45        | 0.97        | 327        |
| <b><i>ε</i>-Caprolactam<sup>CSD</sup></b>  | <b>C6H11NO</b>  | <b>-0.07</b> | <b>B:B</b> | <b>0.69</b> | <b>0.46</b> | <b>0.76</b> | <b>328</b> |
| Formaldehyde                               | CH2O            | -0.07        | A:A        | 0.39        | 0.46        |             | 329        |
| L-Cystine                                  | C6H12N2O4S2     | -0.07        | B:B        | 0.90        | 0.47        | 0.98        | 330        |
| Pyromellitic                               | C10H2O6         | -0.07        | A:A        | 0.40        | 0.47        |             | 331        |
| [1,1'-Binaphthalene]-2,2'-diol             | C20H14O2        | -0.08        | A:A        | 0.31        | 0.39        | 0.05        | 332        |
| 2,6-Di-tert-butyl-4-methylphenol           | C15H24O         | -0.08        | A:A        | 0.39        | 0.47        | 0.05        | 333        |
| D-Asparagine                               | C4H8N2O3        | -0.08        | B:B        | 0.88        | 0.45        | 0.96        | 334        |
| Dimethylsulfoxide                          | C2H6OS          | -0.08        | A:A        | 0.32        | 0.40        |             | 335        |
| D-Isoleucine                               | C6H13NO2        | -0.08        | B:B        | 0.88        | 0.43        | 0.96        | 336        |



|                                                                                                                               |                         |                     |                   |                    |                    |                    |                   |
|-------------------------------------------------------------------------------------------------------------------------------|-------------------------|---------------------|-------------------|--------------------|--------------------|--------------------|-------------------|
| <b><u>Isonicotinamide</u></b>                                                                                                 | <b><u>C6H6N2O</u></b>   | <b><u>-0.08</u></b> | <b><u>B:B</u></b> | <b><u>0.64</u></b> | <b><u>0.39</u></b> | <b><u>0.72</u></b> | <b><u>337</u></b> |
| <b><u>L-Alanine</u></b>                                                                                                       | <b><u>C3H7NO2</u></b>   | <b><u>-0.08</u></b> | <b><u>B:B</u></b> | <b><u>0.89</u></b> | <b><u>0.52</u></b> | <b><u>0.97</u></b> | <b><u>338</u></b> |
| L-Cysteine                                                                                                                    | C3H7NO2S                | -0.08               | B:B               | 0.89               | 0.44               | 0.97               | 339               |
| <b><u>L-Glutamine</u></b>                                                                                                     | <b><u>C5H10N2O3</u></b> | <b><u>-0.08</u></b> | <b><u>B:B</u></b> | <b><u>0.89</u></b> | <b><u>0.55</u></b> | <b><u>0.97</u></b> | <b><u>340</u></b> |
| L- $\alpha$ -Leucine                                                                                                          | C6H13NO2                | -0.08               | B:B               | 0.88               | 0.44               | 0.96               | 341               |
| Nitromethane                                                                                                                  | CH3NO2                  | -0.08               | A:A               | 0.34               | 0.42               |                    | 342               |
| $\beta$ -Alanine                                                                                                              | C3H7NO2                 | -0.08               | B:B               | 0.91               | 0.49               | 0.99               | 343               |
| 2,2'-Bipyridine                                                                                                               | C10H8N2                 | -0.09               | A:A               | 0.39               | 0.48               |                    | 344               |
| Cyclohexanone                                                                                                                 | C4H8                    | -0.09               | A:A               | 0.36               | 0.45               |                    | 345               |
| DL-Cysteine                                                                                                                   | C3H7NO2S                | -0.09               | B:B               | 0.89               | 0.49               | 0.98               | 346               |
| Tetramethylpyrazine                                                                                                           | C8H12N2                 | -0.09               | A:A               | 0.30               | 0.39               |                    | 347               |
| 4-Hydroxy-L-proline                                                                                                           | C5H9NO3                 | -0.10               | B:B               | 0.87               | 0.52               | 0.96               | 348               |
| Chloro(methoxy)methane                                                                                                        | C2H5ClO                 | -0.10               | A:A               | 0.31               | 0.41               |                    | 349               |
| Proline                                                                                                                       | C5H9NO2                 | -0.10               | B:B               | 0.76               | 0.42               | 0.87               | 350               |
| DL-Tryptophan                                                                                                                 | C11H12N2O2              | -0.10               | B:B               | 0.85               | 0.43               | 0.95               | 351               |
| DL-Tyrosine                                                                                                                   | C9H11NO3                | -0.10               | B:B               | 0.86               | 0.47               | 0.96               | 352               |
| L-Threonine                                                                                                                   | C4H9NO3                 | -0.10               | B:B               | 0.89               | 0.40               | 0.98               | 353               |
| <b><u>L-Valine</u></b>                                                                                                        | <b><u>C5H11NO2</u></b>  | <b><u>-0.10</u></b> | <b><u>B:B</u></b> | <b><u>0.87</u></b> | <b><u>0.55</u></b> | <b><u>0.97</u></b> | <b><u>354</u></b> |
| Terephthalaldehyde                                                                                                            | C8H6O2                  | -0.10               | A:A               | 0.29               | 0.39               |                    | 355               |
| 3-Isochromanone                                                                                                               | C9H8O2                  | -0.11               | A:A               | 0.33               | 0.44               |                    | 356               |
| DL-Serine                                                                                                                     | C3H7NO3                 | -0.11               | B:B               | 0.87               | 0.50               | 0.98               | 357               |
| Morpholine                                                                                                                    | C4H9NO                  | -0.11               | B:B               | 0.56               | 0.36               | 0.67               | 358               |
| Trimethylamine oxide                                                                                                          | C3H9NO                  | -0.11               | A:A               | 0.34               | 0.45               |                    | 359               |
| 1,3-Distearoyl-2-oleoylglycerol                                                                                               | C57H108O6               | -0.12               | A:A               | 0.33               | 0.45               |                    | 360               |
| 2,3-Dimethylpyrazine                                                                                                          | C6H8N2                  | -0.12               | A:A               | 0.35               | 0.47               |                    | 361               |
| 2,5-Dimethylpyrazine                                                                                                          | C6H8N2                  | -0.12               | A:A               | 0.35               | 0.47               |                    | 362               |
| Phthalide                                                                                                                     | C8H6O2                  | -0.12               | A:A               | 0.37               | 0.49               |                    | 363               |
| <b><u>Pyroglutamic acid</u></b>                                                                                               | <b><u>C5H7NO3</u></b>   | <b><u>-0.12</u></b> | <b><u>B:B</u></b> | <b><u>0.65</u></b> | <b><u>0.48</u></b> | <b><u>0.77</u></b> | <b><u>364</u></b> |
| <b><i>Caffeine</i></b>                                                                                                        | <b><i>C8H10N4O2</i></b> | <b><i>-0.13</i></b> | <b><i>A:A</i></b> | <b><i>0.35</i></b> | <b><i>0.48</i></b> |                    | <b><i>365</i></b> |
| Hexamethylenetetramine                                                                                                        | C6H12N4                 | -0.13               | A:A               | 0.37               | 0.50               |                    | 366               |
| L-Tyrosine                                                                                                                    | C9H11NO3                | -0.13               | B:B               | 0.84               | 0.37               | 0.98               | 367               |
| 4-Benzoquinone                                                                                                                | C6H4O2                  | -0.14               | A:A               | 0.32               | 0.46               |                    | 368               |
| Tetracyanoethylene                                                                                                            | C6N4                    | -0.14               | A:A               | 0.33               | 0.47               |                    | 369               |
| 2,5-Piperazinedione                                                                                                           | C4H6N2O2                | -0.15               | B:B               | 0.67               | 0.34               | 0.82               | 370               |
| Benzalacetone                                                                                                                 | C10H10O                 | -0.15               | A:A               | 0.35               | 0.50               |                    | 371               |
| Carbamazepine                                                                                                                 | C15H12N2O               | -0.15               | B:B               | 0.77               | 0.46               | 0.93               | 372               |
| 2-(Oleoyloxy)propane-1,3-diyl distearate                                                                                      | C57H108O6               | -0.15               | A:A               | 0.31               | 0.46               |                    | 373               |
| (3 $\alpha$ R,4R,6 $\alpha$ S,10 $\alpha$ S)-3 $\alpha$ ,4,7,7-Tetramethylperhydronaphtho(8 $\alpha$ ,1- $\beta$ )furan-2-one | C16H26O2                | -0.16               | A:A               | 0.31               | 0.48               |                    | 374               |
| 1,3-Distearoyl-2-elaidoylglycerol                                                                                             | C57H108O6               | -0.16               | A:A               | 0.31               | 0.46               |                    | 375               |
| Sucrose octa-acetate                                                                                                          | C28H38O19               | -0.16               | A:A               | 0.21               | 0.37               |                    | 376               |
| 2,2'-(cyclohexa-2,5-diene-1,4-diylidene)dimalononitrile                                                                       | C12H4N4                 | -0.16               | A:A               | 0.32               | 0.48               |                    | 377               |
| 2,3-Butanedione                                                                                                               | C4H6O2                  | -0.17               | A:A               | 0.30               | 0.47               |                    | 378               |
| Cyclodecanone                                                                                                                 | C10H18O                 | -0.17               | A:A               | 0.31               | 0.48               |                    | 379               |
| Vitamin A acetate                                                                                                             | C22H32O2                | -0.17               | A:A               | 0.31               | 0.49               |                    | 380               |

|                                                                                                                                |               |              |            |             |             |             |            |
|--------------------------------------------------------------------------------------------------------------------------------|---------------|--------------|------------|-------------|-------------|-------------|------------|
| Acetophenone                                                                                                                   | C8H8O         | -0.18        | A:A        | 0.33        | 0.51        |             | 381        |
| 1,10-Phenanthroline                                                                                                            | C12H8N2       | -0.19        | A:A        | 0.34        | 0.53        |             | 382        |
| Coumarin                                                                                                                       | C9H6O2        | -0.19        | A:A        | 0.25        | 0.43        |             | 383        |
| <b>Sorbic acid</b>                                                                                                             | <b>C6H8O2</b> | <b>-0.19</b> | <b>A:A</b> | <b>0.33</b> | <b>0.51</b> | <b>0.08</b> | <b>384</b> |
| (-)-1,3,3-Trimethyl-2-norbornanone                                                                                             | C10H16O       | -0.20        | A:A        | 0.28        | 0.48        |             | 385        |
| 1,2-Dicyclopropylethane-1,2-dione                                                                                              | C8H10O2       | -0.20        | A:A        | 0.27        | 0.47        |             | 386        |
| n-Butyl acetate                                                                                                                | C6H12O2       | -0.20        | A:A        | 0.23        | 0.43        |             | 387        |
| Benzophenone                                                                                                                   | C13H10O       | -0.21        | A:A        | 0.27        | 0.48        |             | 388        |
| 4-Methylmorpholine                                                                                                             | C5H11NO       | -0.21        | A:A        | 0.19        | 0.40        |             | 389        |
| 1,2-Distearoyl-3-elaidoylglycerol                                                                                              | C57H108O6     | -0.22        | A:A        | 0.25        | 0.48        |             | 390        |
| 3 $\alpha$ ,4,7,7-Tetramethyl-(3 $\alpha$ R,4S,6 $\alpha$ R,10 $\alpha$ S)-perhydronaphtho(8 $\alpha$ ,1- $\beta$ )furan-2-one | C16H26O2      | -0.22        | A:A        | 0.30        | 0.51        |             | 391        |
| Acridine                                                                                                                       | C13H9N        | -0.22        | A:A        | 0.24        | 0.46        |             | 392        |
| Cycloundecanone                                                                                                                | C11H20O       | -0.22        | A:A        | 0.23        | 0.45        |             | 393        |
| Tricyclopropylamine                                                                                                            | C9H15N        | -0.22        | A:A        | 0.23        | 0.45        |             | 394        |
| (3 $\alpha$ R,4S,6 $\alpha$ S,10 $\alpha$ S)-3 $\alpha$ ,4,7,7-Tetramethylperhydronaphtho(8 $\alpha$ ,1- $\beta$ )furan-2-one  | C16H26O2      | -0.23        | A:A        | 0.22        | 0.45        |             | 395        |
| 2,3,5,6-Tetrafluoro-7,7,8,8-tetracyanoquinodimethane                                                                           | C12F4N4       | -0.24        | A:A        | 0.24        | 0.48        |             | 396        |
| Dimethyl succinate                                                                                                             | C6H10O4       | -0.24        | A:A        | 0.22        | 0.46        |             | 397        |
| 1,4-Dimethylpiperazine                                                                                                         | C6H14N2       | -0.24        | A:A        | 0.19        | 0.43        |             | 398        |
| Phenazine                                                                                                                      | C12H8N2       | -0.26        | A:A        | 0.25        | 0.52        |             | 399        |
| Ethyl Propionate                                                                                                               | C5H10O2       | -0.27        | A:A        | 0.22        | 0.48        |             | 400        |
| Oxetane                                                                                                                        | C3H6O         | -0.27        | A:A        | 0.08        | 0.35        |             | 401        |
| 1-(4-Methoxyphenyl)ethan-1-one                                                                                                 | C9H10O2       | -0.27        | A:A        | 0.16        | 0.42        |             | 402        |
| 1,3,5-Trinitrobenzene                                                                                                          | C6H3N3O6      | -0.28        | A:A        | 0.22        | 0.50        |             | 403        |
| 3,4-(Methylenedioxy)benzaldehyde                                                                                               | C8H6O3        | -0.28        | A:A        | 0.14        | 0.42        |             | 404        |
| Dibenzoyl peroxide                                                                                                             | C14H10O4      | -0.28        | A:A        | 0.17        | 0.44        |             | 405        |
| (Z)-Ethyl 2-benzylidene-3-oxobutanoate                                                                                         | C13H14O3      | -0.29        | A:A        | 0.16        | 0.44        |             | 406        |
| 4-tert-Butyl-3-methoxy-2,6-dinitrotoluene                                                                                      | C12H16N2O5    | -0.29        | A:A        | 0.20        | 0.49        |             | 407        |
| 1-(Naphthalen-2-yl)Ethan-1-One                                                                                                 | C12H10O       | -0.30        | A:A        | 0.15        | 0.45        |             | 408        |
| $\beta$ -Tristearin                                                                                                            | C57H110O6     | -0.30        | A:A        | 0.12        | 0.42        |             | 409        |
| 1,3-Diphenylpropan-2-one                                                                                                       | C15H14O       | -0.31        | A:A        | 0.19        | 0.50        |             | 410        |
| 4-Methoxybenzaldehyde                                                                                                          | C8H8O2        | -0.31        | A:A        | 0.11        | 0.43        |             | 411        |
| cis-anti-cis-Dicyclohexano-18-crown-6                                                                                          | C20H36O6      | -0.31        | A:A        | 0.04        | 0.35        |             | 412        |
| Nootkatone                                                                                                                     | C15H22O       | -0.31        | A:A        | 0.13        | 0.44        |             | 413        |
| (1S,6R,10R)-(+)-6-Methyl-4-oxabicyclo(8.4.1)pentadecan-3-one                                                                   | C15H26O2      | -0.32        | A:A        | 0.13        | 0.44        |             | 414        |
| (4R,7S)-7-Isopropyl-4-methyloxepan-2-one                                                                                       | C10H18O2      | -0.32        | A:A        | 0.23        | 0.55        |             | 415        |
| 2-Methoxy-4-(1-(E)-propenyl)phenyl acetate                                                                                     | C12H14O3      | -0.32        | A:A        | 0.10        | 0.42        |             | 416        |
| 4-Allyl-2-methoxyphenyl benzoate                                                                                               | C17H16O3      | -0.32        | A:A        | 0.21        | 0.53        |             | 417        |
| Methyl benzoate                                                                                                                | C8H8O2        | -0.32        | A:A        | 0.17        | 0.49        |             | 418        |
| L-Carvone                                                                                                                      | C10H14O       | -0.33        | A:A        | 0.13        | 0.46        |             | 419        |
| Methyl cubane-1-carboxylate                                                                                                    | C10H10O2      | -0.33        | A:A        | 0.14        | 0.47        |             | 420        |

|                                                                   |                      |                     |                   |                    |                    |                   |
|-------------------------------------------------------------------|----------------------|---------------------|-------------------|--------------------|--------------------|-------------------|
| Phenyl acetate                                                    | C8H8O2               | -0.34               | A:A               | 0.16               | 0.50               | 421               |
| Tetraiodoethene                                                   | C2I4                 | -0.34               | A:A               | 0.17               | 0.51               | 422               |
| Tetrabromomethane                                                 | CBr4                 | -0.35               | A:A               | 0.02               | 0.37               | 423               |
| Dichlorodifluoromethane                                           | CCl2F2               | -0.36               | A:A               | 0.03               | 0.39               | 424               |
| 2-Methoxynaphthalene                                              | C11H10O              | -0.38               | A:A               | 0.08               | 0.46               | 425               |
| 1,2-Dimethoxybenzene                                              | C8H10O2              | -0.39               | A:A               | 0.05               | 0.45               | 426               |
| <b><i>1,3-Diiodobenzene<sup>CSD</sup></i></b>                     | <b><i>C6H4I2</i></b> | <b><i>-0.40</i></b> | <b><i>A:A</i></b> | <b><i>0.03</i></b> | <b><i>0.43</i></b> | <b><i>427</i></b> |
| 1-Chloro-1,1,2,2,2-pentafluoroethane                              | C2ClF5               | -0.40               | A:A               | 0.05               | 0.45               | 428               |
| bis(Methylthio)methane                                            | C3H8S2               | -0.40               | A:A               | 0.06               | 0.46               | 429               |
| Chlorine                                                          | Cl2                  | -0.40               | A:A               | 0.03               | 0.43               | 430               |
| Ethyl(methyl)sulfane                                              | C3H8S                | -0.40               | A:A               | 0.07               | 0.47               | 431               |
| Ethylene oxide                                                    | C2H4O                | -0.40               | A:A               | 0.04               | 0.44               | 432               |
| Eucalyptol                                                        | C10H18O              | -0.40               | A:A               | 0.06               | 0.46               | 433               |
| <b><i>1,2,4,5-Tetrafluoro-3,6-diiodobenzene<sup>CSD</sup></i></b> | <b><i>C6F4I2</i></b> | <b><i>-0.41</i></b> | <b><i>A:A</i></b> | <b><i>0.12</i></b> | <b><i>0.53</i></b> | <b><i>434</i></b> |
| 1,4-Dimethoxybenzene                                              | C8H10O2              | -0.41               | A:A               | 0.09               | 0.50               | 435               |
| Dimethylsulfide                                                   | C2H6S                | -0.41               | A:A               | 0.06               | 0.47               | 436               |
| 1,2-Dichloroethane                                                | C2H4Cl2              | -0.42               | A:A               | 0.05               | 0.47               | 437               |
| 1,4-Dithiane                                                      | C4H8S2               | -0.43               | A:A               | 0.04               | 0.47               | 438               |
| Tetrathiafulvalene                                                | C6H4S4               | -0.43               | A:A               | 0.01               | 0.44               | 439               |
| 1,2-bis(Methylthio)ethane                                         | C4H10S2              | -0.44               | A:A               | 0.05               | 0.49               | 440               |
| Diallyldisulfide                                                  | C6H10S2              | -0.44               | A:A               | 0.01               | 0.45               | 441               |
| Diallylsulfide                                                    | C6H10S               | -0.44               | A:A               | 0.01               | 0.45               | 442               |
| 1,2-Dibenzylsulfane                                               | C14H14S2             | -0.45               | A:A               | 0.01               | 0.46               | 443               |
| <b><i>Dichloromethane<sup>CSD</sup></i></b>                       | <b><i>CH2Cl2</i></b> | <b><i>-0.46</i></b> | <b><i>A:A</i></b> | <b><i>0.06</i></b> | <b><i>0.51</i></b> | <b><i>444</i></b> |
| 1,2-Dimethyldisulfane                                             | C2H6S2               | -0.46               | A:A               | 0.04               | 0.50               | 445               |
| Diphenyl ether                                                    | C12H10O              | -0.46               | A:A               | 0.01               | 0.48               | 446               |
| Caryophyllen- $\alpha$ -oxide                                     | C15H24O              | -0.47               | A:A               | 0.02               | 0.49               | 447               |
| 1,2-Diphenyldisulfane                                             | C12H10S2             | -0.47               | A:A               | 0.01               | 0.48               | 448               |
| Chloroform                                                        | CHCl3                | -0.48               | A:A               | 0.00               | 0.48               | 449               |
| <b><i>Toluene<sup>CSD</sup></i></b>                               | <b><i>C7H8</i></b>   | <b><i>*</i></b>     | <b><i>A:A</i></b> |                    | <b><i>0.44</i></b> | <b><i>*</i></b>   |

\*Toluene does not exhibit donor or acceptor groups and, so, it is not possible to calculate the HBP score.

Table S4 – Coordination value results for a multicomponent analysis of 450 co-formers against NVP molecule. Molecules are ordered by CV ranking position. In bold are represented the 76 molecules for which experimental multicomponent results are available. Black-italic letter identify the positive results; CSD means molecules reported in the CSD database. Red-underline letter identify the negative results.

| Co-former                        | Molecular formula    | CV score             | CV ranking      |
|----------------------------------|----------------------|----------------------|-----------------|
| Cyclohexane-1,4-diamine          | C6H14N2              | -1.143               | 1               |
| (+)-Camphoric acid               | C10H16O4             | -1.139               | 2               |
| 4-Ethoxyphenol                   | C8H10O2              | -1.134               | 3               |
| <b><i>Cinnamide</i></b>          | <b><i>C9H9NO</i></b> | <b><i>-1.134</i></b> | <b><i>4</i></b> |
| 1-Hydroxydiamantane              | C14H20O              | -1.129               | 5               |
| DL-Glutamine                     | C5H10N2O3            | -1.129               | 6               |
| 2,6-Di-tert-butyl-4-methylphenol | C15H24O              | -1.126               | 7               |
| <b><i>Propionamide</i></b>       | <b><i>C3H7NO</i></b> | <b><i>-1.126</i></b> | <b><i>8</i></b> |
| L-Lysine                         | C6H14N2O2            | -1.100               | 9               |
| 1,2-Ethanedithiol                | C2H6S2               | -1.099               | 10              |

|                                                              |                         |                      |                  |
|--------------------------------------------------------------|-------------------------|----------------------|------------------|
| 2,5,5,8α-Tetramethyloctahydro-2H-2,4α-methanonaphthalen-1-ol | C15H26O                 | -1.099               | 11               |
| Butyramide                                                   | C4H9NO                  | -1.093               | 12               |
| D-Threonine                                                  | C4H9NO3                 | -1.079               | 13               |
| <b><u>L-Aspartic acid</u></b>                                | <b><u>C4H7NO4</u></b>   | <b><u>-1.076</u></b> | <b><u>14</u></b> |
| 1,11-Undecanediol                                            | C11H24O2                | -1.073               | 15               |
| <b><u>DL-Malic acid</u></b>                                  | <b><u>C4H6O5</u></b>    | <b><u>-1.069</u></b> | <b><u>16</u></b> |
| Phenol                                                       | C6H6O                   | -1.064               | 17               |
| 2-(Tert-butyl)-4-methoxyphenol                               | C11H16O2                | -1.062               | 18               |
| Glycerol                                                     | C3H8O3                  | -1.059               | 19               |
| 1,13-Tridecanediol                                           | C13H28O2                | -1.019               | 20               |
| DL-Tyrosine                                                  | C9H11NO3                | -1.018               | 21               |
| <b><u>L-Glutamine</u></b>                                    | <b><u>C5H10N2O3</u></b> | <b><u>-1.014</u></b> | <b><u>22</u></b> |
| L-Threonine                                                  | C4H9NO3                 | -1.013               | 23               |
| L-Tyrosine                                                   | C9H11NO3                | -1.010               | 24               |
| Trimesic acid                                                | C9H6O6                  | -1.001               | 25               |
| cis,cis-1,3,5-Cyclohexanetricarboxylic acid                  | C9H12O6                 | -0.996               | 26               |
| 2,2'-Dihydroxy-5,5'-diallyl-biphenyl                         | C18H18O2                | -0.990               | 27               |
| 13-epi-Sclareol                                              | C20H36O2                | -0.987               | 28               |
| cis-Aconitic acid                                            | C6H6O6                  | -0.985               | 29               |
| (R)-2-Hydroxypropanamide                                     | C3H7NO2                 | -0.974               | 30               |
| (S)-2-Hydroxypropanamide                                     | C3H7NO2                 | -0.969               | 31               |
| 1,3-Propanedithiol                                           | C3H8S2                  | -0.968               | 32               |
| 1,1'-Azo-bis(carbamide)                                      | C2H4N4O2                | -0.968               | 33               |
| Lactic acid                                                  | C3H6O3                  | -0.962               | 34               |
| 1-Naphthol                                                   | C10H8O                  | -0.959               | 35               |
| 2,4,6-Trimethylphenol                                        | C9H12O                  | -0.955               | 36               |
| 4-(Hydroxymethyl)-2-methoxyphenol                            | C8H10O3                 | -0.950               | 37               |
| Sebacic acid                                                 | C10H18O4                | -0.942               | 38               |
| 2-Isopropyl-5-methylphenol                                   | C10H14O                 | -0.935               | 39               |
| 2,5-Dimethylphenol                                           | C8H10O                  | -0.935               | 40               |
| Cyclamic acid                                                | C6H13NO3S               | -0.932               | 41               |
| o-Cresol                                                     | C7H8O                   | -0.930               | 42               |
| D-Lysine                                                     | C6H14N2O2               | -0.919               | 43               |
| Vanillic acid                                                | C8H8O4                  | -0.914               | 44               |
| <b><u>Ferulic acid</u></b>                                   | <b><u>C10H10O4</u></b>  | <b><u>-0.885</u></b> | <b><u>45</u></b> |
| Tromethamine                                                 | C4H11NO3                | -0.883               | 46               |
| <b><u>Suberic acid</u></b>                                   | <b><u>C8H14O4</u></b>   | <b><u>-0.862</u></b> | <b><u>47</u></b> |
| D-Asparagine                                                 | C4H8N2O3                | -0.858               | 48               |
| <b><u>L-Malic acid</u></b>                                   | <b><u>C4H6O5</u></b>    | <b><u>-0.851</u></b> | <b><u>49</u></b> |
| D-Glucono-1,5-lactone                                        | C6H10O6                 | -0.846               | 50               |
| Pterostilbene                                                | C16H16O3                | -0.843               | 51               |
| <b><i>3-Hydroxybenzoic acid</i><sup>CSD</sup></b>            | <b><i>C7H6O3</i></b>    | <b><i>-0.841</i></b> | <b><i>52</i></b> |
| Biotin                                                       | C10H16N2O3S             | -0.827               | 53               |
| 4-(Hydroxymethyl)phenol                                      | C7H8O2                  | -0.809               | 54               |
| <b><u>Hippuric acid</u></b>                                  | <b><u>C9H9NO3</u></b>   | <b><u>-0.808</u></b> | <b><u>55</u></b> |
| <b><i>4-Hydroxybenzoic acid</i><sup>CSD</sup></b>            | <b><i>C7H6O3</i></b>    | <b><i>-0.808</i></b> | <b><i>56</i></b> |

|                                                                |                        |                      |                  |
|----------------------------------------------------------------|------------------------|----------------------|------------------|
| L-Cystine                                                      | C6H12N2O4S2            | -0.793               | 57               |
| <b><u>Benzamide</u></b>                                        | <b><u>C7H7NO</u></b>   | <b><u>-0.782</u></b> | <b><u>58</u></b> |
| 2,2',2''-Nitrilotriethanol                                     | C6H15NO3               | -0.777               | 59               |
| 2-Hydroxyacetamide                                             | C2H5NO2                | -0.763               | 60               |
| Terephthalic acid                                              | C8H6O4                 | -0.741               | 61               |
| 2-Coumaric acid                                                | C9H8O3                 | -0.738               | 62               |
| Ethylene glycol                                                | C2H6O2                 | -0.726               | 63               |
| <b><i>Gentisic acid</i><sup>CSD</sup></b>                      | <b><i>C7H6O4</i></b>   | <b><i>-0.718</i></b> | <b><i>64</i></b> |
| 2,4-Dihydroxybenzoic acid                                      | C7H6O4                 | -0.710               | 65               |
| <b><i>Adipic acid</i></b>                                      | <b><i>C10H18</i></b>   | <b><i>-0.703</i></b> | <b><i>66</i></b> |
| L-Tryptophan                                                   | C11H12N2O2             | -0.698               | 67               |
| 1,7,7-Trimethyltricyclo(2.2.1.0 <sup>2,6</sup> )heptan-4-ol    | C10H16O                | -0.689               | 68               |
| L-Asparagine                                                   | C4H8N2O3               | -0.672               | 69               |
| 4,4,7-Trimethyldecahydro-1H-cyclopenta[cd]inden-7-ol           | C14H24O                | -0.625               | 70               |
| <b><u>L-Tartaric acid</u></b>                                  | <b><u>C4H6O6</u></b>   | <b><u>-0.616</u></b> | <b><u>71</u></b> |
| 1,6-Hexanedithiol                                              | C6H14S2                | -0.615               | 72               |
| <b><i>Maleic Acid</i><sup>CSD</sup></b>                        | <b><i>C4H4O4</i></b>   | <b><i>-0.609</i></b> | <b><i>73</i></b> |
| Pyrrrole                                                       | C4H5N                  | -0.604               | 74               |
| <b><i>Tartaric acid</i><sup>CSD</sup></b>                      | <b><i>C4H6O6</i></b>   | <b><i>-0.590</i></b> | <b><i>75</i></b> |
| (1R,2R)-Cyclohexane-1,2-Diamine                                | C6H14N2                | -0.585               | 76               |
| DL-Tryptophan                                                  | C11H12N2O2             | -0.569               | 77               |
| 3,3'-Thiodipropionic acid                                      | C6H10O4S               | -0.543               | 78               |
| Adamantane-1,3,5,7-tetracarboxylic acid                        | C14H16O8               | -0.542               | 79               |
| 4-Aminobenzamide                                               | C7H8N2O                | -0.536               | 80               |
| Acetamide                                                      | C2H5NO                 | -0.527               | 81               |
| Cyclodecanol                                                   | C10H20O                | -0.523               | 82               |
| <b><u>Succinamide</u></b>                                      | <b><u>C4H8N2O2</u></b> | <b><u>-0.517</u></b> | <b><u>83</u></b> |
| <b><i>Glutaric acid</i><sup>CSD</sup></b>                      | <b><i>C5H8O4</i></b>   | <b><i>-0.505</i></b> | <b><i>84</i></b> |
| <b><i>Glutamic acid</i></b>                                    | <b><i>C5H9NO4</i></b>  | <b><i>-0.504</i></b> | <b><i>85</i></b> |
| Isocaryolan-9 $\alpha$ -ol                                     | C15H26O                | -0.494               | 86               |
| Ethylenediamine                                                | C2H8N2                 | -0.490               | 87               |
| <b><i>L-Mandelic acid</i></b>                                  | <b><i>C8H8O3</i></b>   | <b><i>-0.455</i></b> | <b><i>88</i></b> |
| 2-Methylpropan-2-ol                                            | C4H10O                 | -0.438               | 89               |
| 1-Hydroxy-2-naphthoic acid                                     | C11H8O3                | -0.435               | 90               |
| L-Cysteine                                                     | C3H7NO2S               | -0.425               | 91               |
| L-Cysteine                                                     | C3H7NO2S               | -0.425               | 92               |
| $\alpha$ -D-Talose                                             | C6H12O6                | -0.415               | 93               |
| 1,8-Octanedithiol                                              | C8H18S2                | -0.413               | 94               |
| 1,1,6,6-Tetraphenylhexa-2,4-diyne-1,6-diol                     | C30H22O2               | -0.400               | 95               |
| <b><i>Citric acid</i></b>                                      | <b><i>C6H8O7</i></b>   | <b><i>-0.400</i></b> | <b><i>96</i></b> |
| 3 $\beta$ ,12 $\beta$ -Dihydroxy-5 $\beta$ -cholan-24-oic acid | C24H40O4               | -0.393               | 97               |
| 4-Acetamidobenzoic acid                                        | C9H9NO3                | -0.373               | 98               |
| DL-Valine                                                      | C5H11NO2               | -0.362               | 99               |
| Formamide                                                      | CH3NO                  | -0.357               | 100              |
| Meso-Tartaric acid                                             | C4H6O6                 | -0.355               | 101              |
| Ibuprofen                                                      | C13H18O2               | -0.349               | 102              |

|                                                |                        |                      |                   |
|------------------------------------------------|------------------------|----------------------|-------------------|
| Phenyl 2-Hydroxybenzoate                       | C13H10O3               | -0.344               | 103               |
| Linoleic acid                                  | C18H32O2               | -0.337               | 104               |
| Butan-2-ol                                     | C4H10O                 | -0.333               | 105               |
| <b><u>Stearic acid</u></b>                     | <b><u>C18H36O2</u></b> | <b><u>-0.322</u></b> | <b><u>106</u></b> |
| 1,9-Nonanedithiol                              | C9H20S2                | -0.322               | 107               |
| <b>4-Aminobenzoic acid</b>                     | <b>C7H7NO2</b>         | <b>-0.311</b>        | <b>108</b>        |
| <b>Salicylic acid<sup>CSD</sup></b>            | <b>C7H6O3</b>          | <b>-0.309</b>        | <b>109</b>        |
| n-Hexadecanol                                  | C16H34O                | -0.303               | 110               |
| (R,S)-Hesperetin                               | C16H14O6               | -0.299               | 111               |
| [1,1'-Biphenyl]-4,4'-diol                      | C12H10O2               | -0.296               | 112               |
| <b><u>Orcinol</u></b>                          | <b><u>C7H8O2</u></b>   | <b><u>-0.295</u></b> | <b><u>113</u></b> |
| <b>Malonic acid</b>                            | <b>C3H4O4</b>          | <b>-0.293</b>        | <b>114</b>        |
| <b><u>Hydroquinone</u></b>                     | <b><u>C6H6O2</u></b>   | <b><u>-0.286</u></b> | <b><u>115</u></b> |
| <b><u>Resorcinol</u></b>                       | <b><u>C6H6O2</u></b>   | <b><u>-0.285</u></b> | <b><u>116</u></b> |
| Palmitic Acid                                  | C16H32O2               | -0.283               | 117               |
| 2-Aminoethan-1-ol                              | C2H7NO                 | -0.282               | 118               |
| 2-Acetylpyrrole                                | C6H7NO                 | -0.280               | 119               |
| [1,1'-Binaphthalene]-2,2'-diol                 | C20H14O2               | -0.276               | 120               |
| DL-Serine                                      | C3H7NO3                | -0.269               | 121               |
| D-Isoleucine                                   | C6H13NO2               | -0.268               | 122               |
| Allocinnamic acid                              | C9H8O2                 | -0.267               | 123               |
| <b><u>Glycolic acid</u></b>                    | <b><u>C2H4O3</u></b>   | <b><u>-0.260</u></b> | <b><u>124</u></b> |
| Anthranilic acid                               | C7H7NO2                | -0.259               | 125               |
| Tetradecanoic acid                             | C14H28O2               | -0.257               | 126               |
| 1,1-bis(4-Hydroxyphenyl)cyclohexane            | C18H20O2               | -0.253               | 127               |
| Carbamazepine                                  | C15H12N2O              | -0.250               | 128               |
| (-)-Epicedrol                                  | C15H26O                | -0.244               | 129               |
| <b><u>DL-Aspartic acid</u></b>                 | <b><u>C4H7NO4</u></b>  | <b><u>-0.241</u></b> | <b><u>130</u></b> |
| Sucralose                                      | C12H19Cl3O8            | -0.224               | 131               |
| Chloranilic acid                               | C6H2Cl2O4              | -0.222               | 132               |
| iso-Deoxycholic acid                           | C24H40O4               | -0.218               | 133               |
| Methyl paraben                                 | C8H8O3                 | -0.216               | 134               |
| 2-Amino-5-methylbenzoic acid                   | C8H9NO2                | -0.212               | 135               |
| (5-Hydroxy-6-methylpyridine-3,4-diy)dimethanol | C8H11NO3               | -0.194               | 136               |
| <b><u>Catechol</u></b>                         | <b><u>C6H6O2</u></b>   | <b><u>-0.180</u></b> | <b><u>137</u></b> |
| Decanoic acid                                  | C10H20O2               | -0.177               | 138               |
| Undecanoic Acid                                | C11H22O2               | -0.176               | 139               |
| <b>Octanol<sup>CSD</sup></b>                   | <b>C8H18O</b>          | <b>-0.165</b>        | <b>140</b>        |
| <b><u>Succinic acid</u></b>                    | <b><u>C4H6O4</u></b>   | <b><u>-0.165</u></b> | <b><u>141</u></b> |
| Cholic acid                                    | C24H40O5               | -0.151               | 142               |
| 3-Methylbut-2-enoic acid                       | C5H8O2                 | -0.150               | 143               |
| $\beta$ -D-Psicose                             | C6H12O6                | -0.148               | 144               |
| <b>Urea</b>                                    | <b>CH4N2O</b>          | <b>-0.137</b>        | <b>145</b>        |
| Phenylmethanethiol                             | C7H8S                  | -0.134               | 146               |
| <b>Heptanol<sup>CSD</sup></b>                  | <b>C7H16O</b>          | <b>-0.128</b>        | <b>147</b>        |
| Nonanoic acid                                  | C9H18O2                | -0.124               | 148               |

|                                                    |               |               |            |
|----------------------------------------------------|---------------|---------------|------------|
| Tramadol                                           | C16H25NO2     | -0.120        | 149        |
| Octanoic acid                                      | C8H16O2       | -0.117        | 150        |
| 2-Phenylacetic acid                                | C8H8O2        | -0.103        | 151        |
| Pentadecanoic acid                                 | C15H30O2      | -0.097        | 152        |
| <b>Oxalic acid</b>                                 | <b>C2H2O4</b> | <b>-0.093</b> | <b>153</b> |
| β-DL-Arabinose                                     | C5H10O5       | -0.091        | 154        |
| <b>Hexanol<sup>CSD</sup></b>                       | <b>C6H14O</b> | <b>-0.090</b> | <b>155</b> |
| 1-Amino-1-methylcyclopropane                       | C4H9N         | -0.089        | 156        |
| (2R,3R)-2,3-Dimethylcyclopropane-1-carboxylic acid | C6H10O2       | -0.081        | 157        |
| Heptanoic acid                                     | C7H14O2       | -0.081        | 158        |
| Hexan-1-amine                                      | C6H15N        | -0.080        | 159        |
| Pentan-1-amine                                     | C5H13N        | -0.079        | 160        |
| <b>Benzoic acid<sup>CSD</sup></b>                  | <b>C7H6O2</b> | <b>-0.058</b> | <b>161</b> |
| Tridecanoic Acid                                   | C13H26O2      | -0.053        | 162        |
| Phenylmethanol                                     | C7H8O         | -0.033        | 163        |
| DL-Glutamic acid                                   | C5H9NO4       | -0.031        | 164        |
| Cyclobutanol                                       | C4H8O         | -0.030        | 165        |
| β-L-Lyxopyranose                                   | C5H10O5       | -0.019        | 166        |
| Hexanoic acid                                      | C6H12O2       | -0.017        | 167        |
| DL-Cysteine                                        | C3H7NO2S      | -0.015        | 168        |
| Lauric acid                                        | C12H24O2      | -0.012        | 169        |
| <b>n-Butanol<sup>CSD</sup></b>                     | <b>C4H10O</b> | <b>-0.009</b> | <b>170</b> |
| Methanol                                           | CH4O          | 0.002         | 171        |
| Butan-1-amine                                      | C4H11N        | 0.009         | 172        |
| DL-Isoleucine                                      | C6H13NO2      | 0.020         | 173        |
| <b>Sorbic acid</b>                                 | <b>C6H8O2</b> | <b>0.027</b>  | <b>174</b> |
| Propan-1-amine                                     | C3H9N         | 0.032         | 175        |
| DL-Ribose                                          | C5H10O5       | 0.046         | 176        |
| <b>L-Ascorbic acid</b>                             | <b>C6H8O6</b> | <b>0.056</b>  | <b>177</b> |
| L-Ribose                                           | C5H10O5       | 0.056         | 178        |
| o-Anisic acid                                      | C8H8O3        | 0.093         | 179        |
| β-D-Gulose                                         | C6H12O6       | 0.097         | 180        |
| <b>Fumaric acid</b>                                | <b>C4H4O4</b> | <b>0.103</b>  | <b>181</b> |
| Butyric acid                                       | C4H8O2        | 0.117         | 182        |
| Lidocaine                                          | C18H32O2      | 0.117         | 183        |
| Thiourea                                           | CH4N2S        | 0.123         | 184        |
| β-D-Glucose                                        | C6H12O6       | 0.124         | 185        |
| 2,2,2-Trifluoroethanol                             | C2H3F3O       | 0.126         | 186        |
| Crotonic acid                                      | C4H6O2        | 0.130         | 187        |
| α-L-Xylopyranose                                   | C5H10O5       | 0.140         | 188        |
| D-Glucuronic acid                                  | C6H10O7       | 0.147         | 189        |
| <b>Cinnamic acid</b>                               | <b>C9H8O2</b> | <b>0.156</b>  | <b>190</b> |
| Ethylamine                                         | C2H7N         | 0.164         | 191        |
| Acetylmethionine                                   | C7H13NO3S     | 0.189         | 192        |
| Pyrimethamine                                      | C12H13ClN4    | 0.190         | 193        |
| β-D-Galactose                                      | C6H12O6       | 0.193         | 194        |

|                                                               |                        |                       |                     |
|---------------------------------------------------------------|------------------------|-----------------------|---------------------|
| $\alpha$ -D-Glucose                                           | C6H12O6                | 0.224                 | 195                 |
| 2,6-Pyridinedicarboxylic acid                                 | C7H5NO4                | 0.230                 | 196                 |
| Proline                                                       | C5H9NO2                | 0.233                 | 197                 |
| Xylitol                                                       | C5H12O5                | 0.246                 | 198                 |
| Imidazole                                                     | C3H4N2                 | 0.259                 | 199                 |
| Trifluoroacetic acid                                          | C2HF3O2                | 0.281                 | 200                 |
| DL-Arabinitol                                                 | C5H12O5                | 0.293                 | 201                 |
| Acetic acid                                                   | C2H4O2                 | 0.293                 | 202                 |
| <b>L-Proline</b>                                              | <b>C5H9NO2</b>         | <b>0.296</b>          | <b>203</b>          |
| 4-(4-Hydroxyphenyl)butan-2-one                                | C10H12O2               | 0.298                 | 204                 |
| $\alpha$ -D-Galactose                                         | C6H12O6                | 0.312                 | 205                 |
| D-Arabinitol                                                  | C5H12O5                | 0.313                 | 206                 |
| o- $\beta$ -D-Mannopyranosyl-(1-4)- $\alpha$ -D-mannopyranose | C12H22O11              | 0.330                 | 207                 |
| $\beta$ -D-Altropyranose                                      | C6H12O6                | 0.332                 | 208                 |
| 4-Methoxybenzoic acid                                         | C8H8O3                 | 0.333                 | 209                 |
| Phenoxyacetic acid                                            | C8H8O3                 | 0.371                 | 210                 |
| 1-Pentanol                                                    | C5H12O                 | 0.382                 | 211                 |
| 4-Nitrophenol                                                 | C6H5NO3                | 0.382                 | 212                 |
| <b><u>Phloroglucinol</u></b>                                  | <b><u>C6H6O3</u></b>   | <b><u>0.397</u></b>   | <b><u>213</u></b>   |
| n-Methyl-D-glucamine                                          | C7H17NO5               | 0.398                 | 214                 |
| $\beta$ -D-Allose                                             | C6H12O6                | 0.400                 | 215                 |
| 2-Chloroacetic acid                                           | C2H3ClO2               | 0.419                 | 216                 |
| <b><u>L-Valine</u></b>                                        | <b><u>C5H11NO2</u></b> | <b><u>0.426</u></b>   | <b><u>217</u></b>   |
| 4'-Hydroxyacetophenone                                        | C8H8O2                 | 0.442                 | 218                 |
| $\beta$ -D-Fructopyranose                                     | C6H12O6                | 0.465                 | 219                 |
| Ribitol                                                       | C5H12O5                | 0.501                 | 220                 |
| DL-Leucine                                                    | C6H13NO2               | 0.535                 | 221                 |
| <b><i>Ethanol</i><sup>CSD</sup></b>                           | <b><i>C2H5OH</i></b>   | <b><i>0.538</i></b>   | <b><i>222</i></b>   |
| Sucrose                                                       | C12H22O11              | 0.544                 | 223                 |
| <b><i>Toluene</i><sup>CSD</sup></b>                           | <b><i>C7H8</i></b>     | <b><i>0.575**</i></b> | <b><i>224**</i></b> |
| <b><u>Pyroglutamic acid</u></b>                               | <b><u>C5H7NO3</u></b>  | <b><u>0.579</u></b>   | <b><u>225</u></b>   |
| <b><i>Dichloromethane</i><sup>CSD</sup></b>                   | <b><i>CH2Cl2</i></b>   | <b><i>0.593</i></b>   | <b><i>226</i></b>   |
| L-Leucine                                                     | C6H13NO2               | 0.598                 | 227                 |
| L- $\alpha$ -Leucine                                          | C6H13NO2               | 0.598                 | 228                 |
| Chloroform                                                    | CHCl3                  | 0.604                 | 229                 |
| <b><i><math>\epsilon</math>-Caprolactam</i><sup>CSD</sup></b> | <b><i>C6H11NO</i></b>  | <b><i>0.606</i></b>   | <b><i>230</i></b>   |
| Benzoin                                                       | C14H12O2               | 0.608                 | 231                 |
| <b><u>L-Alanine</u></b>                                       | <b><u>C3H7NO2</u></b>  | <b><u>0.612</u></b>   | <b><u>232</u></b>   |
| L-Methionine                                                  | C5H11NO2S              | 0.619                 | 233                 |
| Tricyclopropylamine                                           | C9H15N                 | 0.623                 | 234                 |
| <b><i>Trichloroacetic acid</i><sup>CSD</sup></b>              | <b><i>C2HCl3O2</i></b> | <b><i>0.623</i></b>   | <b><i>235</i></b>   |
| Diallylsulfide                                                | C6H10S                 | 0.624                 | 236                 |
| 5-Nitroisophthalic acid                                       | C8H5NO6                | 0.628                 | 237                 |
| Ethyl(methyl)sulfane                                          | C3H8S                  | 0.633                 | 238                 |
| D-Alanine                                                     | C3H7NO2                | 0.634                 | 239                 |
| Dimethylsulfide                                               | C2H6S                  | 0.638                 | 240                 |



|                                                            |                 |              |            |
|------------------------------------------------------------|-----------------|--------------|------------|
| 2-Ethyl-3-hydroxy-4H-pyran-4-one                           | C7H8O3          | 0.641        | 241        |
| 4-Hydroxybenzaldehyde                                      | C7H6O2          | 0.646        | 242        |
| <b>Vanillin</b>                                            | <b>C8H8O3</b>   | <b>0.668</b> | <b>243</b> |
| 1-Chloro-1,1,2,2,2-pentafluoroethane                       | C2ClF5          | 0.670        | 244        |
| DL-Methionine                                              | C5H11NO2S       | 0.675        | 245        |
| 1,2-bis(Methylthio)ethane                                  | C4H10S2         | 0.676        | 246        |
| L-chiro-Inositol                                           | C6H12O6         | 0.682        | 247        |
| <b>1,2,4,5-Tetrafluoro-3,6-di-iodobenzene<sup>CS</sup></b> | <b>C6F4I2</b>   | <b>0.682</b> | <b>248</b> |
| bis(Methylthio)methane                                     | C3H8S2          | 0.686        | 249        |
| 1,2-Dichloroethane                                         | C2H4Cl2         | 0.690        | 250        |
| Formic acid                                                | CH2O2           | 0.692        | 251        |
| cis-Inositol                                               | C6H12O6         | 0.699        | 252        |
| 1,4-Dithiane                                               | C4H8S2          | 0.699        | 253        |
| 1,2-Dibenzyldisulfane                                      | C14H14S2        | 0.704        | 254        |
| Diphenyl ether                                             | C12H10O         | 0.704        | 255        |
| Tetrathiafulvalene                                         | C6H4S4          | 0.708        | 256        |
| 1,2-Diphenyldisulfane                                      | C12H10S2        | 0.712        | 257        |
| 2-Pyridone                                                 | C5H5NO          | 0.714        | 258        |
| Allitol                                                    | C6H14O6         | 0.718        | 259        |
| <b>Orotic acid</b>                                         | <b>C5H4N2O4</b> | <b>0.718</b> | <b>260</b> |
| Diallyldisulfide                                           | C6H10S2         | 0.719        | 261        |
| 2-Methoxynaphthalene                                       | C11H10O         | 0.720        | 262        |
| 2-Aminopyrimidine                                          | C4H5N3          | 0.727        | 263        |
| <b>1,3-Diiodobenzene<sup>CS</sup></b>                      | <b>C6H4I2</b>   | <b>0.727</b> | <b>264</b> |
| 1,2-Dimethyldisulfane                                      | C2H6S2          | 0.731        | 265        |
| 1-Naphthalenesulfonic acid                                 | C10H8O3S        | 0.732        | 266        |
| Piperidine                                                 | C5H11N          | 0.735        | 267        |
| $\alpha$ -L-Sorbopyranose                                  | C6H12O6         | 0.746        | 268        |
| Tetraiodoethene                                            | C2I4            | 0.747        | 269        |
| 1,4-Phenylenediamine                                       | C6H8N2          | 0.755        | 270        |
| <b>Acetylsalicylic acid</b>                                | <b>C9H8O4</b>   | <b>0.759</b> | <b>271</b> |
| 4-Hydroxy-3,5-dimethoxybenzaldehyde                        | C9H10O4         | 0.764        | 272        |
| 2,5-Piperazinedione                                        | C4H6N2O2        | 0.769        | 273        |
| <b>Piperazine</b>                                          | <b>C4H10N2</b>  | <b>0.769</b> | <b>274</b> |
| (E)-4-(4-Hydroxy-3-methoxyphenyl)but-3-en-2-one            | C11H12O3        | 0.770        | 275        |
| <b>Gallic acid</b>                                         | <b>C7H6O5</b>   | <b>0.773</b> | <b>276</b> |
| 1,4,8,11-Tetra-azacyclotetradecane                         | C10H24N4        | 0.786        | 277        |
| 1,3-Distearoyl-2-oleoylglycerol                            | C57H108O6       | 0.808        | 278        |
| $\beta$ -Tristearin                                        | C57H110O6       | 0.815        | 279        |
| 2-(Oleoyloxy)propane-1,3-diyl distearate                   | C57H108O6       | 0.816        | 280        |
| $\alpha$ -Ketoglutaric acid                                | C5H6O5          | 0.817        | 281        |
| Dichlorodifluoromethane                                    | CCl2F2          | 0.819        | 282        |
| 1,3-Distearoyl-2-elaidoylglycerol                          | C57H108O6       | 0.820        | 283        |
| 2,4-Pyridinedicarboxylic acid                              | C7H5NO4         | 0.831        | 284        |
| 1,2-Dimethoxybenzene                                       | C8H10O2         | 0.832        | 285        |
| 4-Hydroxy-L-proline                                        | C5H9NO3         | 0.839        | 286        |

|                                                     |                  |              |            |
|-----------------------------------------------------|------------------|--------------|------------|
| 2,2-Dibromo-2-cyanoacetamide                        | C3H2Br2N2O       | 0.839        | 287        |
| 1,1-Dihydroxypropan-2-one                           | C3H6O3           | 0.841        | 288        |
| 1,2-Distearoyl-3-elaidoylglycerol                   | C57H108O6        | 0.847        | 289        |
| α-D-Tagatopyranose                                  | C5H6O3           | 0.850        | 290        |
| D-Iditol                                            | C6H14O6          | 0.851        | 291        |
| Vitamin A acetate                                   | C22H32O2         | 0.861        | 292        |
| β-Alanine                                           | C3H7NO2          | 0.869        | 293        |
| 1,4-Dimethoxybenzene                                | C8H10O2          | 0.870        | 294        |
| Caryophyllen-α-oxide                                | C15H24O          | 0.875        | 295        |
| <b>Uracil</b>                                       | <b>C4H4N2O2</b>  | <b>0.877</b> | <b>296</b> |
| 4-Aminobutanoic acid                                | C4H9NO2          | 0.879        | 297        |
| D-Altritol                                          | C6H14O6          | 0.880        | 298        |
| D-Mannitol                                          | C6H14O6          | 0.891        | 299        |
| myo-Inositol                                        | C6H12O6          | 0.914        | 300        |
| <b>Glycine</b>                                      | <b>C2H5NO2</b>   | <b>0.914</b> | <b>301</b> |
| α-8'-β-Apocarotenal                                 | C30H40O          | 0.929        | 302        |
| 4-Methylbenzenesulfonic acid                        | C7H8O3S          | 0.933        | 303        |
| 4-Nitrobenzoic acid                                 | C7H5NO4          | 0.934        | 304        |
| Tetrabromomethane                                   | CBr4             | 0.935        | 305        |
| Eucalyptol                                          | C10H18O          | 0.936        | 306        |
| β-8'-β-Apocarotenal                                 | C30H40O          | 0.946        | 307        |
| Scyllo-inositol                                     | C6H12O6          | 0.951        | 308        |
| α-Maltose                                           | C12H22O11        | 0.954        | 309        |
| D-Glucitol                                          | C6H14O6          | 0.959        | 310        |
| Galactitol                                          | C6H14O6          | 0.963        | 311        |
| <b>Nicotinamide</b>                                 | <b>C6H6N2O</b>   | <b>0.978</b> | <b>312</b> |
| I-Iditol                                            | C6H14O6          | 0.984        | 313        |
| Ethyl Propionate                                    | C5H10O2          | 0.995        | 314        |
| Chlorine                                            | Cl2              | 1.001        | 315        |
| DL-Mannitol                                         | C6H14O6          | 1.008        | 316        |
| <b>Naphthalene-1,5-disulfonic acid<sup>CS</sup></b> | <b>C10H8S2O6</b> | <b>1.009</b> | <b>317</b> |
| Methyl cubane-1-carboxylate                         | C10H10O2         | 1.027        | 318        |
| <b>Isonicotinamide</b>                              | <b>C6H6N2O</b>   | <b>1.034</b> | <b>319</b> |
| Cycloundecanone                                     | C11H20O          | 1.042        | 320        |
| Ethylene oxide                                      | C2H4O            | 1.043        | 321        |
| Levulinic acid                                      | C5H8O3           | 1.062        | 322        |
| Neotame                                             | C20H30N2O5       | 1.062        | 323        |
| epi-Inositol                                        | C6H12O6          | 1.067        | 324        |
| n-Butyl acetate                                     | C6H12O2          | 1.070        | 325        |
| β-Lactose                                           | C12H22O11        | 1.073        | 326        |
| Oxetane                                             | C3H6O            | 1.075        | 327        |
| Methyl benzoate                                     | C8H8O2           | 1.081        | 328        |
| (1R,2S)-2-Methyl-4-oxocyclohexane-1-carboxylic acid | C8H12O3          | 1.092        | 329        |
| 1,3-Diphenylpropan-2-one                            | C15H14O          | 1.095        | 330        |
| Indomethacin                                        | C19H16ClNO4      | 1.096        | 331        |
| β-Cellobiose                                        | C12H22O11        | 1.102        | 332        |

|                                                                                                                                |                 |              |            |
|--------------------------------------------------------------------------------------------------------------------------------|-----------------|--------------|------------|
| Morpholine                                                                                                                     | C4H9NO          | 1.110        | 333        |
| (1S,6R,10R)-(+)-6-Methyl-4-oxabicyclo(8.4.1)pentadecan-3-one                                                                   | C15H26O2        | 1.115        | 334        |
| 4-Allyl-2-methoxyphenyl benzoate                                                                                               | C17H16O3        | 1.117        | 335        |
| 2,6-Dimethylpyridine                                                                                                           | C7H9N           | 1.126        | 336        |
| Benzophenone                                                                                                                   | C13H10O         | 1.128        | 337        |
| Cyclohexane-1,2,3,4,5,6-hexaol                                                                                                 | C6H12O6         | 1.132        | 338        |
| <b>Ethyl acetate<sup>CSD</sup></b>                                                                                             | <b>C4H8O2</b>   | <b>1.144</b> | <b>339</b> |
| Methyl acetate                                                                                                                 | C3H6O2          | 1.144        | 340        |
| Cyclodecanone                                                                                                                  | C10H18O         | 1.144        | 341        |
| Acridine                                                                                                                       | C13H9N          | 1.156        | 342        |
| $\beta$ -galabiose                                                                                                             | C12H22O11       | 1.157        | 343        |
| (-)-1,3,3-Trimethyl-2-norbornanone                                                                                             | C10H16O         | 1.162        | 344        |
| Tetrahydrofuran                                                                                                                | C4H8O           | 1.163        | 345        |
| 1-Hydroxypropan-2-one                                                                                                          | C3H6O2          | 1.170        | 346        |
| Salicylaldehyde                                                                                                                | C7H6O2          | 1.171        | 347        |
| Chloro(methoxy)methane                                                                                                         | C2H5ClO         | 1.173        | 348        |
| S(+)-Camphor-10-sulfonic acid                                                                                                  | C10H16O4S       | 1.176        | 349        |
| Phenyl acetate                                                                                                                 | C8H8O2          | 1.177        | 350        |
| 2-Methoxy-4-(1-(E)-propenyl)phenyl acetate                                                                                     | C12H14O3        | 1.208        | 351        |
| (3 $\alpha$ R,4R,6 $\alpha$ S,10 $\alpha$ S)-3 $\alpha$ ,4,7,7-Tetramethylperhydronaphtho(8 $\alpha$ ,1- $\beta$ )furan-2-one  | C16H26O2        | 1.220        | 352        |
| 1-(Naphthalen-2-yl)Ethan-1-One                                                                                                 | C12H10O         | 1.236        | 353        |
| Pyruvic acid                                                                                                                   | C3H4O3          | 1.242        | 354        |
| (3 $\alpha$ R,4S,6 $\alpha$ S,10 $\alpha$ S)-3 $\alpha$ ,4,7,7-Tetramethylperhydronaphtho(8 $\alpha$ ,1- $\beta$ )furan-2-one  | C16H26O2        | 1.244        | 355        |
| 3 $\alpha$ ,4,7,7-Tetramethyl-(3 $\alpha$ R,4S,6 $\alpha$ R,10 $\alpha$ S)-perhydronaphtho(8 $\alpha$ ,1- $\beta$ )furan-2-one | C16H26O2        | 1.252        | 356        |
| Benzalacetone                                                                                                                  | C10H10O         | 1.259        | 357        |
| <b>Nicotinic acid</b>                                                                                                          | <b>C6H5NO2</b>  | <b>1.261</b> | <b>358</b> |
| 4-tert-Butyl-3-methoxy-2,6-dinitrotoluene                                                                                      | C12H16N2O5      | 1.265        | 359        |
| (4R,7S)-7-Isopropyl-4-methyloxepan-2-one                                                                                       | C10H18O2        | 1.268        | 360        |
| Acetophenone                                                                                                                   | C8H8O           | 1.271        | 361        |
| Melamine                                                                                                                       | C3H6N6          | 1.283        | 362        |
| Cyclohexane-1,2,3,4,5,6-hexol                                                                                                  | C6H12O6         | 1.289        | 363        |
| <b>3,5-Dinitrosalicylic acid<sup>CSD</sup></b>                                                                                 | <b>C7H4N2O7</b> | <b>1.293</b> | <b>364</b> |
| L-Carvone                                                                                                                      | C10H14O         | 1.300        | 365        |
| 1,2-Ethanedisulfonic acid                                                                                                      | C2H6O6S2        | 1.315        | 366        |
| 3-Isochromanone                                                                                                                | C9H8O2          | 1.329        | 367        |
| Propan-2-one                                                                                                                   | C3H6O           | 1.334        | 368        |
| Phthalide                                                                                                                      | C8H6O2          | 1.342        | 369        |
| 2,4-Dimethylpyridine                                                                                                           | C7H9N           | 1.356        | 370        |
| <b>1,4-Dioxane<sup>CSD</sup></b>                                                                                               | <b>C4H8O2</b>   | <b>1.357</b> | <b>371</b> |
| 1-(4-Methoxyphenyl)ethan-1-one                                                                                                 | C9H10O2         | 1.361        | 372        |
| Muco-inositol                                                                                                                  | C6H12O6         | 1.367        | 373        |
| Coumarin                                                                                                                       | C9H6O2          | 1.371        | 374        |
| Nootkatone                                                                                                                     | C15H22O         | 1.397        | 375        |
| $\alpha$ -Lactose                                                                                                              | C12H22O11       | 1.398        | 376        |
| N,N-Dimethylacetamide                                                                                                          | C4H9NO          | 1.409        | 377        |
| 5,5-Diethylbarbituric acid                                                                                                     | C8H12N2O3       | 1.413        | 378        |

|                                           |                         |                     |                   |
|-------------------------------------------|-------------------------|---------------------|-------------------|
| N-Methylpyrrolidone                       | C5H9NO                  | 1.416               | 379               |
| neo-Inositol                              | C6H12O6                 | 1.418               | 380               |
| Dimethyl succinate                        | C6H10O4                 | 1.420               | 381               |
| 4-Methoxybenzaldehyde                     | C8H8O2                  | 1.449               | 382               |
| Cinnamaldehyde                            | C9H8O                   | 1.451               | 383               |
| 3,5-Dinitrobenzoic acid                   | C7H4N2O6                | 1.453               | 384               |
| Piperine                                  | C17H19NO3               | 1.458               | 385               |
| $\alpha,\alpha$ -Galacto-trehalose        | C12H22O11               | 1.463               | 386               |
| 1,2-Dicyclopropylethane-1,2-dione         | C8H10O2                 | 1.469               | 387               |
| Myricetin                                 | C15H10O8                | 1.476               | 388               |
| <b>Theophylline</b>                       | <b>C7H8N4O2</b>         | <b>1.486</b>        | <b>389</b>        |
| Pyridine                                  | C5H5N                   | 1.486               | 390               |
| 2,2'-Bipyridine                           | C10H8N2                 | 1.496               | 391               |
| Tetramethylpyrazine                       | C8H12N2                 | 1.496               | 392               |
| Nitromethane                              | CH3NO2                  | 1.515               | 393               |
| Cyclohexanone                             | C4H8                    | 1.525               | 394               |
| D-(+)-chiro-Inositol                      | C6H12O6                 | 1.526               | 395               |
| 3-Oxocyclobutanecarboxylic acid           | C5H6O3                  | 1.538               | 396               |
| (Z)-Ethyl 2-benzylidene-3-oxobutanoate    | C13H14O3                | 1.540               | 397               |
| Acrylaldehyde                             | C3H4O                   | 1.543               | 398               |
| Furfural                                  | C6H12O2                 | 1.545               | 399               |
| 3,4-(Methylenedioxy)benzaldehyde          | C8H6O3                  | 1.560               | 400               |
| Trimethylamine                            | C3H9N                   | 1.562               | 401               |
| Dibenzoyl peroxide                        | C14H10O4                | 1.563               | 402               |
| Formaldehyde                              | CH2O                    | 1.566               | 403               |
| 2-Amino-5-picolinic acid                  | C6H6N2O2                | 1.647               | 404               |
| 4-Methylmorpholine                        | C5H11NO                 | 1.668               | 405               |
| <b>Saccharin<sup>CSD</sup></b>            | <b>C7H5NO3S</b>         | <b>1.674</b>        | <b>406</b>        |
| DL-Arginine                               | C6H14N4O2               | 1.693               | 407               |
| <b><u>L-Arginine</u></b>                  | <b><u>C6H14N4O2</u></b> | <b><u>1.693</u></b> | <b><u>408</u></b> |
| Tryphenylphosphine oxide                  | C18H15OP                | 1.719               | 409               |
| 1,10-Phenanthroline                       | C12H8N2                 | 1.722               | 410               |
| N,N-Dimethylformamide                     | C3H7NO                  | 1.739               | 411               |
| $\alpha,\alpha$ -Trehalose                | C12H22O11               | 1.746               | 412               |
| Phenazine                                 | C12H8N2                 | 1.750               | 413               |
| Trimethylamine oxide                      | C3H9NO                  | 1.777               | 414               |
| $\beta$ -Maltose                          | C12H22O11               | 1.858               | 415               |
| 1,4-Dimethylpiperazine                    | C6H14N2                 | 1.910               | 416               |
| 2,3-Butanedione                           | C4H6O2                  | 1.992               | 417               |
| 3S-cis-3,6-Dimethyl-1,4-dioxane-2,5-dione | C6H8O4                  | 1.994               | 418               |
| Dimethylsulfoxide                         | C2H6OS                  | 2.003               | 419               |
| 2,6-Dimethylpyrazine                      | C6H8N2                  | 2.008               | 420               |
| Terephthalaldehyde                        | C8H6O2                  | 2.021               | 421               |
| 2,3-Dimethylpyrazine                      | C6H8N2                  | 2.044               | 422               |
| <b><u>Theobromine</u></b>                 | <b><u>C7H8N4O2</u></b>  | <b><u>2.079</u></b> | <b><u>423</u></b> |
| Dihydrofuran-2,5-dione                    | C4H4O3                  | 2.124               | 424               |

|                                                         |                  |              |            |
|---------------------------------------------------------|------------------|--------------|------------|
| 2,5-Dimethylpyrazine                                    | C6H8N2           | 2.130        | 425        |
| 1,3-Di(pyridin-4-yl)propane                             | C13H14N2         | 2.183        | 426        |
| (E)-4,4'-Diaza stilbene                                 | C12H10N2         | 2.224        | 427        |
| cis-anti-cis-Dicyclohexano-18-crown-6                   | C20H36O6         | 2.241        | 428        |
| 4,4'-Ethene-1,2-diyl dipyridine                         | C12H10N2         | 2.241        | 429        |
| 2,3,5,6-Tetrachlorocyclohexa-2,5-diene-1,4-dione        | C6Cl4O2          | 2.255        | 430        |
| 1,2-bis(4-Pyridyl)ethane                                | C12H10N2         | 2.272        | 431        |
| 1,3,5-Trinitrobenzene                                   | C6H3N3O6         | 2.279        | 432        |
| 1,4-Diazabicyclo[2.2.2]octane                           | C6H12N2          | 2.301        | 433        |
| 4,4'-Bipyridine                                         | C10H8N2          | 2.319        | 434        |
| <b>Picric acid<sup>CSD</sup></b>                        | <b>C6H3N3O7</b>  | <b>2.341</b> | <b>435</b> |
| <b>Caffeine</b>                                         | <b>C8H10N4O2</b> | <b>2.353</b> | <b>436</b> |
| Sucrose octa-acetate                                    | C28H38O19        | 2.384        | 437        |
| Pyrazine                                                | C4H4N2           | 2.451        | 438        |
| 2,2'-(cyclohexa-2,5-diene-1,4-diylidene)dimalononitrile | C12H4N4          | 2.505        | 439        |
| 2,3,5,6-Tetrafluoro-7,7,8,8-tetracyanoquinodimethane    | C12F4N4          | 2.505        | 440        |
| 1,2,4,5-Tetracyanobenzene                               | C10H2N4          | 2.616        | 441        |
| 4-Benzoquinone                                          | C6H4O2           | 2.639        | 442        |
| 2,8,16,20-Tetramethylcalix(4)resorcinarene              | C32H32O8         | 2.693        | 443        |
| Tetracyanoethylene                                      | C6N4             | 2.818        | 444        |
| Quinoxaline-N,N'-dioxide                                | C8H6N2O2         | 2.874        | 445        |
| Pyrazine-1,4-dioxide                                    | C4H4N2O2         | 2.993        | 446        |
| 2,5-bis(4-Pyridyl)-1,3,4-oxadiazole                     | C12H8N4O         | 3.383        | 447        |
| Hexamethylenetetramine                                  | C6H12N4          | 3.427        | 448        |
| Betaine                                                 | C5H10NO2         | 3.558        | 449        |
| Pyromellitic                                            | C10H2O6          | 3.566        | 450        |

\*\*Toluene does not exhibit donor or acceptor groups. Thus, the CV score value obtained reflects only the CV for NVP molecule.

Table S5– Molecular complementarity results for a multicomponent analysis of 450 co-formers against NVP molecule. Molecules are ordered by MC ranking position. In bold are represented the 76 molecules for which experimental multicomponent results are available. Black-italic letter identify the positive results; CSD means molecules reported in the CSD database. Red-underline letter identify the negative results.

| API               | M/L axis ratio | S axis (Å) | S/L axis ratio | dipole moment magnitude (Debye) | fraction of Nitrogen and Oxygen |
|-------------------|----------------|------------|----------------|---------------------------------|---------------------------------|
| <b>Nevirapine</b> | 0.895          | 6.667      | 0.611          | 1.972                           | 0.250                           |

  

| Co-former                                | M/L axis ratio      | M/L axis ratio Delta  (pass < 0.31) | S axis (Å)          | S axis (Å) Delta  (pass < 3.23) | S/L axis ratio      | S/L axis ratio Delta  (pass < 0.275) | dipole moment magnitude (Debye) | dipole moment magnitude (Debye) Delta  (pass < 5.94) | fraction of Nitrogen and Oxygen | fraction of Nitrogen and Oxygen Delta  (pass < 0.294) | PASS/FAIL          | MC score            | MC ranking       |
|------------------------------------------|---------------------|-------------------------------------|---------------------|---------------------------------|---------------------|--------------------------------------|---------------------------------|------------------------------------------------------|---------------------------------|-------------------------------------------------------|--------------------|---------------------|------------------|
| <b><i>Stearic acid</i></b>               | <b><i>0.196</i></b> | <b><i>0.699</i></b>                 | <b><i>4.452</i></b> | <b><i>2.215</i></b>             | <b><i>0.166</i></b> | <b><i>0.445</i></b>                  | <b><i>0.690</i></b>             | <b><i>1.282</i></b>                                  | <b><i>0.100</i></b>             | <b><i>0.150</i></b>                                   | <b><i>FAIL</i></b> | <b><i>3.071</i></b> | <b><i>1</i></b>  |
| n-Hexadecanol                            | 0.200               | 0.695                               | 4.404               | 2.263                           | 0.185               | 0.426                                | 2.269                           | 0.297                                                | 0.059                           | 0.191                                                 | FAIL               | 3.264               | 2                |
| Palmitic Acid                            | 0.215               | 0.680                               | 4.635               | 2.032                           | 0.190               | 0.421                                | 0.763                           | 1.209                                                | 0.111                           | 0.139                                                 | FAIL               | 3.325               | 3                |
| 1,9-Nonanedithiol                        | 0.280               | 0.615                               | 4.417               | 2.250                           | 0.263               | 0.348                                | 0.676                           | 1.296                                                | 0.000                           | 0.250                                                 | FAIL               | 3.341               | 4                |
| 1,8-Octanedithiol                        | 0.327               | 0.568                               | 4.393               | 2.274                           | 0.283               | 0.328                                | 0.000                           | 1.972                                                | 0.000                           | 0.250                                                 | FAIL               | 3.444               | 5                |
| Tetradecanoic acid                       | 0.239               | 0.656                               | 4.681               | 1.986                           | 0.215               | 0.396                                | 0.722                           | 1.250                                                | 0.125                           | 0.125                                                 | FAIL               | 3.549               | 6                |
| Pentadecanoic acid                       | 0.239               | 0.656                               | 4.774               | 1.893                           | 0.212               | 0.399                                | 0.760                           | 1.212                                                | 0.118                           | 0.132                                                 | FAIL               | 3.549               | 7                |
| Tridecanoic Acid                         | 0.271               | 0.624                               | 4.479               | 2.188                           | 0.225               | 0.386                                | 0.744                           | 1.228                                                | 0.133                           | 0.117                                                 | FAIL               | 3.657               | 8                |
| β-Tristearin                             | 0.190               | 0.705                               | 7.157               | 0.490                           | 0.135               | 0.476                                | 0.332                           | 1.640                                                | 0.095                           | 0.155                                                 | FAIL               | 3.699               | 9                |
| 1,2-Distearoyl-3-elaidoylglycerol        | 0.199               | 0.696                               | 6.801               | 0.134                           | 0.130               | 0.481                                | 1.341                           | 0.631                                                | 0.095                           | 0.155                                                 | FAIL               | 3.769               | 10               |
| 1,6-Hexanedithiol                        | 0.385               | 0.510                               | 4.403               | 2.264                           | 0.336               | 0.275                                | 0.000                           | 1.972                                                | 0.000                           | 0.250                                                 | FAIL               | 3.827               | 11               |
| Lauric acid                              | 0.280               | 0.615                               | 4.662               | 2.005                           | 0.251               | 0.360                                | 0.819                           | 1.153                                                | 0.143                           | 0.107                                                 | FAIL               | 3.884               | 12               |
| Undecanoic Acid                          | 0.301               | 0.594                               | 4.476               | 2.191                           | 0.254               | 0.357                                | 0.802                           | 1.170                                                | 0.154                           | 0.096                                                 | FAIL               | 3.939               | 13               |
| 1,3-Distearoyl-2-elaidoylglycerol        | 0.197               | 0.698                               | 6.853               | 0.186                           | 0.132               | 0.479                                | 2.498                           | 0.526                                                | 0.095                           | 0.155                                                 | FAIL               | 3.981               | 14               |
| Decanoic acid                            | 0.314               | 0.581                               | 4.403               | 2.264                           | 0.264               | 0.347                                | 0.754                           | 1.218                                                | 0.167                           | 0.083                                                 | FAIL               | 4.031               | 15               |
| 2-(Oleoyloxy)propane-1,3-diyl distearate | 0.323               | 0.572                               | 6.894               | 0.227                           | 0.146               | 0.465                                | 0.395                           | 1.577                                                | 0.095                           | 0.155                                                 | FAIL               | 4.097               | 16               |
| 1,13-Tridecanediol                       | 0.268               | 0.627                               | 5.410               | 1.257                           | 0.265               | 0.346                                | 0.962                           | 1.010                                                | 0.133                           | 0.117                                                 | FAIL               | 4.117               | 17               |
| [1,1'-Biphenyl]-4,4'-diol                | 0.521               | 0.374                               | 3.433               | 3.234                           | 0.266               | 0.345                                | 0.000                           | 1.972                                                | 0.143                           | 0.107                                                 | FAIL               | 4.197               | 18               |
| Sebacic acid                             | 0.317               | 0.578                               | 4.353               | 2.314                           | 0.247               | 0.364                                | 0.000                           | 1.972                                                | 0.286                           | 0.036                                                 | FAIL               | 4.241               | 19               |
| Nonanoic acid                            | 0.350               | 0.545                               | 4.358               | 2.309                           | 0.286               | 0.325                                | 0.706                           | 1.266                                                | 0.182                           | 0.068                                                 | FAIL               | 4.256               | 20               |
| <b><i>Octano<sup>CSD</sup></i></b>       | <b><i>0.329</i></b> | <b><i>0.566</i></b>                 | <b><i>4.310</i></b> | <b><i>2.357</i></b>             | <b><i>0.306</i></b> | <b><i>0.305</i></b>                  | <b><i>2.217</i></b>             | <b><i>0.245</i></b>                                  | <b><i>0.111</i></b>             | <b><i>0.139</i></b>                                   | <b><i>FAIL</i></b> | <b><i>4.259</i></b> | <b><i>21</i></b> |
| 1,3-Distearoyl-2-oleoylglycerol          | 0.315               | 0.580                               | 7.105               | 0.438                           | 0.148               | 0.463                                | 1.469                           | 0.503                                                | 0.095                           | 0.155                                                 | FAIL               | 4.324               | 22               |
| 4,4'-Ethene-1,2-diylpyridine             | 0.562               | 0.333                               | 3.402               | 3.265                           | 0.273               | 0.338                                | 0.003                           | 1.969                                                | 0.143                           | 0.107                                                 | FAIL               | 4.346               | 23               |

|                                                             |              |              |              |              |              |              |              |              |              |              |             |              |           |
|-------------------------------------------------------------|--------------|--------------|--------------|--------------|--------------|--------------|--------------|--------------|--------------|--------------|-------------|--------------|-----------|
| (E)-4,4'-Diazastilbene                                      | 0.557        | 0.338        | 3.517        | 3.150        | 0.281        | 0.330        | 0.000        | 1.972        | 0.143        | 0.107        | FAIL        | 4.394        | 24        |
| Tetrathiafulvalene                                          | 0.625        | 0.270        | 3.635        | 3.032        | 0.346        | 0.265        | 0.000        | 1.972        | 0.000        | 0.250        | PASS        | 4.400        | 25        |
| 1,11-Undecanediol                                           | 0.316        | 0.579        | 5.358        | 1.309        | 0.301        | 0.310        | 0.928        | 1.044        | 0.154        | 0.096        | FAIL        | 4.453        | 26        |
| $\beta$ -8'- $\beta$ -Apocarotenal                          | 0.346        | 0.549        | 6.637        | 0.030        | 0.241        | 0.370        | 1.858        | 0.114        | 0.032        | 0.218        | FAIL        | 4.469        | 27        |
| Octanoic acid                                               | 0.374        | 0.521        | 4.479        | 2.188        | 0.319        | 0.292        | 0.735        | 1.237        | 0.200        | 0.050        | FAIL        | 4.557        | 28        |
| <b>Heptano<sup>CSD</sup></b>                                | <b>0.373</b> | <b>0.522</b> | <b>4.312</b> | <b>2.355</b> | <b>0.337</b> | <b>0.274</b> | <b>2.224</b> | <b>0.252</b> | <b>0.125</b> | <b>0.125</b> | <b>FAIL</b> | <b>4.563</b> | <b>29</b> |
| $\alpha$ -8'- $\beta$ -Apocarotenal                         | 0.323        | 0.572        | 7.126        | 0.459        | 0.258        | 0.353        | 1.710        | 0.262        | 0.032        | 0.218        | FAIL        | 4.583        | 30        |
| 2,2'-Bipyridine                                             | 0.585        | 0.310        | 3.419        | 3.248        | 0.297        | 0.314        | 0.000        | 1.972        | 0.167        | 0.083        | FAIL        | 4.594        | 31        |
| Hexan-1-amine                                               | 0.405        | 0.490        | 4.238        | 2.429        | 0.376        | 0.235        | 0.756        | 1.216        | 0.143        | 0.107        | FAIL        | 4.599        | 32        |
| 1,2-bis(4-Pyridyl)ethane                                    | 0.551        | 0.344        | 4.040        | 2.627        | 0.324        | 0.287        | 0.112        | 1.860        | 0.143        | 0.107        | FAIL        | 4.712        | 33        |
| Linoleic acid                                               | 0.503        | 0.392        | 5.502        | 1.165        | 0.256        | 0.355        | 0.704        | 1.268        | 0.100        | 0.150        | FAIL        | 4.716        | 34        |
| <b>Suberic acid</b>                                         | <b>0.370</b> | <b>0.525</b> | <b>4.370</b> | <b>2.297</b> | <b>0.290</b> | <b>0.321</b> | <b>0.000</b> | <b>1.972</b> | <b>0.333</b> | <b>0.083</b> | <b>FAIL</b> | <b>4.734</b> | <b>35</b> |
| Acridine                                                    | 0.643        | 0.252        | 3.510        | 3.157        | 0.304        | 0.307        | 1.354        | 0.618        | 0.071        | 0.179        | FAIL        | 4.736        | 36        |
| Phenazine                                                   | 0.648        | 0.247        | 3.459        | 3.208        | 0.304        | 0.307        | 0.027        | 1.945        | 0.143        | 0.107        | FAIL        | 4.758        | 37        |
| Heptanoic acid                                              | 0.419        | 0.476        | 4.305        | 2.362        | 0.337        | 0.274        | 0.746        | 1.226        | 0.222        | 0.028        | FAIL        | 4.791        | 38        |
| <b>1,2,4,5-Tetrafluoro-3,6-di-iodobenzene<sup>CSD</sup></b> | <b>0.704</b> | <b>0.191</b> | <b>3.961</b> | <b>2.706</b> | <b>0.363</b> | <b>0.248</b> | <b>0.000</b> | <b>1.972</b> | <b>0.000</b> | <b>0.250</b> | <b>PASS</b> | <b>4.817</b> | <b>39</b> |
| <b>Hexanol<sup>CSD</sup></b>                                | <b>0.400</b> | <b>0.495</b> | <b>4.308</b> | <b>2.359</b> | <b>0.373</b> | <b>0.238</b> | <b>2.216</b> | <b>0.244</b> | <b>0.143</b> | <b>0.107</b> | <b>FAIL</b> | <b>4.840</b> | <b>40</b> |
| Cinnamaldehyde                                              | 0.626        | 0.269        | 3.527        | 3.140        | 0.311        | 0.300        | 1.737        | 0.235        | 0.100        | 0.150        | FAIL        | 4.875        | 41        |
| 2,3,5,6-Tetrafluoro-7,7,8,8-tetracyanoquinodimethane        | 0.653        | 0.242        | 3.457        | 3.210        | 0.293        | 0.318        | 0.000        | 1.972        | 0.200        | 0.050        | FAIL        | 4.922        | 42        |
| 2,5-bis(4-Pyridyl)-1,3,4-oxadiazole                         | 0.539        | 0.356        | 3.575        | 3.092        | 0.263        | 0.348        | 0.744        | 1.228        | 0.294        | 0.044        | FAIL        | 4.927        | 43        |
| <b>Cinnamic acid</b>                                        | <b>0.620</b> | <b>0.275</b> | <b>3.514</b> | <b>3.153</b> | <b>0.310</b> | <b>0.301</b> | <b>0.687</b> | <b>1.285</b> | <b>0.182</b> | <b>0.068</b> | <b>FAIL</b> | <b>4.950</b> | <b>44</b> |
| 1,2-Dibenzylsulfane                                         | 0.445        | 0.450        | 6.000        | 0.667        | 0.400        | 0.211        | 1.445        | 0.527        | 0.000        | 0.250        | FAIL        | 4.991        | 45        |
| Benzalacetone                                               | 0.579        | 0.316        | 4.170        | 2.497        | 0.344        | 0.267        | 1.802        | 0.170        | 0.091        | 0.159        | FAIL        | 5.023        | 46        |
| Terephthalaldehyde                                          | 0.676        | 0.219        | 3.401        | 3.266        | 0.326        | 0.285        | 0.001        | 1.971        | 0.200        | 0.050        | FAIL        | 5.099        | 47        |
| 2,2'-(cyclohexa-2,5-diene-1,4-diylidene)dimalononitrile     | 0.655        | 0.240        | 3.418        | 3.249        | 0.299        | 0.312        | 0.000        | 1.972        | 0.250        | 0.000        | FAIL        | 5.109        | 48        |
| Pentan-1-amine                                              | 0.482        | 0.413        | 4.293        | 2.374        | 0.432        | 0.179        | 0.688        | 1.284        | 0.167        | 0.083        | FAIL        | 5.139        | 49        |
| Hexanoic acid                                               | 0.459        | 0.436        | 4.327        | 2.340        | 0.378        | 0.233        | 0.745        | 1.227        | 0.250        | 0.000        | FAIL        | 5.171        | 50        |
| <b>1,3-Diiodobenzene<sup>CSD</sup></b>                      | <b>0.741</b> | <b>0.154</b> | <b>3.960</b> | <b>2.707</b> | <b>0.397</b> | <b>0.214</b> | <b>0.884</b> | <b>1.088</b> | <b>0.000</b> | <b>0.250</b> | <b>PASS</b> | <b>5.209</b> | <b>51</b> |
| 1-Hydroxy-2-naphthoic acid                                  | 0.669        | 0.226        | 3.412        | 3.255        | 0.291        | 0.320        | 1.481        | 0.491        | 0.214        | 0.036        | FAIL        | 5.250        | 52        |
| Terephthalic acid                                           | 0.598        | 0.297        | 3.463        | 3.204        | 0.307        | 0.304        | 0.000        | 1.972        | 0.333        | 0.083        | FAIL        | 5.250        | 53        |
| 1,2-Dichloroethane                                          | 0.618        | 0.277        | 4.202        | 2.465        | 0.539        | 0.072        | 0.000        | 1.972        | 0.000        | 0.250        | PASS        | 5.254        | 54        |
| <b>Sorbic acid</b>                                          | <b>0.506</b> | <b>0.389</b> | <b>4.173</b> | <b>2.494</b> | <b>0.376</b> | <b>0.235</b> | <b>0.753</b> | <b>1.219</b> | <b>0.250</b> | <b>0.000</b> | <b>FAIL</b> | <b>5.269</b> | <b>55</b> |
| 1,4-Dimethoxybenzene                                        | 0.605        | 0.290        | 4.284        | 2.383        | 0.367        | 0.244        | 0.000        | 1.972        | 0.200        | 0.050        | PASS        | 5.293        | 56        |

|                                            |              |              |              |              |              |              |              |              |              |              |             |              |           |
|--------------------------------------------|--------------|--------------|--------------|--------------|--------------|--------------|--------------|--------------|--------------|--------------|-------------|--------------|-----------|
| 1,10-Phenanthroline                        | 0.692        | 0.203        | 3.494        | 3.173        | 0.304        | 0.307        | 2.372        | 0.400        | 0.143        | 0.107        | FAIL        | 5.305        | 57        |
| 1-Pentanol                                 | 0.486        | 0.409        | 4.191        | 2.476        | 0.425        | 0.186        | 2.278        | 0.306        | 0.167        | 0.083        | FAIL        | 5.362        | 58        |
| Vitamin A acetate                          | 0.461        | 0.434        | 7.045        | 0.378        | 0.370        | 0.241        | 0.484        | 1.488        | 0.083        | 0.167        | FAIL        | 5.377        | 59        |
| 1-(Naphthalen-2-yl)Ethan-1-One             | 0.684        | 0.211        | 4.171        | 2.496        | 0.362        | 0.249        | 1.811        | 0.161        | 0.077        | 0.173        | PASS        | 5.381        | 60        |
| 1,2-bis(Methylthio)ethane                  | 0.573        | 0.322        | 5.347        | 1.320        | 0.531        | 0.080        | 0.000        | 1.972        | 0.000        | 0.250        | FAIL        | 5.435        | 61        |
| 1,2-Ethanedithiol                          | 0.618        | 0.277        | 4.532        | 2.135        | 0.565        | 0.046        | 0.000        | 1.972        | 0.000        | 0.250        | PASS        | 5.451        | 62        |
| 4,4'-Bipyridine                            | 0.633        | 0.262        | 4.255        | 2.412        | 0.418        | 0.193        | 0.038        | 1.934        | 0.167        | 0.083        | PASS        | 5.454        | 63        |
| Chlorine                                   | 0.638        | 0.257        | 3.500        | 3.167        | 0.638        | 0.027        | 0.000        | 1.972        | 0.000        | 0.250        | PASS        | 5.462        | 64        |
| Benzophenone                               | 0.625        | 0.270        | 4.764        | 1.903        | 0.397        | 0.214        | 1.710        | 0.262        | 0.071        | 0.179        | PASS        | 5.464        | 65        |
| Piperine                                   | 0.501        | 0.394        | 5.747        | 0.920        | 0.340        | 0.271        | 1.216        | 0.756        | 0.190        | 0.060        | FAIL        | 5.483        | 66        |
| 2-Methoxynaphthalene                       | 0.688        | 0.207        | 4.175        | 2.492        | 0.362        | 0.249        | 2.226        | 0.254        | 0.083        | 0.167        | PASS        | 5.485        | 67        |
| Dimethyl succinate                         | 0.472        | 0.423        | 4.288        | 2.379        | 0.351        | 0.260        | 0.000        | 1.972        | 0.400        | 0.150        | FAIL        | 5.487        | 68        |
| <b>Adipic acid</b>                         | <b>0.447</b> | <b>0.448</b> | <b>4.512</b> | <b>2.155</b> | <b>0.363</b> | <b>0.248</b> | <b>0.000</b> | <b>1.972</b> | <b>0.400</b> | <b>0.150</b> | <b>FAIL</b> | <b>5.519</b> | <b>69</b> |
| Butan-1-amine                              | 0.525        | 0.370        | 4.174        | 2.493        | 0.480        | 0.131        | 0.800        | 1.172        | 0.200        | 0.050        | FAIL        | 5.546        | 70        |
| 2-Coumaric acid                            | 0.677        | 0.218        | 3.400        | 3.267        | 0.287        | 0.324        | 2.504        | 0.532        | 0.250        | 0.000        | FAIL        | 5.552        | 71        |
| <b>Benzoic acid<sup>CSD</sup></b>          | <b>0.718</b> | <b>0.177</b> | <b>3.423</b> | <b>3.244</b> | <b>0.366</b> | <b>0.245</b> | <b>0.598</b> | <b>1.374</b> | <b>0.222</b> | <b>0.028</b> | <b>FAIL</b> | <b>5.563</b> | <b>72</b> |
| Phenyl 2-Hydroxybenzoate                   | 0.564        | 0.331        | 4.907        | 1.760        | 0.358        | 0.253        | 1.858        | 0.114        | 0.188        | 0.062        | FAIL        | 5.593        | 73        |
| 4-Hydroxybenzaldehyde                      | 0.732        | 0.163        | 3.424        | 3.243        | 0.362        | 0.249        | 0.593        | 1.379        | 0.222        | 0.028        | FAIL        | 5.593        | 74        |
| <b>Toluene<sup>CSD</sup></b>               | <b>0.804</b> | <b>0.091</b> | <b>4.028</b> | <b>2.639</b> | <b>0.487</b> | <b>0.124</b> | <b>0.117</b> | <b>1.855</b> | <b>0.000</b> | <b>0.250</b> | <b>PASS</b> | <b>5.631</b> | <b>75</b> |
| 1,2,4,5-Tetracyanobenzene                  | 0.730        | 0.165        | 3.431        | 3.236        | 0.340        | 0.271        | 0.153        | 1.819        | 0.286        | 0.036        | FAIL        | 5.652        | 76        |
| 1-Naphthol                                 | 0.821        | 0.074        | 3.411        | 3.256        | 0.357        | 0.254        | 2.068        | 0.096        | 0.091        | 0.159        | FAIL        | 5.660        | 77        |
| Ethyl Propionate                           | 0.552        | 0.343        | 4.265        | 2.402        | 0.423        | 0.188        | 0.313        | 1.659        | 0.286        | 0.036        | FAIL        | 5.665        | 78        |
| 1,4-Phenylenediamine                       | 0.741        | 0.154        | 3.420        | 3.247        | 0.379        | 0.232        | 0.000        | 1.972        | 0.250        | 0.000        | FAIL        | 5.678        | 79        |
| <b>Cinnamide</b>                           | <b>0.567</b> | <b>0.328</b> | <b>4.805</b> | <b>1.862</b> | <b>0.403</b> | <b>0.208</b> | <b>1.692</b> | <b>0.280</b> | <b>0.182</b> | <b>0.068</b> | <b>FAIL</b> | <b>5.686</b> | <b>80</b> |
| <b>4-Aminobenzoic acid</b>                 | <b>0.663</b> | <b>0.232</b> | <b>3.535</b> | <b>3.132</b> | <b>0.352</b> | <b>0.259</b> | <b>0.999</b> | <b>0.973</b> | <b>0.300</b> | <b>0.050</b> | <b>PASS</b> | <b>5.702</b> | <b>81</b> |
| Dibenzoyl peroxide                         | 0.415        | 0.480        | 6.320        | 0.347        | 0.406        | 0.205        | 1.245        | 0.727        | 0.222        | 0.028        | FAIL        | 5.736        | 82        |
| <b>n-Butanol<sup>CSD</sup></b>             | <b>0.514</b> | <b>0.381</b> | <b>4.272</b> | <b>2.395</b> | <b>0.475</b> | <b>0.136</b> | <b>2.216</b> | <b>0.244</b> | <b>0.200</b> | <b>0.050</b> | <b>FAIL</b> | <b>5.761</b> | <b>83</b> |
| Allocinnamic acid                          | 0.666        | 0.229        | 4.485        | 2.182        | 0.415        | 0.196        | 0.670        | 1.302        | 0.182        | 0.068        | PASS        | 5.778        | 84        |
| <b>4-Hydroxybenzoic acid<sup>CSD</sup></b> | <b>0.672</b> | <b>0.223</b> | <b>3.470</b> | <b>3.197</b> | <b>0.349</b> | <b>0.262</b> | <b>1.563</b> | <b>0.409</b> | <b>0.300</b> | <b>0.050</b> | <b>PASS</b> | <b>5.795</b> | <b>85</b> |
| 4-Methoxybenzoic acid                      | 0.606        | 0.289        | 4.207        | 2.460        | 0.371        | 0.240        | 1.587        | 0.385        | 0.273        | 0.023        | PASS        | 5.802        | 86        |
| Acetophenone                               | 0.699        | 0.196        | 4.167        | 2.500        | 0.433        | 0.178        | 1.823        | 0.149        | 0.111        | 0.139        | PASS        | 5.804        | 87        |
| 1-(4-Methoxyphenyl)ethan-1-one             | 0.588        | 0.307        | 4.299        | 2.368        | 0.368        | 0.243        | 3.681        | 1.709        | 0.182        | 0.068        | PASS        | 5.805        | 88        |
| Phenoxyacetic acid                         | 0.601        | 0.294        | 4.159        | 2.508        | 0.355        | 0.256        | 2.264        | 0.292        | 0.273        | 0.023        | PASS        | 5.827        | 89        |
| <b>Hydroquinone</b>                        | <b>0.772</b> | <b>0.123</b> | <b>3.426</b> | <b>3.241</b> | <b>0.394</b> | <b>0.217</b> | <b>0.000</b> | <b>1.972</b> | <b>0.250</b> | <b>0.000</b> | <b>FAIL</b> | <b>5.834</b> | <b>90</b> |



|                                                  |              |              |              |              |              |              |              |              |              |              |             |              |            |
|--------------------------------------------------|--------------|--------------|--------------|--------------|--------------|--------------|--------------|--------------|--------------|--------------|-------------|--------------|------------|
| Ibuprofen                                        | 0.530        | 0.365        | 5.925        | 0.742        | 0.467        | 0.144        | 0.872        | 1.100        | 0.133        | 0.117        | FAIL        | 5.841        | 91         |
| Myricetin                                        | 0.684        | 0.211        | 3.526        | 3.141        | 0.246        | 0.365        | 2.849        | 0.877        | 0.348        | 0.098        | FAIL        | 5.856        | 92         |
| <b>Glutaric acid<sup>CSD</sup></b>               | <b>0.465</b> | <b>0.430</b> | <b>4.496</b> | <b>2.171</b> | <b>0.400</b> | <b>0.211</b> | <b>0.115</b> | <b>1.857</b> | <b>0.444</b> | <b>0.194</b> | <b>FAIL</b> | <b>5.876</b> | <b>93</b>  |
| Pterostilbene                                    | 0.770        | 0.125        | 4.164        | 2.503        | 0.287        | 0.324        | 3.149        | 1.177        | 0.158        | 0.092        | FAIL        | 5.884        | 94         |
| Dimethylsulfide                                  | 0.689        | 0.206        | 4.183        | 2.484        | 0.600        | 0.011        | 1.168        | 0.804        | 0.000        | 0.250        | PASS        | 5.896        | 95         |
| 4-Acetamidobenzoic acid                          | 0.552        | 0.343        | 4.478        | 2.189        | 0.359        | 0.252        | 2.309        | 0.337        | 0.308        | 0.058        | FAIL        | 5.909        | 96         |
| 4-Methoxybenzaldehyde                            | 0.635        | 0.260        | 4.172        | 2.495        | 0.377        | 0.234        | 3.390        | 1.418        | 0.200        | 0.050        | PASS        | 5.962        | 97         |
| Methyl paraben                                   | 0.627        | 0.268        | 4.175        | 2.492        | 0.381        | 0.230        | 2.055        | 0.083        | 0.273        | 0.023        | PASS        | 5.975        | 98         |
| 4-Ethoxyphenol                                   | 0.620        | 0.275        | 4.284        | 2.383        | 0.382        | 0.229        | 3.447        | 1.475        | 0.200        | 0.050        | PASS        | 5.976        | 99         |
| 1,3-Propanedithiol                               | 0.629        | 0.266        | 5.245        | 1.422        | 0.611        | 0.000        | 0.620        | 1.352        | 0.000        | 0.250        | PASS        | 5.979        | 100        |
| 1,2-Diphenyldisulfane                            | 0.577        | 0.318        | 6.499        | 0.168        | 0.527        | 0.084        | 1.224        | 0.748        | 0.000        | 0.250        | FAIL        | 5.996        | 101        |
| Methyl benzoate                                  | 0.646        | 0.249        | 4.786        | 1.881        | 0.462        | 0.149        | 0.486        | 1.486        | 0.200        | 0.050        | PASS        | 6.008        | 102        |
| 4-Nitrobenzoic acid                              | 0.636        | 0.259        | 3.538        | 3.129        | 0.335        | 0.276        | 1.422        | 0.550        | 0.417        | 0.167        | FAIL        | 6.023        | 103        |
| 4-Benzoquinone                                   | 0.819        | 0.076        | 3.415        | 3.252        | 0.409        | 0.202        | 0.000        | 1.972        | 0.250        | 0.000        | FAIL        | 6.037        | 104        |
| 1,2-Dicyclopropylethane-1,2-dione                | 0.620        | 0.275        | 4.972        | 1.695        | 0.503        | 0.108        | 0.000        | 1.972        | 0.200        | 0.050        | PASS        | 6.049        | 105        |
| Coumarin                                         | 0.788        | 0.107        | 3.423        | 3.244        | 0.348        | 0.263        | 3.466        | 1.494        | 0.182        | 0.068        | FAIL        | 6.070        | 106        |
| 4-Aminobenzamide                                 | 0.661        | 0.234        | 4.014        | 2.653        | 0.400        | 0.211        | 1.353        | 0.619        | 0.300        | 0.050        | PASS        | 6.078        | 107        |
| cis-anti-cis-Dicyclohexano-18-crown-6            | 0.619        | 0.276        | 6.235        | 0.432        | 0.378        | 0.233        | 0.000        | 1.972        | 0.231        | 0.019        | PASS        | 6.087        | 108        |
| Pyromellitic                                     | 0.766        | 0.129        | 3.447        | 3.220        | 0.352        | 0.259        | 0.000        | 1.972        | 0.375        | 0.125        | PASS        | 6.094        | 109        |
| 4'-Hydroxyacetophenone                           | 0.661        | 0.234        | 4.142        | 2.525        | 0.405        | 0.206        | 3.138        | 1.166        | 0.200        | 0.050        | PASS        | 6.096        | 110        |
| 2-Methoxy-4-(1-(E)-propenyl)phenyl acetate       | 0.629        | 0.266        | 5.226        | 1.441        | 0.378        | 0.233        | 2.404        | 0.432        | 0.200        | 0.050        | PASS        | 6.107        | 111        |
| <b>Nicotinic acid</b>                            | <b>0.723</b> | <b>0.172</b> | <b>3.463</b> | <b>3.204</b> | <b>0.373</b> | <b>0.238</b> | <b>1.357</b> | <b>0.615</b> | <b>0.333</b> | <b>0.083</b> | <b>PASS</b> | <b>6.122</b> | <b>112</b> |
| <b>Nicotinamide</b>                              | <b>0.709</b> | <b>0.186</b> | <b>3.726</b> | <b>2.941</b> | <b>0.397</b> | <b>0.214</b> | <b>0.666</b> | <b>1.306</b> | <b>0.333</b> | <b>0.083</b> | <b>PASS</b> | <b>6.129</b> | <b>113</b> |
| 2,4-Dihydroxybenzoic acid                        | 0.735        | 0.160        | 3.401        | 3.266        | 0.344        | 0.267        | 1.390        | 0.582        | 0.364        | 0.114        | FAIL        | 6.147        | 114        |
| <b>Dichloromethane<sup>CSD</sup></b>             | <b>0.720</b> | <b>0.175</b> | <b>4.098</b> | <b>2.569</b> | <b>0.638</b> | <b>0.027</b> | <b>1.443</b> | <b>0.529</b> | <b>0.000</b> | <b>0.250</b> | <b>PASS</b> | <b>6.154</b> | <b>115</b> |
| 1,3-Di(pyridin-4-yl)propane                      | 0.539        | 0.356        | 6.130        | 0.537        | 0.489        | 0.122        | 1.734        | 0.238        | 0.133        | 0.117        | FAIL        | 6.159        | 116        |
| <b>Benzamide</b>                                 | <b>0.714</b> | <b>0.181</b> | <b>4.073</b> | <b>2.594</b> | <b>0.436</b> | <b>0.175</b> | <b>1.562</b> | <b>0.410</b> | <b>0.222</b> | <b>0.028</b> | <b>PASS</b> | <b>6.168</b> | <b>117</b> |
| 2,3,5,6-Tetrachlorocyclohexa-2,5-diene-1,4-dione | 0.938        | 0.043        | 3.595        | 3.072        | 0.403        | 0.208        | 0.000        | 1.972        | 0.167        | 0.083        | PASS        | 6.172        | 118        |
| 2,5-Dimethylpyrazine                             | 0.730        | 0.165        | 4.193        | 2.474        | 0.461        | 0.150        | 0.000        | 1.972        | 0.250        | 0.000        | PASS        | 6.180        | 119        |
| Phenol                                           | 0.846        | 0.049        | 3.410        | 3.257        | 0.429        | 0.182        | 2.254        | 0.282        | 0.143        | 0.107        | FAIL        | 6.211        | 120        |
| <b>Salicylic acid<sup>CSD</sup></b>              | <b>0.788</b> | <b>0.107</b> | <b>3.414</b> | <b>3.253</b> | <b>0.367</b> | <b>0.244</b> | <b>1.572</b> | <b>0.400</b> | <b>0.300</b> | <b>0.050</b> | <b>FAIL</b> | <b>6.219</b> | <b>121</b> |
| (E)-4-(4-Hydroxy-3-methoxyphenyl)but-3-en-2-one  | 0.700        | 0.195        | 4.146        | 2.521        | 0.343        | 0.268        | 4.247        | 2.275        | 0.214        | 0.036        | PASS        | 6.232        | 122        |
| <b>Fumaric acid</b>                              | <b>0.630</b> | <b>0.265</b> | <b>3.423</b> | <b>3.244</b> | <b>0.396</b> | <b>0.215</b> | <b>0.000</b> | <b>1.972</b> | <b>0.500</b> | <b>0.250</b> | <b>FAIL</b> | <b>6.233</b> | <b>123</b> |

|                                                              |              |              |              |              |              |              |              |              |              |              |             |              |            |
|--------------------------------------------------------------|--------------|--------------|--------------|--------------|--------------|--------------|--------------|--------------|--------------|--------------|-------------|--------------|------------|
| <b>Ethyl acetate<sup>CSD</sup></b>                           | <b>0.634</b> | <b>0.261</b> | <b>4.251</b> | <b>2.416</b> | <b>0.475</b> | <b>0.136</b> | <b>0.275</b> | <b>1.697</b> | <b>0.333</b> | <b>0.083</b> | <b>PASS</b> | <b>6.267</b> | <b>124</b> |
| Phenyl acetate                                               | 0.653        | 0.242        | 5.263        | 1.404        | 0.499        | 0.112        | 0.310        | 1.662        | 0.200        | 0.050        | PASS        | 6.283        | 125        |
| 4-(4-Hydroxyphenyl)butan-2-one                               | 0.535        | 0.360        | 6.041        | 0.626        | 0.485        | 0.126        | 2.203        | 0.231        | 0.167        | 0.083        | FAIL        | 6.299        | 126        |
| Tetraiodoethene                                              | 0.988        | 0.093        | 3.960        | 2.707        | 0.519        | 0.092        | 0.000        | 1.972        | 0.000        | 0.250        | PASS        | 6.300        | 127        |
| <b>3-Hydroxybenzoic acid<sup>CSD</sup></b>                   | <b>0.815</b> | <b>0.080</b> | <b>3.470</b> | <b>3.197</b> | <b>0.373</b> | <b>0.238</b> | <b>1.428</b> | <b>0.544</b> | <b>0.300</b> | <b>0.050</b> | <b>PASS</b> | <b>6.321</b> | <b>128</b> |
| Anthranilic acid                                             | 0.851        | 0.044        | 3.460        | 3.207        | 0.373        | 0.238        | 0.759        | 1.213        | 0.300        | 0.050        | PASS        | 6.321        | 129        |
| Acrylaldehyde                                                | 0.746        | 0.149        | 3.404        | 3.263        | 0.476        | 0.135        | 1.749        | 0.223        | 0.250        | 0.000        | FAIL        | 6.336        | 130        |
| <b>Isonicotinamide</b>                                       | <b>0.702</b> | <b>0.193</b> | <b>4.020</b> | <b>2.647</b> | <b>0.428</b> | <b>0.183</b> | <b>0.856</b> | <b>1.116</b> | <b>0.333</b> | <b>0.083</b> | <b>PASS</b> | <b>6.342</b> | <b>131</b> |
| bis(Methylthio)methane                                       | 0.678        | 0.217        | 5.414        | 1.253        | 0.674        | 0.063        | 0.183        | 1.789        | 0.000        | 0.250        | PASS        | 6.345        | 132        |
| 4-Nitrophenol                                                | 0.726        | 0.169        | 3.444        | 3.223        | 0.371        | 0.240        | 1.397        | 0.575        | 0.400        | 0.150        | PASS        | 6.353        | 133        |
| Chloranilic acid                                             | 0.880        | 0.015        | 3.500        | 3.167        | 0.357        | 0.254        | 0.000        | 1.972        | 0.333        | 0.083        | PASS        | 6.353        | 134        |
| 2,6-Dimethylpyrazine                                         | 0.761        | 0.134        | 4.185        | 2.482        | 0.476        | 0.135        | 0.189        | 1.783        | 0.250        | 0.000        | PASS        | 6.364        | 135        |
| <b>Gentisic acid<sup>CSD</sup></b>                           | <b>0.810</b> | <b>0.085</b> | <b>3.446</b> | <b>3.221</b> | <b>0.365</b> | <b>0.246</b> | <b>0.737</b> | <b>1.235</b> | <b>0.364</b> | <b>0.114</b> | <b>PASS</b> | <b>6.369</b> | <b>136</b> |
| iso-Deoxycholic acid                                         | 0.459        | 0.436        | 7.972        | 1.305        | 0.429        | 0.182        | 2.229        | 0.257        | 0.143        | 0.107        | FAIL        | 6.370        | 137        |
| <b>Ferulic acid</b>                                          | <b>0.714</b> | <b>0.181</b> | <b>4.207</b> | <b>2.460</b> | <b>0.341</b> | <b>0.270</b> | <b>3.307</b> | <b>1.335</b> | <b>0.286</b> | <b>0.036</b> | <b>PASS</b> | <b>6.375</b> | <b>138</b> |
| (1S,6R,10R)-(+)-6-Methyl-4-oxabicyclo(8.4.1)pentadecan-3-one | 0.684        | 0.211        | 6.187        | 0.480        | 0.498        | 0.113        | 0.266        | 1.706        | 0.118        | 0.132        | PASS        | 6.379        | 139        |
| 2,5-Dimethylphenol                                           | 0.811        | 0.084        | 4.415        | 2.252        | 0.467        | 0.144        | 1.987        | 0.015        | 0.111        | 0.139        | PASS        | 6.393        | 140        |
| 3,3'-Thiodipropionic acid                                    | 0.556        | 0.339        | 5.322        | 1.345        | 0.442        | 0.169        | 0.697        | 1.275        | 0.364        | 0.114        | FAIL        | 6.404        | 141        |
| 1,2-Dimethyldisulfane                                        | 0.669        | 0.226        | 5.287        | 1.380        | 0.652        | 0.041        | 1.458        | 0.514        | 0.000        | 0.250        | PASS        | 6.411        | 142        |
| Crotonic acid                                                | 0.640        | 0.255        | 4.263        | 2.404        | 0.495        | 0.116        | 0.628        | 1.344        | 0.333        | 0.083        | PASS        | 6.423        | 143        |
| 2,4-Pyridinedicarboxylic acid                                | 0.784        | 0.111        | 3.401        | 3.266        | 0.334        | 0.277        | 1.299        | 0.673        | 0.417        | 0.167        | FAIL        | 6.434        | 144        |
| 2,4-Dimethylpyridine                                         | 0.841        | 0.054        | 4.200        | 2.467        | 0.484        | 0.127        | 1.413        | 0.559        | 0.125        | 0.125        | PASS        | 6.436        | 145        |
| n-Butyl acetate                                              | 0.619        | 0.276        | 5.331        | 1.336        | 0.518        | 0.093        | 0.333        | 1.639        | 0.250        | 0.000        | PASS        | 6.437        | 146        |
| Propan-1-amine                                               | 0.640        | 0.255        | 4.239        | 2.428        | 0.574        | 0.037        | 0.754        | 1.218        | 0.250        | 0.000        | PASS        | 6.441        | 147        |
| 3,4-(Methylenedioxy)benzaldehyde                             | 0.725        | 0.170        | 4.167        | 2.500        | 0.426        | 0.185        | 2.044        | 0.072        | 0.273        | 0.023        | PASS        | 6.451        | 148        |
| L-Lysine                                                     | 0.525        | 0.370        | 5.336        | 1.331        | 0.442        | 0.169        | 0.860        | 1.112        | 0.400        | 0.150        | FAIL        | 6.458        | 149        |
| 1,3-Diphenylpropan-2-one                                     | 0.593        | 0.302        | 6.685        | 0.018        | 0.538        | 0.073        | 1.889        | 0.083        | 0.063        | 0.187        | PASS        | 6.471        | 150        |
| 2-Amino-5-methylbenzoic acid                                 | 0.835        | 0.060        | 3.956        | 2.711        | 0.413        | 0.198        | 0.751        | 1.221        | 0.273        | 0.023        | PASS        | 6.475        | 151        |
| Levulinic acid                                               | 0.567        | 0.328        | 4.500        | 2.167        | 0.443        | 0.168        | 2.191        | 0.219        | 0.375        | 0.125        | FAIL        | 6.477        | 152        |
| 2,6-Dimethylpyridine                                         | 0.828        | 0.067        | 4.460        | 2.207        | 0.504        | 0.107        | 1.150        | 0.822        | 0.125        | 0.125        | PASS        | 6.503        | 153        |
| Phenylmethanethiol                                           | 0.754        | 0.141        | 5.586        | 1.081        | 0.601        | 0.010        | 0.933        | 1.039        | 0.000        | 0.250        | PASS        | 6.504        | 154        |
| Lidocaine                                                    | 0.644        | 0.251        | 6.024        | 0.643        | 0.430        | 0.181        | 2.528        | 0.556        | 0.176        | 0.074        | PASS        | 6.530        | 155        |
| D-Lysine                                                     | 0.528        | 0.367        | 5.342        | 1.325        | 0.443        | 0.168        | 1.251        | 0.721        | 0.400        | 0.150        | FAIL        | 6.539        | 156        |

|                                                                |              |              |              |              |              |              |              |              |              |              |      |              |            |
|----------------------------------------------------------------|--------------|--------------|--------------|--------------|--------------|--------------|--------------|--------------|--------------|--------------|------|--------------|------------|
| 4-Methylbenzenesulfonic acid                                   | 0.645        | 0.250        | 5.127        | 1.540        | 0.494        | 0.117        | 0.929        | 1.043        | 0.273        | 0.023        | PASS | 6.549        | 157        |
| <b>Maleic Acid<sup>CS</sup></b>                                | <b>0.696</b> | <b>0.199</b> | <b>3.400</b> | <b>3.267</b> | <b>0.373</b> | <b>0.238</b> | <b>1.168</b> | <b>0.804</b> | <b>0.500</b> | <b>0.250</b> | FAIL | <b>6.551</b> | <b>158</b> |
| Salicylaldehyde                                                | 0.834        | 0.061        | 3.412        | 3.255        | 0.391        | 0.220        | 3.746        | 1.774        | 0.222        | 0.028        | FAIL | 6.554        | 159        |
| <b>Succinamide</b>                                             | <b>0.597</b> | <b>0.298</b> | <b>4.402</b> | <b>2.265</b> | <b>0.433</b> | <b>0.178</b> | <b>0.000</b> | <b>1.972</b> | <b>0.500</b> | <b>0.250</b> | PASS | <b>6.564</b> | <b>160</b> |
| 3-Methylbut-2-enoic acid                                       | 0.727        | 0.168        | 4.261        | 2.406        | 0.495        | 0.116        | 0.893        | 1.079        | 0.286        | 0.036        | PASS | 6.587        | 161        |
| 4-Allyl-2-methoxyphenyl benzoate                               | 0.562        | 0.333        | 7.226        | 0.559        | 0.444        | 0.167        | 2.536        | 0.564        | 0.150        | 0.100        | FAIL | 6.602        | 162        |
| Quinoxaline-N,N'-dioxide                                       | 0.920        | 0.025        | 3.503        | 3.164        | 0.383        | 0.228        | 0.151        | 1.821        | 0.333        | 0.083        | PASS | 6.603        | 163        |
| Trimesic acid                                                  | 0.907        | 0.012        | 3.404        | 3.263        | 0.310        | 0.301        | 0.868        | 1.104        | 0.400        | 0.150        | FAIL | 6.614        | 164        |
| 2-Phenylacetic acid                                            | 0.646        | 0.249        | 5.672        | 0.995        | 0.548        | 0.063        | 0.613        | 1.359        | 0.200        | 0.050        | PASS | 6.616        | 165        |
| Ethyl(methyl)sulfane                                           | 0.725        | 0.170        | 5.219        | 1.448        | 0.683        | 0.072        | 1.179        | 0.793        | 0.000        | 0.250        | PASS | 6.637        | 166        |
| 1,1,6,6-Tetraphenylhexa-2,4-diyne-1,6-diol                     | 0.698        | 0.197        | 7.723        | 1.056        | 0.479        | 0.132        | 0.274        | 1.698        | 0.063        | 0.187        | PASS | 6.645        | 167        |
| Indomethacin                                                   | 0.650        | 0.245        | 6.973        | 0.306        | 0.418        | 0.193        | 1.187        | 0.785        | 0.200        | 0.050        | PASS | 6.656        | 168        |
| Tetramethylpyrazine                                            | 0.857        | 0.038        | 4.426        | 2.241        | 0.507        | 0.104        | 0.000        | 1.972        | 0.200        | 0.050        | PASS | 6.659        | 169        |
| 2-Acetylpyrrole                                                | 0.758        | 0.137        | 4.160        | 2.507        | 0.475        | 0.136        | 2.154        | 0.182        | 0.250        | 0.000        | PASS | 6.673        | 170        |
| <b>Hippuric acid</b>                                           | <b>0.564</b> | <b>0.331</b> | <b>5.850</b> | <b>0.817</b> | <b>0.465</b> | <b>0.146</b> | <b>1.862</b> | <b>0.110</b> | <b>0.308</b> | <b>0.058</b> | FAIL | <b>6.682</b> | <b>171</b> |
| 2-Pyridone                                                     | 0.847        | 0.048        | 3.448        | 3.219        | 0.437        | 0.174        | 1.908        | 0.064        | 0.286        | 0.036        | PASS | 6.683        | 172        |
| <b>Resorcinol</b>                                              | <b>0.844</b> | <b>0.051</b> | <b>3.410</b> | <b>3.257</b> | <b>0.391</b> | <b>0.220</b> | <b>3.867</b> | <b>1.895</b> | <b>0.250</b> | <b>0.000</b> | FAIL | <b>6.701</b> | <b>173</b> |
| 1,4-Dimethylpiperazine                                         | 0.728        | 0.167        | 4.933        | 1.734        | 0.547        | 0.064        | 0.000        | 1.972        | 0.250        | 0.000        | PASS | 6.715        | 174        |
| 4-(Hydroxymethyl)phenol                                        | 0.679        | 0.216        | 4.762        | 1.905        | 0.473        | 0.138        | 3.531        | 1.559        | 0.222        | 0.028        | PASS | 6.734        | 175        |
| 2,6-Pyridinedicarboxylic acid                                  | 0.809        | 0.086        | 3.404        | 3.263        | 0.338        | 0.273        | 2.614        | 0.642        | 0.417        | 0.167        | FAIL | 6.751        | 176        |
| Furfural                                                       | 0.782        | 0.113        | 3.400        | 3.267        | 0.414        | 0.197        | 4.208        | 2.236        | 0.286        | 0.036        | FAIL | 6.762        | 177        |
| $\alpha$ -Ketoglutaric acid                                    | 0.568        | 0.327        | 4.557        | 2.110        | 0.412        | 0.199        | 1.994        | 0.022        | 0.500        | 0.250        | FAIL | 6.778        | 178        |
| 3 $\beta$ ,12 $\beta$ -Dihydroxy-5 $\beta$ -cholan-24-oic acid | 0.478        | 0.417        | 8.375        | 1.708        | 0.457        | 0.154        | 3.080        | 1.108        | 0.143        | 0.107        | FAIL | 6.802        | 179        |
| Diphenyl ether                                                 | 0.633        | 0.262        | 6.652        | 0.015        | 0.575        | 0.036        | 2.169        | 0.197        | 0.077        | 0.173        | PASS | 6.819        | 180        |
| 2,3-Butanedione                                                | 0.740        | 0.155        | 4.312        | 2.355        | 0.550        | 0.061        | 0.000        | 1.972        | 0.333        | 0.083        | PASS | 6.855        | 181        |
| Pyrrole                                                        | 0.984        | 0.089        | 3.417        | 3.250        | 0.529        | 0.082        | 0.189        | 1.783        | 0.200        | 0.050        | FAIL | 6.868        | 182        |
| Nootkatone                                                     | 0.731        | 0.164        | 6.467        | 0.200        | 0.543        | 0.068        | 2.011        | 0.039        | 0.063        | 0.187        | PASS | 6.888        | 183        |
| Pyridine                                                       | 0.990        | 0.095        | 3.400        | 3.267        | 0.509        | 0.102        | 1.341        | 0.631        | 0.167        | 0.083        | FAIL | 6.891        | 184        |
| 2,4,6-Trimethylphenol                                          | 0.990        | 0.095        | 4.256        | 2.411        | 0.468        | 0.143        | 2.014        | 0.042        | 0.100        | 0.150        | PASS | 6.892        | 185        |
| Cyclohexane-1,4-diamine                                        | 0.735        | 0.160        | 5.150        | 1.517        | 0.571        | 0.040        | 0.028        | 1.944        | 0.250        | 0.000        | PASS | 6.897        | 186        |
| 1-Chloro-1,1,2,2,2-pentafluoroethane                           | 0.765        | 0.130        | 5.106        | 1.561        | 0.745        | 0.134        | 0.852        | 1.120        | 0.000        | 0.250        | PASS | 6.901        | 187        |
| <b>Phloroglucinol</b>                                          | <b>0.966</b> | <b>0.071</b> | <b>3.414</b> | <b>3.253</b> | <b>0.412</b> | <b>0.199</b> | <b>0.596</b> | <b>1.376</b> | <b>0.333</b> | <b>0.083</b> | FAIL | <b>6.904</b> | <b>188</b> |
| 1,4,8,11-Tetra-azacyclotetradecane                             | 0.845        | 0.050        | 5.126        | 1.541        | 0.454        | 0.157        | 0.000        | 1.972        | 0.286        | 0.036        | PASS | 6.937        | 189        |
| 1,1'-Azo-bis(carbamide)                                        | 0.631        | 0.264        | 3.438        | 3.229        | 0.355        | 0.256        | 0.000        | 1.972        | 0.750        | 0.500        | FAIL | 6.942        | 190        |

|                                                      |              |              |              |              |              |              |              |              |              |              |             |              |            |
|------------------------------------------------------|--------------|--------------|--------------|--------------|--------------|--------------|--------------|--------------|--------------|--------------|-------------|--------------|------------|
| Pyrazine-1,4-dioxide                                 | 0.818        | 0.077        | 3.401        | 3.266        | 0.420        | 0.191        | 0.188        | 1.784        | 0.500        | 0.250        | FAIL        | 6.951        | 191        |
| L-Carvone                                            | 0.666        | 0.229        | 6.459        | 0.208        | 0.609        | 0.002        | 1.876        | 0.096        | 0.091        | 0.159        | PASS        | 6.988        | 192        |
| L-Cystine                                            | 0.561        | 0.334        | 6.114        | 0.553        | 0.476        | 0.135        | 0.567        | 1.405        | 0.429        | 0.179        | FAIL        | 6.988        | 193        |
| (R,S)-Hesperetin                                     | 0.565        | 0.330        | 6.819        | 0.152        | 0.441        | 0.170        | 3.272        | 1.300        | 0.273        | 0.023        | FAIL        | 7.017        | 194        |
| Pyrazine                                             | 0.907        | 0.012        | 3.413        | 3.254        | 0.525        | 0.086        | 0.000        | 1.972        | 0.333        | 0.083        | FAIL        | 7.024        | 195        |
| o-Cresol                                             | 0.942        | 0.047        | 4.170        | 2.497        | 0.534        | 0.077        | 2.025        | 0.053        | 0.125        | 0.125        | PASS        | 7.038        | 196        |
| <b>Catechol</b>                                      | <b>0.937</b> | <b>0.042</b> | <b>3.428</b> | <b>3.239</b> | <b>0.437</b> | <b>0.174</b> | <b>3.112</b> | <b>1.140</b> | <b>0.250</b> | <b>0.000</b> | <b>FAIL</b> | <b>7.047</b> | <b>197</b> |
| 2-Aminopyrimidine                                    | 0.835        | 0.060        | 3.440        | 3.227        | 0.429        | 0.182        | 1.630        | 0.342        | 0.429        | 0.179        | PASS        | 7.052        | 198        |
| Galactitol                                           | 0.510        | 0.385        | 5.855        | 0.812        | 0.485        | 0.126        | 0.857        | 1.115        | 0.500        | 0.250        | FAIL        | 7.066        | 199        |
| Phthalide                                            | 0.842        | 0.053        | 4.172        | 2.495        | 0.483        | 0.128        | 3.721        | 1.749        | 0.200        | 0.050        | PASS        | 7.071        | 200        |
| <b>Naphthalene-1,5-disulfonic acid<sup>CSD</sup></b> | <b>0.776</b> | <b>0.119</b> | <b>5.519</b> | <b>1.148</b> | <b>0.447</b> | <b>0.164</b> | <b>0.701</b> | <b>1.271</b> | <b>0.333</b> | <b>0.083</b> | <b>PASS</b> | <b>7.088</b> | <b>201</b> |
| DL-Arginine                                          | 0.501        | 0.394        | 5.879        | 0.788        | 0.470        | 0.141        | 1.457        | 0.515        | 0.500        | 0.250        | FAIL        | 7.091        | 202        |
| <b>L-Arginine</b>                                    | <b>0.501</b> | <b>0.394</b> | <b>5.879</b> | <b>0.788</b> | <b>0.470</b> | <b>0.141</b> | <b>1.457</b> | <b>0.515</b> | <b>0.500</b> | <b>0.250</b> | <b>FAIL</b> | <b>7.091</b> | <b>203</b> |
| Tetracyanoethylene                                   | 0.942        | 0.047        | 3.405        | 3.262        | 0.451        | 0.160        | 0.000        | 1.972        | 0.400        | 0.150        | FAIL        | 7.093        | 204        |
| Butyramide                                           | 0.646        | 0.249        | 5.020        | 1.647        | 0.558        | 0.053        | 1.783        | 0.189        | 0.333        | 0.083        | PASS        | 7.100        | 205        |
| Allitol                                              | 0.585        | 0.310        | 5.562        | 1.105        | 0.493        | 0.118        | 0.000        | 1.972        | 0.500        | 0.250        | PASS        | 7.102        | 206        |
| Dichlorodifluoromethane                              | 0.796        | 0.099        | 4.986        | 1.681        | 0.779        | 0.168        | 1.010        | 0.962        | 0.000        | 0.250        | PASS        | 7.114        | 207        |
| Pyrimethamine                                        | 0.733        | 0.162        | 6.666        | 0.001        | 0.494        | 0.117        | 0.637        | 1.335        | 0.235        | 0.015        | PASS        | 7.131        | 208        |
| Cyclamic acid                                        | 0.642        | 0.253        | 5.673        | 0.994        | 0.549        | 0.062        | 0.563        | 1.409        | 0.364        | 0.114        | PASS        | 7.157        | 209        |
| Phenylmethanol                                       | 0.808        | 0.087        | 5.193        | 1.474        | 0.598        | 0.013        | 2.134        | 0.162        | 0.125        | 0.125        | PASS        | 7.173        | 210        |
| Methyl cubane-1-carboxylate                          | 0.709        | 0.186        | 6.397        | 0.270        | 0.629        | 0.018        | 0.334        | 1.638        | 0.167        | 0.083        | PASS        | 7.179        | 211        |
| <b>Orotic acid</b>                                   | <b>0.825</b> | <b>0.070</b> | <b>3.436</b> | <b>3.231</b> | <b>0.375</b> | <b>0.236</b> | <b>1.418</b> | <b>0.554</b> | <b>0.545</b> | <b>0.295</b> | <b>FAIL</b> | <b>7.181</b> | <b>212</b> |
| 2,6-Di-tert-butyl-4-methylphenol                     | 0.788        | 0.107        | 6.781        | 0.114        | 0.578        | 0.033        | 1.506        | 0.466        | 0.063        | 0.187        | PASS        | 7.211        | 213        |
| 2-Chloroacetic acid                                  | 0.762        | 0.133        | 4.120        | 2.547        | 0.546        | 0.065        | 0.834        | 1.138        | 0.400        | 0.150        | PASS        | 7.220        | 214        |
| <b>Vanillin</b>                                      | <b>0.925</b> | <b>0.030</b> | <b>4.128</b> | <b>2.539</b> | <b>0.444</b> | <b>0.167</b> | <b>2.583</b> | <b>0.611</b> | <b>0.273</b> | <b>0.023</b> | <b>PASS</b> | <b>7.240</b> | <b>215</b> |
| 1,2-Dimethoxybenzene                                 | 0.907        | 0.012        | 4.214        | 2.453        | 0.473        | 0.138        | 3.655        | 1.683        | 0.200        | 0.050        | PASS        | 7.246        | 216        |
| 3-Isochromanone                                      | 0.783        | 0.112        | 5.052        | 1.615        | 0.529        | 0.082        | 3.665        | 1.693        | 0.182        | 0.068        | PASS        | 7.250        | 217        |
| Diallylsulfide                                       | 0.879        | 0.016        | 5.442        | 1.225        | 0.703        | 0.092        | 1.034        | 0.938        | 0.000        | 0.250        | PASS        | 7.251        | 218        |
| 1,2-Ethanedisulfonic acid                            | 0.525        | 0.370        | 5.333        | 1.334        | 0.514        | 0.097        | 0.000        | 1.972        | 0.600        | 0.350        | FAIL        | 7.255        | 219        |
| <b>Theobromine</b>                                   | <b>0.801</b> | <b>0.094</b> | <b>4.281</b> | <b>2.386</b> | <b>0.426</b> | <b>0.185</b> | <b>1.386</b> | <b>0.586</b> | <b>0.462</b> | <b>0.212</b> | <b>PASS</b> | <b>7.263</b> | <b>220</b> |
| Cyclodecanol                                         | 0.902        | 0.007        | 5.204        | 1.463        | 0.568        | 0.043        | 2.186        | 0.214        | 0.091        | 0.159        | PASS        | 7.264        | 221        |
| Chloroform                                           | 0.944        | 0.049        | 4.592        | 2.075        | 0.720        | 0.109        | 1.129        | 0.843        | 0.000        | 0.250        | PASS        | 7.275        | 222        |
| 2,5-Piperazinedione                                  | 0.764        | 0.131        | 4.199        | 2.468        | 0.499        | 0.112        | 0.000        | 1.972        | 0.500        | 0.250        | PASS        | 7.280        | 223        |
| 2-Isopropyl-5-methylphenol                           | 0.742        | 0.153        | 6.446        | 0.221        | 0.613        | 0.002        | 2.124        | 0.152        | 0.091        | 0.159        | PASS        | 7.285        | 224        |

|                                                |                     |                     |                     |                     |                     |                     |                     |                     |                     |                     |                    |                     |                   |
|------------------------------------------------|---------------------|---------------------|---------------------|---------------------|---------------------|---------------------|---------------------|---------------------|---------------------|---------------------|--------------------|---------------------|-------------------|
| <i>Caffeine</i>                                | <b>0.864</b>        | <b>0.031</b>        | <b>4.261</b>        | <b>2.406</b>        | <b>0.423</b>        | <b>0.188</b>        | <b>1.123</b>        | <b>0.849</b>        | <b>0.429</b>        | <b>0.179</b>        | <b>PASS</b>        | <b>7.293</b>        | <b>225</b>        |
| Tricyclopropylamine                            | 0.954               | 0.059               | 5.324               | 1.343               | 0.585               | 0.026               | 0.632               | 1.340               | 0.100               | 0.150               | PASS               | 7.300               | 226               |
| Benzoïn                                        | 0.689               | 0.206               | 6.499               | 0.168               | 0.560               | 0.051               | 3.742               | 1.770               | 0.125               | 0.125               | PASS               | 7.326               | 227               |
| Ethylenediamine                                | 0.675               | 0.220               | 4.159               | 2.508               | 0.599               | 0.012               | 0.000               | 1.972               | 0.500               | 0.250               | PASS               | 7.344               | 228               |
| 3,5-Dinitrobenzoic acid                        | 0.888               | 0.007               | 3.726               | 2.941               | 0.353               | 0.258               | 1.466               | 0.506               | 0.533               | 0.283               | PASS               | 7.361               | 229               |
| <b><u>Orcinol</u></b>                          | <b><u>0.998</u></b> | <b><u>0.103</u></b> | <b><u>4.054</u></b> | <b><u>2.613</u></b> | <b><u>0.490</u></b> | <b><u>0.121</u></b> | <b><u>2.172</u></b> | <b><u>0.200</u></b> | <b><u>0.222</u></b> | <b><u>0.028</u></b> | <b><u>PASS</u></b> | <b><u>7.377</u></b> | <b><u>230</u></b> |
| <b><u>Acetylsalicylic acid</u></b>             | <b><u>0.834</u></b> | <b><u>0.061</u></b> | <b><u>5.556</u></b> | <b><u>1.111</u></b> | <b><u>0.519</u></b> | <b><u>0.092</u></b> | <b><u>0.296</u></b> | <b><u>1.676</u></b> | <b><u>0.308</u></b> | <b><u>0.058</u></b> | <b><u>PASS</u></b> | <b><u>7.395</u></b> | <b><u>231</u></b> |
| Propan-2-one                                   | 0.822               | 0.073               | 4.179               | 2.488               | 0.630               | 0.019               | 1.888               | 0.084               | 0.250               | 0.000               | PASS               | 7.405               | 232               |
| <b><i>Gallic acid</i></b>                      | <b>0.864</b>        | <b>0.031</b>        | <b>3.483</b>        | <b>3.184</b>        | <b>0.346</b>        | <b>0.265</b>        | <b>5.181</b>        | <b>3.209</b>        | <b>0.417</b>        | <b>0.167</b>        | <b>PASS</b>        | <b>7.414</b>        | <b>233</b>        |
| <b><i>Ethanol</i><sup>CS<sub>D</sub></sup></b> | <b>0.708</b>        | <b>0.187</b>        | <b>4.176</b>        | <b>2.491</b>        | <b>0.643</b>        | <b>0.032</b>        | <b>2.209</b>        | <b>0.237</b>        | <b>0.333</b>        | <b>0.083</b>        | <b>PASS</b>        | <b>7.419</b>        | <b>234</b>        |
| Cycloundecanone                                | 0.886               | 0.009               | 5.644               | 1.023               | 0.611               | 0.000               | 1.859               | 0.113               | 0.083               | 0.167               | PASS               | 7.423               | 235               |
| o-Anisic acid                                  | 0.956               | 0.061               | 4.224               | 2.443               | 0.448               | 0.163               | 2.825               | 0.853               | 0.273               | 0.023               | PASS               | 7.425               | 236               |
| Ethylamine                                     | 0.738               | 0.157               | 4.183               | 2.484               | 0.683               | 0.072               | 0.797               | 1.175               | 0.333               | 0.083               | PASS               | 7.426               | 237               |
| Vanillic acid                                  | 0.885               | 0.010               | 4.123               | 2.544               | 0.432               | 0.179               | 3.521               | 1.549               | 0.333               | 0.083               | PASS               | 7.428               | 238               |
| Cyclodecanone                                  | 0.866               | 0.029               | 5.595               | 1.072               | 0.627               | 0.016               | 1.860               | 0.112               | 0.091               | 0.159               | PASS               | 7.428               | 239               |
| Isocaryolan-9 $\alpha$ -ol                     | 0.774               | 0.121               | 6.691               | 0.024               | 0.613               | 0.002               | 2.497               | 0.525               | 0.063               | 0.187               | PASS               | 7.432               | 240               |
| Butan-2-ol                                     | 0.770               | 0.125               | 5.075               | 1.592               | 0.647               | 0.036               | 2.110               | 0.138               | 0.200               | 0.050               | PASS               | 7.443               | 241               |
| 1,3,5-Trinitrobenzene                          | 0.950               | 0.055               | 3.437               | 3.230               | 0.346               | 0.265               | 0.094               | 1.878               | 0.600               | 0.350               | FAIL               | 7.443               | 242               |
| N,N-Dimethylacetamide                          | 0.822               | 0.073               | 4.164               | 2.503               | 0.564               | 0.047               | 1.942               | 0.030               | 0.333               | 0.083               | PASS               | 7.451               | 243               |
| Methyl acetate                                 | 0.765               | 0.130               | 4.427               | 2.240               | 0.604               | 0.007               | 0.361               | 1.611               | 0.400               | 0.150               | PASS               | 7.456               | 244               |
| 1-Naphthalenesulfonic acid                     | 0.941               | 0.046               | 5.275               | 1.392               | 0.529               | 0.082               | 0.814               | 1.158               | 0.214               | 0.036               | PASS               | 7.457               | 245               |
| [1,1'-Binaphthalene]-2,2'-diol                 | 0.678               | 0.217               | 7.282               | 0.615               | 0.589               | 0.022               | 3.358               | 1.386               | 0.091               | 0.159               | PASS               | 7.458               | 246               |
| <b><i>Propionamide</i></b>                     | <b>0.724</b>        | <b>0.171</b>        | <b>4.497</b>        | <b>2.170</b>        | <b>0.576</b>        | <b>0.035</b>        | <b>1.780</b>        | <b>0.192</b>        | <b>0.400</b>        | <b>0.150</b>        | <b>PASS</b>        | <b>7.482</b>        | <b>247</b>        |
| <b><i>Oxalic acid</i></b>                      | <b>0.763</b>        | <b>0.132</b>        | <b>3.408</b>        | <b>3.259</b>        | <b>0.475</b>        | <b>0.136</b>        | <b>0.000</b>        | <b>1.972</b>        | <b>0.667</b>        | <b>0.417</b>        | <b>FAIL</b>        | <b>7.512</b>        | <b>248</b>        |
| <b><i>Theophylline</i></b>                     | <b>0.879</b>        | <b>0.016</b>        | <b>4.404</b>        | <b>2.263</b>        | <b>0.442</b>        | <b>0.169</b>        | <b>0.829</b>        | <b>1.143</b>        | <b>0.462</b>        | <b>0.212</b>        | <b>PASS</b>        | <b>7.517</b>        | <b>249</b>        |
| 5-Nitroisophthalic acid                        | 0.826               | 0.069               | 3.400               | 3.267               | 0.304               | 0.307               | 6.578               | 4.606               | 0.467               | 0.217               | FAIL               | 7.518               | 250               |
| 2,3-Dimethylpyrazine                           | 0.993               | 0.098               | 4.332               | 2.335               | 0.574               | 0.037               | 0.287               | 1.685               | 0.250               | 0.000               | PASS               | 7.530               | 251               |
| 1,4-Dithiane                                   | 0.986               | 0.091               | 5.277               | 1.390               | 0.747               | 0.136               | 0.000               | 1.972               | 0.000               | 0.250               | PASS               | 7.531               | 252               |
| 2-Ethyl-3-hydroxy-4H-pyran-4-one               | 0.863               | 0.032               | 4.881               | 1.786               | 0.526               | 0.085               | 1.936               | 0.036               | 0.300               | 0.050               | PASS               | 7.554               | 253               |
| 13-epi-Sclareol                                | 0.700               | 0.195               | 7.731               | 1.064               | 0.567               | 0.044               | 3.288               | 1.316               | 0.091               | 0.159               | PASS               | 7.576               | 254               |
| Cholic acid                                    | 0.487               | 0.408               | 8.254               | 1.587               | 0.483               | 0.128               | 6.596               | 4.624               | 0.172               | 0.078               | FAIL               | 7.578               | 255               |
| Chloro(methoxy)methane                         | 0.825               | 0.070               | 4.488               | 2.179               | 0.636               | 0.025               | 2.165               | 0.193               | 0.250               | 0.000               | PASS               | 7.578               | 256               |
| <b><i>Malonic acid</i></b>                     | <b>0.607</b>        | <b>0.288</b>        | <b>4.907</b>        | <b>1.760</b>        | <b>0.582</b>        | <b>0.029</b>        | <b>0.259</b>        | <b>1.713</b>        | <b>0.571</b>        | <b>0.321</b>        | <b>FAIL</b>        | <b>7.579</b>        | <b>257</b>        |
| Carbamazepine                                  | 0.724               | 0.171               | 7.021               | 0.354               | 0.608               | 0.003               | 1.756               | 0.216               | 0.167               | 0.083               | PASS               | 7.584               | 258               |

|                                                              |              |              |              |              |              |              |              |              |              |              |             |              |            |
|--------------------------------------------------------------|--------------|--------------|--------------|--------------|--------------|--------------|--------------|--------------|--------------|--------------|-------------|--------------|------------|
| Biotin                                                       | 0.594        | 0.301        | 6.826        | 0.159        | 0.549        | 0.062        | 2.973        | 1.001        | 0.313        | 0.063        | PASS        | 7.591        | 259        |
| 4-Hydroxy-3,5-dimethoxybenzaldehyde                          | 0.903        | 0.008        | 4.232        | 2.435        | 0.412        | 0.199        | 4.908        | 2.936        | 0.308        | 0.058        | PASS        | 7.595        | 260        |
| N-Methylpyrrolidone                                          | 0.871        | 0.024        | 4.307        | 2.360        | 0.590        | 0.021        | 2.019        | 0.047        | 0.286        | 0.036        | PASS        | 7.601        | 261        |
| DL-Mannitol                                                  | 0.522        | 0.373        | 5.874        | 0.793        | 0.483        | 0.128        | 3.833        | 1.861        | 0.500        | 0.250        | FAIL        | 7.605        | 262        |
| <b>L-Aspartic acid</b>                                       | <b>0.638</b> | <b>0.257</b> | <b>5.235</b> | <b>1.432</b> | <b>0.549</b> | <b>0.062</b> | <b>0.383</b> | <b>1.589</b> | <b>0.556</b> | <b>0.306</b> | <b>FAIL</b> | <b>7.631</b> | <b>263</b> |
| (4R,7S)-7-Isopropyl-4-methyloxepan-2-one                     | 0.715        | 0.180        | 6.421        | 0.246        | 0.591        | 0.020        | 3.702        | 1.730        | 0.167        | 0.083        | PASS        | 7.635        | 264        |
| (2R,3R)-2,3-Dimethylcyclopropane-1-carboxylic acid           | 0.861        | 0.034        | 5.288        | 1.379        | 0.618        | 0.007        | 0.745        | 1.227        | 0.250        | 0.000        | PASS        | 7.638        | 265        |
| Cyclohexanone                                                | 0.860        | 0.035        | 5.217        | 1.450        | 0.672        | 0.061        | 1.913        | 0.059        | 0.143        | 0.107        | PASS        | 7.641        | 266        |
| 4,4,7-Trimethyldecahydro-1H-cyclopenta[cd]inden-7-ol         | 0.855        | 0.040        | 6.618        | 0.049        | 0.631        | 0.020        | 2.084        | 0.112        | 0.067        | 0.183        | PASS        | 7.680        | 267        |
| 2-(Tert-butyl)-4-methoxyphenol                               | 0.736        | 0.159        | 6.686        | 0.019        | 0.603        | 0.008        | 3.227        | 1.255        | 0.154        | 0.096        | PASS        | 7.704        | 268        |
| Diallyldisulfide                                             | 0.845        | 0.050        | 6.301        | 0.366        | 0.771        | 0.160        | 1.334        | 0.638        | 0.000        | 0.250        | PASS        | 7.705        | 269        |
| <b>L-Mandelic acid</b>                                       | <b>0.714</b> | <b>0.181</b> | <b>5.986</b> | <b>0.681</b> | <b>0.633</b> | <b>0.022</b> | <b>2.133</b> | <b>0.161</b> | <b>0.273</b> | <b>0.023</b> | <b>PASS</b> | <b>7.746</b> | <b>270</b> |
| Imidazole                                                    | 0.982        | 0.087        | 3.423        | 3.244        | 0.529        | 0.082        | 1.415        | 0.557        | 0.400        | 0.150        | FAIL        | 7.750        | 271        |
| <b>3,5-Dinitrosalicylic acid<sup>CSD</sup></b>               | <b>0.979</b> | <b>0.084</b> | <b>3.404</b> | <b>3.263</b> | <b>0.336</b> | <b>0.275</b> | <b>2.386</b> | <b>0.414</b> | <b>0.563</b> | <b>0.313</b> | <b>FAIL</b> | <b>7.750</b> | <b>272</b> |
| (5-Hydroxy-6-methylpyridine-3,4-diyl)dimethanol              | 0.896        | 0.001        | 4.532        | 2.135        | 0.461        | 0.150        | 3.866        | 1.894        | 0.333        | 0.083        | PASS        | 7.753        | 273        |
| (-)-Epicedrol                                                | 0.880        | 0.015        | 6.569        | 0.098        | 0.614        | 0.003        | 2.581        | 0.609        | 0.063        | 0.187        | PASS        | 7.754        | 274        |
| <b>Uracil</b>                                                | <b>0.946</b> | <b>0.051</b> | <b>3.406</b> | <b>3.261</b> | <b>0.450</b> | <b>0.161</b> | <b>1.919</b> | <b>0.053</b> | <b>0.500</b> | <b>0.250</b> | <b>FAIL</b> | <b>7.766</b> | <b>275</b> |
| Piperidine                                                   | 0.926        | 0.031        | 5.035        | 1.632        | 0.699        | 0.088        | 0.863        | 1.109        | 0.167        | 0.083        | PASS        | 7.801        | 276        |
| <b>Pyroglutamic acid</b>                                     | <b>0.735</b> | <b>0.160</b> | <b>5.107</b> | <b>1.560</b> | <b>0.569</b> | <b>0.042</b> | <b>1.607</b> | <b>0.365</b> | <b>0.444</b> | <b>0.194</b> | <b>PASS</b> | <b>7.802</b> | <b>277</b> |
| 2,5,5,8α-Tetramethyloctahydro-2H-2,4α-methanonaphthalen-1-ol | 0.797        | 0.098        | 6.935        | 0.268        | 0.692        | 0.081        | 2.106        | 0.134        | 0.063        | 0.187        | PASS        | 7.803        | 278        |
| 1-Hydroxypropan-2-one                                        | 0.768        | 0.127        | 4.168        | 2.499        | 0.557        | 0.054        | 3.924        | 1.952        | 0.400        | 0.150        | PASS        | 7.814        | 279        |
| 3-Oxocyclobutanecarboxylic acid                              | 0.680        | 0.215        | 5.808        | 0.859        | 0.640        | 0.029        | 1.326        | 0.646        | 0.375        | 0.125        | PASS        | 7.818        | 280        |
| 1,1-Dihydroxypropan-2-one                                    | 0.625        | 0.270        | 4.352        | 2.315        | 0.494        | 0.117        | 5.864        | 3.892        | 0.500        | 0.250        | PASS        | 7.848        | 281        |
| D-Altritol                                                   | 0.608        | 0.287        | 6.015        | 0.652        | 0.530        | 0.081        | 2.513        | 0.541        | 0.500        | 0.250        | PASS        | 7.875        | 282        |
| 1,1-bis(4-Hydroxyphenyl)cyclohexane                          | 0.873        | 0.022        | 6.818        | 0.151        | 0.564        | 0.047        | 3.335        | 1.363        | 0.100        | 0.150        | PASS        | 7.879        | 283        |
| 2-Aminoethan-1-ol                                            | 0.678        | 0.217        | 4.360        | 2.307        | 0.625        | 0.014        | 2.238        | 0.266        | 0.500        | 0.250        | PASS        | 7.887        | 284        |
| (1R,2R)-Cyclohexane-1,2-Diamine                              | 0.922        | 0.027        | 5.146        | 1.521        | 0.651        | 0.040        | 0.623        | 1.349        | 0.250        | 0.000        | PASS        | 7.890        | 285        |
| β-Cellobiose                                                 | 0.718        | 0.177        | 5.817        | 0.850        | 0.412        | 0.199        | 3.864        | 1.892        | 0.478        | 0.228        | PASS        | 7.892        | 286        |
| Dihydrofuran-2,5-dione                                       | 0.731        | 0.164        | 4.269        | 2.398        | 0.571        | 0.040        | 4.305        | 2.333        | 0.429        | 0.179        | PASS        | 7.940        | 287        |
| 3S-cis-3,6-Dimethyl-1,4-dioxane-2,5-dione                    | 0.785        | 0.110        | 5.030        | 1.637        | 0.560        | 0.051        | 2.743        | 0.771        | 0.400        | 0.150        | PASS        | 7.948        | 288        |
| Butyric acid                                                 | 0.744        | 0.151        | 5.332        | 1.335        | 0.724        | 0.113        | 0.806        | 1.166        | 0.333        | 0.083        | PASS        | 7.952        | 289        |
| Trimethylamine                                               | 0.996        | 0.101        | 4.289        | 2.378        | 0.665        | 0.054        | 0.904        | 1.068        | 0.250        | 0.000        | PASS        | 7.961        | 290        |

|                                                                                                                                |              |              |              |              |              |              |              |              |              |              |             |              |            |
|--------------------------------------------------------------------------------------------------------------------------------|--------------|--------------|--------------|--------------|--------------|--------------|--------------|--------------|--------------|--------------|-------------|--------------|------------|
| <b>L-Malic acid</b>                                                                                                            | <b>0.661</b> | <b>0.234</b> | <b>5.200</b> | <b>1.467</b> | <b>0.564</b> | <b>0.047</b> | <b>1.693</b> | <b>0.279</b> | <b>0.556</b> | <b>0.306</b> | <b>FAIL</b> | <b>7.969</b> | <b>291</b> |
| Melamine                                                                                                                       | 0.990        | 0.095        | 3.419        | 3.248        | 0.398        | 0.213        | 0.022        | 1.950        | 0.667        | 0.417        | FAIL        | 7.972        | 292        |
| <b>Picric acid<sup>CSD</sup></b>                                                                                               | <b>0.928</b> | <b>0.033</b> | <b>3.722</b> | <b>2.945</b> | <b>0.372</b> | <b>0.239</b> | <b>2.121</b> | <b>0.149</b> | <b>0.625</b> | <b>0.375</b> | <b>FAIL</b> | <b>7.982</b> | <b>293</b> |
| cis,cis-1,3,5-Cyclohexanetricarboxylic acid                                                                                    | 0.923        | 0.028        | 5.480        | 1.187        | 0.524        | 0.087        | 0.424        | 1.548        | 0.400        | 0.150        | PASS        | 8.011        | 294        |
| 2,2'-Dihydroxy-5,5'-diallyl-biphenyl                                                                                           | 0.886        | 0.009        | 6.779        | 0.112        | 0.581        | 0.030        | 3.610        | 1.638        | 0.100        | 0.150        | PASS        | 8.017        | 295        |
| <b>L-Proline</b>                                                                                                               | <b>0.740</b> | <b>0.155</b> | <b>5.696</b> | <b>0.971</b> | <b>0.678</b> | <b>0.067</b> | <b>0.892</b> | <b>1.080</b> | <b>0.375</b> | <b>0.125</b> | <b>PASS</b> | <b>8.042</b> | <b>296</b> |
| <b>DL-Malic acid</b>                                                                                                           | <b>0.652</b> | <b>0.243</b> | <b>5.254</b> | <b>1.413</b> | <b>0.576</b> | <b>0.035</b> | <b>2.119</b> | <b>0.147</b> | <b>0.556</b> | <b>0.306</b> | <b>FAIL</b> | <b>8.072</b> | <b>297</b> |
| 2,2,2-Trifluoroethanol                                                                                                         | 0.831        | 0.064        | 5.147        | 1.520        | 0.798        | 0.187        | 2.038        | 0.066        | 0.167        | 0.083        | PASS        | 8.087        | 298        |
| N,N-Dimethylformamide                                                                                                          | 0.903        | 0.008        | 4.164        | 2.503        | 0.610        | 0.001        | 1.825        | 0.147        | 0.400        | 0.150        | PASS        | 8.088        | 299        |
| (Z)-Ethyl 2-benzylidene-3-oxobutanoate                                                                                         | 0.957        | 0.062        | 6.436        | 0.231        | 0.579        | 0.032        | 1.605        | 0.367        | 0.188        | 0.062        | PASS        | 8.095        | 300        |
| <b>Citric acid</b>                                                                                                             | <b>0.643</b> | <b>0.252</b> | <b>6.050</b> | <b>0.617</b> | <b>0.552</b> | <b>0.059</b> | <b>1.953</b> | <b>0.019</b> | <b>0.538</b> | <b>0.288</b> | <b>PASS</b> | <b>8.113</b> | <b>301</b> |
| Proline                                                                                                                        | 0.759        | 0.136        | 5.722        | 0.945        | 0.691        | 0.080        | 0.818        | 1.154        | 0.375        | 0.125        | PASS        | 8.146        | 302        |
| Xylitol                                                                                                                        | 0.687        | 0.208        | 5.859        | 0.808        | 0.591        | 0.020        | 1.605        | 0.367        | 0.500        | 0.250        | PASS        | 8.150        | 303        |
| Dimethylsulfoxide                                                                                                              | 0.901        | 0.006        | 4.753        | 1.914        | 0.695        | 0.084        | 2.352        | 0.380        | 0.250        | 0.000        | PASS        | 8.152        | 304        |
| cis-Aconitic acid                                                                                                              | 0.694        | 0.201        | 6.167        | 0.500        | 0.592        | 0.019        | 0.903        | 1.069        | 0.500        | 0.250        | PASS        | 8.153        | 305        |
| 4-(Hydroxymethyl)-2-methoxyphenol                                                                                              | 0.951        | 0.056        | 5.238        | 1.429        | 0.582        | 0.029        | 2.512        | 0.540        | 0.273        | 0.023        | PASS        | 8.157        | 306        |
| 4-Methylmorpholine                                                                                                             | 0.877        | 0.018        | 4.992        | 1.675        | 0.668        | 0.057        | 2.302        | 0.330        | 0.286        | 0.036        | PASS        | 8.164        | 307        |
| Thiourea                                                                                                                       | 0.994        | 0.099        | 3.600        | 3.067        | 0.559        | 0.052        | 0.655        | 1.317        | 0.500        | 0.250        | PASS        | 8.165        | 308        |
| Acetylmethionine                                                                                                               | 0.796        | 0.099        | 6.212        | 0.455        | 0.606        | 0.005        | 2.007        | 0.035        | 0.333        | 0.083        | PASS        | 8.165        | 309        |
| Eucalyptol                                                                                                                     | 0.808        | 0.087        | 6.662        | 0.005        | 0.774        | 0.163        | 2.433        | 0.461        | 0.091        | 0.159        | PASS        | 8.203        | 310        |
| 1-Hydroxydiamantane                                                                                                            | 0.896        | 0.001        | 6.676        | 0.009        | 0.727        | 0.116        | 2.234        | 0.262        | 0.067        | 0.183        | PASS        | 8.205        | 311        |
| <b>Succinic acid</b>                                                                                                           | <b>0.706</b> | <b>0.189</b> | <b>5.327</b> | <b>1.340</b> | <b>0.647</b> | <b>0.036</b> | <b>1.338</b> | <b>0.634</b> | <b>0.500</b> | <b>0.250</b> | <b>PASS</b> | <b>8.205</b> | <b>312</b> |
| <b>Glycolic acid</b>                                                                                                           | <b>0.767</b> | <b>0.128</b> | <b>4.159</b> | <b>2.508</b> | <b>0.590</b> | <b>0.021</b> | <b>1.607</b> | <b>0.365</b> | <b>0.600</b> | <b>0.350</b> | <b>FAIL</b> | <b>8.219</b> | <b>313</b> |
| Cyclobutanol                                                                                                                   | 0.906        | 0.011        | 4.976        | 1.691        | 0.738        | 0.127        | 2.379        | 0.407        | 0.200        | 0.050        | PASS        | 8.228        | 314        |
| Pyruvic acid                                                                                                                   | 0.872        | 0.023        | 4.164        | 2.503        | 0.610        | 0.001        | 1.260        | 0.712        | 0.500        | 0.250        | PASS        | 8.233        | 315        |
| 1-Amino-1-methylcyclopropane                                                                                                   | 0.927        | 0.032        | 4.938        | 1.729        | 0.798        | 0.187        | 0.793        | 1.179        | 0.200        | 0.050        | PASS        | 8.235        | 316        |
| (+)-Camphoric acid                                                                                                             | 0.719        | 0.176        | 7.101        | 0.434        | 0.702        | 0.091        | 1.137        | 0.835        | 0.286        | 0.036        | PASS        | 8.235        | 317        |
| <b>Piperazine</b>                                                                                                              | <b>0.924</b> | <b>0.029</b> | <b>5.025</b> | <b>1.642</b> | <b>0.708</b> | <b>0.097</b> | <b>0.000</b> | <b>1.972</b> | <b>0.333</b> | <b>0.083</b> | <b>PASS</b> | <b>8.244</b> | <b>318</b> |
| 3 $\alpha$ ,4,7,7-Tetramethyl-(3 $\alpha$ R,4S,6 $\alpha$ R,10 $\alpha$ S)-perhydronaphtho(8 $\alpha$ ,1- $\beta$ )furan-2-one | 0.766        | 0.129        | 7.248        | 0.581        | 0.679        | 0.068        | 4.072        | 2.100        | 0.111        | 0.139        | PASS        | 8.247        | 319        |
| Trifluoroacetic acid                                                                                                           | 0.843        | 0.052        | 4.822        | 1.845        | 0.767        | 0.156        | 1.770        | 0.202        | 0.286        | 0.036        | PASS        | 8.272        | 320        |
| (-)-1,3,3-Trimethyl-2-norbornanone                                                                                             | 0.888        | 0.007        | 6.521        | 0.146        | 0.756        | 0.145        | 1.965        | 0.007        | 0.091        | 0.159        | PASS        | 8.273        | 321        |
| 2,8,16,20-Tetramethylcalix(4)resorcinarene                                                                                     | 0.734        | 0.161        | 8.705        | 2.038        | 0.600        | 0.011        | 2.153        | 0.181        | 0.200        | 0.050        | PASS        | 8.287        | 322        |
| <b>1,4-Dioxane<sup>CSD</sup></b>                                                                                               | <b>0.882</b> | <b>0.013</b> | <b>5.023</b> | <b>1.644</b> | <b>0.761</b> | <b>0.150</b> | <b>0.000</b> | <b>1.972</b> | <b>0.333</b> | <b>0.083</b> | <b>PASS</b> | <b>8.300</b> | <b>323</b> |

|                                                               |                     |                     |                     |                     |                     |                     |                     |                     |                     |                     |                    |                     |                   |
|---------------------------------------------------------------|---------------------|---------------------|---------------------|---------------------|---------------------|---------------------|---------------------|---------------------|---------------------|---------------------|--------------------|---------------------|-------------------|
| Acetic acid                                                   | 0.864               | 0.031               | 4.099               | 2.568               | 0.674               | 0.063               | 0.699               | 1.273               | 0.500               | 0.250               | PASS               | 8.325               | 324               |
| 1,7,7-Trimethyltricyclo(2.2.1.0 <sup>2,6</sup> )heptan-4-ol   | 0.829               | 0.066               | 6.688               | 0.021               | 0.795               | 0.184               | 2.302               | 0.330               | 0.091               | 0.159               | PASS               | 8.333               | 325               |
| (1R,2S)-2-Methyl-4-oxocyclohexane-1-carboxylic acid           | 0.865               | 0.030               | 6.213               | 0.454               | 0.680               | 0.069               | 1.334               | 0.638               | 0.273               | 0.023               | PASS               | 8.340               | 326               |
| D-Iditol                                                      | 0.710               | 0.185               | 6.151               | 0.516               | 0.583               | 0.028               | 1.977               | 0.005               | 0.500               | 0.250               | PASS               | 8.348               | 327               |
| Caryophyllen- $\alpha$ -oxide                                 | 0.874               | 0.021               | 7.084               | 0.417               | 0.699               | 0.088               | 3.581               | 1.609               | 0.063               | 0.187               | PASS               | 8.372               | 328               |
| Scyllo-inositol                                               | 0.968               | 0.073               | 5.082               | 1.585               | 0.549               | 0.062               | 0.000               | 1.972               | 0.500               | 0.250               | PASS               | 8.393               | 329               |
| Glycerol                                                      | 0.728               | 0.167               | 5.092               | 1.575               | 0.614               | 0.003               | 3.222               | 1.250               | 0.500               | 0.250               | PASS               | 8.401               | 330               |
| DL-Tyrosine                                                   | 0.581               | 0.314               | 5.712               | 0.955               | 0.492               | 0.119               | 11.456              | 9.484               | 0.308               | 0.058               | FAIL               | 8.408               | 331               |
| o- $\beta$ -D-Mannopyranosyl-(1-4)- $\alpha$ -D-mannopyranose | 0.741               | 0.154               | 6.375               | 0.292               | 0.490               | 0.121               | 3.799               | 1.827               | 0.478               | 0.228               | PASS               | 8.411               | 332               |
| D-Glucuronic acid                                             | 0.818               | 0.077               | 5.213               | 1.454               | 0.516               | 0.095               | 2.720               | 0.748               | 0.538               | 0.288               | PASS               | 8.417               | 333               |
| Ribitol                                                       | 0.692               | 0.203               | 5.797               | 0.870               | 0.586               | 0.025               | 3.498               | 1.526               | 0.500               | 0.250               | PASS               | 8.447               | 334               |
| Tryphenylphosphine oxide                                      | 0.972               | 0.077               | 7.819               | 1.152               | 0.654               | 0.043               | 2.140               | 0.168               | 0.050               | 0.200               | PASS               | 8.465               | 335               |
| <b><i>E-Caprolactam</i><sup>CSD</sup></b>                     | <b>0.953</b>        | <b>0.058</b>        | <b>5.457</b>        | <b>1.210</b>        | <b>0.689</b>        | <b>0.078</b>        | <b>2.106</b>        | <b>0.134</b>        | <b>0.250</b>        | <b>0.000</b>        | <b>PASS</b>        | <b>8.474</b>        | <b>336</b>        |
| <b><i>Saccharin</i><sup>CSD</sup></b>                         | <b>0.947</b>        | <b>0.052</b>        | <b>5.475</b>        | <b>1.192</b>        | <b>0.618</b>        | <b>0.007</b>        | <b>2.048</b>        | <b>0.076</b>        | <b>0.333</b>        | <b>0.083</b>        | <b>PASS</b>        | <b>8.475</b>        | <b>337</b>        |
| Tetrabromomethane                                             | 0.997               | 0.102               | 6.172               | 0.495               | 0.920               | 0.309               | 0.019               | 1.953               | 0.000               | 0.250               | FAIL               | 8.476               | 338               |
| Formamide                                                     | 0.860               | 0.035               | 3.400               | 3.267               | 0.579               | 0.032               | 1.659               | 0.313               | 0.667               | 0.417               | FAIL               | 8.480               | 339               |
| D-Glucitol                                                    | 0.605               | 0.290               | 6.136               | 0.531               | 0.552               | 0.059               | 5.473               | 3.501               | 0.500               | 0.250               | PASS               | 8.481               | 340               |
| $\beta$ -D-Allose                                             | 0.830               | 0.065               | 5.636               | 1.031               | 0.617               | 0.006               | 0.802               | 1.170               | 0.500               | 0.250               | PASS               | 8.502               | 341               |
| <b><u>L-Ascorbic acid</u></b>                                 | <b><u>0.782</u></b> | <b><u>0.113</u></b> | <b><u>6.017</u></b> | <b><u>0.650</u></b> | <b><u>0.616</u></b> | <b><u>0.005</u></b> | <b><u>1.142</u></b> | <b><u>0.830</u></b> | <b><u>0.500</u></b> | <b><u>0.250</u></b> | <b><u>PASS</u></b> | <b><u>8.518</u></b> | <b><u>342</u></b> |
| Oxetane                                                       | 0.955               | 0.060               | 4.422               | 2.245               | 0.751               | 0.140               | 3.156               | 1.184               | 0.250               | 0.000               | PASS               | 8.562               | 343               |
| D-Arabinitol                                                  | 0.597               | 0.298               | 5.823               | 0.844               | 0.534               | 0.077               | 7.155               | 5.183               | 0.500               | 0.250               | PASS               | 8.576               | 344               |
| DL-Arabinitol                                                 | 0.597               | 0.298               | 5.821               | 0.846               | 0.534               | 0.077               | 7.159               | 5.187               | 0.500               | 0.250               | PASS               | 8.576               | 345               |
| $\alpha$ -Lactose                                             | 0.817               | 0.078               | 5.638               | 1.029               | 0.444               | 0.167               | 5.751               | 3.779               | 0.478               | 0.228               | PASS               | 8.590               | 346               |
| Acetamide                                                     | 0.944               | 0.049               | 3.969               | 2.698               | 0.636               | 0.025               | 1.804               | 0.168               | 0.500               | 0.250               | PASS               | 8.591               | 347               |
| <b><i>Tartaric acid</i><sup>CSD</sup></b>                     | <b>0.674</b>        | <b>0.221</b>        | <b>5.858</b>        | <b>0.809</b>        | <b>0.672</b>        | <b>0.061</b>        | <b>0.744</b>        | <b>1.228</b>        | <b>0.600</b>        | <b>0.350</b>        | <b>FAIL</b>        | <b>8.598</b>        | <b>348</b>        |
| $\alpha$ -D-Glucose                                           | 0.842               | 0.053               | 5.353               | 1.314               | 0.546               | 0.065               | 3.250               | 1.278               | 0.500               | 0.250               | PASS               | 8.607               | 349               |
| <b><i>Urea</i></b>                                            | <b>0.880</b>        | <b>0.015</b>        | <b>3.400</b>        | <b>3.267</b>        | <b>0.526</b>        | <b>0.085</b>        | <b>1.544</b>        | <b>0.428</b>        | <b>0.750</b>        | <b>0.500</b>        | <b>FAIL</b>        | <b>8.615</b>        | <b>350</b>        |
| n-Methyl-D-glucamine                                          | 0.702               | 0.193               | 6.975               | 0.308               | 0.603               | 0.008               | 2.565               | 0.593               | 0.462               | 0.212               | PASS               | 8.620               | 351               |
| Tetrahydrofuran                                               | 0.943               | 0.048               | 5.018               | 1.649               | 0.792               | 0.181               | 2.773               | 0.801               | 0.200               | 0.050               | PASS               | 8.623               | 352               |
| 2-Hydroxyacetamide                                            | 0.871               | 0.024               | 4.159               | 2.508               | 0.637               | 0.026               | 1.124               | 0.848               | 0.600               | 0.350               | FAIL               | 8.644               | 353               |
| 2,2',2''-Nitrilotriethanol                                    | 0.789               | 0.106               | 5.756               | 0.911               | 0.593               | 0.018               | 4.792               | 2.820               | 0.400               | 0.150               | PASS               | 8.651               | 354               |
| D-Mannitol                                                    | 0.669               | 0.226               | 6.359               | 0.308               | 0.618               | 0.007               | 3.426               | 1.454               | 0.500               | 0.250               | PASS               | 8.652               | 355               |
| D-Glucono-1,5-lactone                                         | 0.895               | 0.000               | 5.575               | 1.092               | 0.607               | 0.004               | 1.021               | 0.951               | 0.500               | 0.250               | PASS               | 8.693               | 356               |



|                                                                          |              |              |              |              |              |              |              |              |              |              |             |              |            |
|--------------------------------------------------------------------------|--------------|--------------|--------------|--------------|--------------|--------------|--------------|--------------|--------------|--------------|-------------|--------------|------------|
| 1,4-Diazabicyclo[2.2.2]octane                                            | 0.916        | 0.021        | 5.673        | 0.994        | 0.862        | 0.251        | 0.001        | 1.971        | 0.250        | 0.000        | PASS        | 8.696        | 357        |
| β-Maltose                                                                | 0.663        | 0.232        | 6.536        | 0.131        | 0.490        | 0.121        | 7.016        | 5.044        | 0.478        | 0.228        | PASS        | 8.751        | 358        |
| L-Tyrosine                                                               | 0.579        | 0.316        | 5.724        | 0.943        | 0.492        | 0.119        | 13.540       | 11.568       | 0.308        | 0.058        | FAIL        | 8.756        | 359        |
| DL-Ribose                                                                | 0.813        | 0.082        | 5.428        | 1.239        | 0.623        | 0.012        | 3.030        | 1.058        | 0.500        | 0.250        | PASS        | 8.779        | 360        |
| L-Ribose                                                                 | 0.813        | 0.082        | 5.428        | 1.239        | 0.623        | 0.012        | 3.030        | 1.058        | 0.500        | 0.250        | PASS        | 8.779        | 361        |
| α-L-Xylopyranose                                                         | 0.862        | 0.033        | 5.336        | 1.331        | 0.632        | 0.021        | 2.069        | 0.097        | 0.500        | 0.250        | PASS        | 8.780        | 362        |
| Formaldehyde                                                             | 0.945        | 0.050        | 3.400        | 3.267        | 0.756        | 0.145        | 1.675        | 0.297        | 0.500        | 0.250        | FAIL        | 8.833        | 363        |
| Formic acid                                                              | 0.953        | 0.058        | 3.400        | 3.267        | 0.645        | 0.034        | 0.579        | 1.393        | 0.667        | 0.417        | FAIL        | 8.838        | 364        |
| β-D-Galactose                                                            | 0.867        | 0.028        | 5.585        | 1.082        | 0.593        | 0.018        | 2.793        | 0.821        | 0.500        | 0.250        | PASS        | 8.853        | 365        |
| β-galabiose                                                              | 0.832        | 0.063        | 6.650        | 0.017        | 0.549        | 0.062        | 2.943        | 0.971        | 0.478        | 0.228        | PASS        | 8.860        | 366        |
| S(+)-Camphor-10-sulfonic acid                                            | 0.764        | 0.131        | 7.665        | 0.998        | 0.739        | 0.128        | 2.613        | 0.641        | 0.267        | 0.017        | PASS        | 8.873        | 367        |
| α-D-Galactose                                                            | 0.777        | 0.118        | 5.673        | 0.994        | 0.564        | 0.047        | 5.122        | 3.150        | 0.500        | 0.250        | PASS        | 8.877        | 368        |
| Sucralose                                                                | 0.789        | 0.106        | 8.295        | 1.628        | 0.665        | 0.054        | 0.973        | 0.999        | 0.348        | 0.098        | PASS        | 8.879        | 369        |
| (3αR,4R,6αS,10αS)-3α,4,7,7-Tetramethylperhydronaphtho(8α,1-β)furan-2-one | 0.857        | 0.038        | 7.791        | 1.124        | 0.734        | 0.123        | 3.912        | 1.940        | 0.111        | 0.139        | PASS        | 8.882        | 370        |
| neo-Inositol                                                             | 0.979        | 0.084        | 5.483        | 1.184        | 0.643        | 0.032        | 0.000        | 1.972        | 0.500        | 0.250        | PASS        | 8.894        | 371        |
| <b>Trichloroacetic acid<sup>CSD</sup></b>                                | <b>0.875</b> | <b>0.020</b> | <b>6.149</b> | <b>0.518</b> | <b>0.849</b> | <b>0.238</b> | <b>0.860</b> | <b>1.112</b> | <b>0.286</b> | <b>0.036</b> | <b>PASS</b> | <b>8.931</b> | <b>372</b> |
| α-D-Tagatopyranose                                                       | 0.713        | 0.182        | 5.917        | 0.750        | 0.627        | 0.016        | 4.917        | 2.945        | 0.500        | 0.250        | PASS        | 8.940        | 373        |
| β-L-Lyxopyranose                                                         | 0.823        | 0.072        | 5.344        | 1.323        | 0.609        | 0.002        | 4.395        | 2.423        | 0.500        | 0.250        | PASS        | 8.964        | 374        |
| Morpholine                                                               | 0.984        | 0.089        | 5.034        | 1.633        | 0.765        | 0.154        | 2.006        | 0.034        | 0.333        | 0.083        | PASS        | 8.985        | 375        |
| α-L-Sorbopyranose                                                        | 0.815        | 0.080        | 5.879        | 0.788        | 0.604        | 0.007        | 4.170        | 2.198        | 0.500        | 0.250        | PASS        | 9.048        | 376        |
| l-Iditol                                                                 | 0.757        | 0.138        | 6.205        | 0.462        | 0.629        | 0.018        | 4.181        | 2.209        | 0.500        | 0.250        | PASS        | 9.055        | 377        |
| β-D-Glucose                                                              | 0.921        | 0.026        | 5.371        | 1.296        | 0.587        | 0.024        | 3.562        | 1.590        | 0.500        | 0.250        | PASS        | 9.069        | 378        |
| Ethylene oxide                                                           | 0.905        | 0.010        | 4.266        | 2.401        | 0.862        | 0.251        | 3.427        | 1.455        | 0.333        | 0.083        | PASS        | 9.084        | 379        |
| Lactic acid                                                              | 0.851        | 0.044        | 5.284        | 1.383        | 0.738        | 0.127        | 1.999        | 0.027        | 0.500        | 0.250        | PASS        | 9.102        | 380        |
| Neotame                                                                  | 0.633        | 0.262        | 6.683        | 0.016        | 0.381        | 0.230        | 16.190       | 14.218       | 0.259        | 0.009        | FAIL        | 9.103        | 381        |
| β-Lactose                                                                | 0.748        | 0.147        | 6.335        | 0.332        | 0.477        | 0.134        | 8.164        | 6.192        | 0.478        | 0.228        | FAIL        | 9.109        | 382        |
| 4-tert-Butyl-3-methoxy-2,6-dinitrotoluene                                | 0.946        | 0.051        | 6.713        | 0.046        | 0.654        | 0.043        | 2.112        | 0.140        | 0.368        | 0.118        | PASS        | 9.115        | 383        |
| <b>L-Tartaric acid</b>                                                   | <b>0.711</b> | <b>0.184</b> | <b>5.887</b> | <b>0.780</b> | <b>0.692</b> | <b>0.081</b> | <b>2.656</b> | <b>0.684</b> | <b>0.600</b> | <b>0.350</b> | <b>FAIL</b> | <b>9.120</b> | <b>384</b> |
| 2-Amino-5-picolinic acid                                                 | 0.664        | 0.231        | 3.451        | 3.216        | 0.343        | 0.268        | 20.025       | 18.053       | 0.400        | 0.150        | FAIL        | 9.189        | 385        |
| Methanol                                                                 | 0.876        | 0.019        | 3.996        | 2.671        | 0.848        | 0.237        | 2.099        | 0.127        | 0.500        | 0.250        | PASS        | 9.201        | 386        |
| myo-Inositol                                                             | 0.990        | 0.095        | 5.535        | 1.132        | 0.665        | 0.054        | 1.463        | 0.509        | 0.500        | 0.250        | PASS        | 9.272        | 387        |
| (R)-2-Hydroxypropanamide                                                 | 0.920        | 0.025        | 5.361        | 1.306        | 0.761        | 0.150        | 1.288        | 0.684        | 0.500        | 0.250        | PASS        | 9.312        | 388        |
| (S)-2-Hydroxypropanamide                                                 | 0.920        | 0.025        | 5.361        | 1.306        | 0.761        | 0.150        | 1.288        | 0.684        | 0.500        | 0.250        | PASS        | 9.312        | 389        |

|                                                                          |              |              |              |              |              |              |               |               |              |              |             |              |            |
|--------------------------------------------------------------------------|--------------|--------------|--------------|--------------|--------------|--------------|---------------|---------------|--------------|--------------|-------------|--------------|------------|
| DL-Methionine                                                            | 0.587        | 0.308        | 5.471        | 1.196        | 0.510        | 0.101        | 16.415        | 14.443        | 0.333        | 0.083        | FAIL        | 9.338        | 390        |
| (3αR,4S,6αS,10αS)-3α,4,7,7-Tetramethylperhydronaphtho(8α,1-β)furan-2-one | 0.925        | 0.030        | 8.015        | 1.348        | 0.774        | 0.163        | 4.049         | 2.077         | 0.111        | 0.139        | PASS        | 9.339        | 391        |
| Tromethamine                                                             | 0.905        | 0.010        | 5.686        | 0.981        | 0.724        | 0.113        | 1.940         | 0.032         | 0.500        | 0.250        | PASS        | 9.340        | 392        |
| β-D-Psicose                                                              | 0.806        | 0.089        | 6.080        | 0.587        | 0.699        | 0.088        | 3.770         | 1.798         | 0.500        | 0.250        | PASS        | 9.360        | 393        |
| 2-Methylpropan-2-ol                                                      | 0.985        | 0.090        | 5.927        | 0.740        | 0.911        | 0.300        | 2.172         | 0.200         | 0.200        | 0.050        | FAIL        | 9.371        | 394        |
| epi-Inositol                                                             | 0.904        | 0.009        | 5.762        | 0.905        | 0.656        | 0.045        | 3.573         | 1.601         | 0.500        | 0.250        | PASS        | 9.388        | 395        |
| Sucrose                                                                  | 0.835        | 0.060        | 6.829        | 0.162        | 0.605        | 0.006        | 4.564         | 2.592         | 0.478        | 0.228        | PASS        | 9.402        | 396        |
| L-Tryptophan                                                             | 0.716        | 0.179        | 5.801        | 0.866        | 0.491        | 0.120        | 15.484        | 13.512        | 0.267        | 0.017        | FAIL        | 9.406        | 397        |
| α,α-Galacto-trehalose                                                    | 0.684        | 0.211        | 7.958        | 1.291        | 0.613        | 0.002        | 5.476         | 3.504         | 0.478        | 0.228        | PASS        | 9.447        | 398        |
| α-D-Talose                                                               | 0.883        | 0.012        | 5.992        | 0.675        | 0.657        | 0.046        | 4.085         | 2.113         | 0.500        | 0.250        | PASS        | 9.481        | 399        |
| Ethylene glycol                                                          | 0.866        | 0.029        | 5.143        | 1.524        | 0.845        | 0.234        | 2.053         | 0.081         | 0.500        | 0.250        | PASS        | 9.505        | 400        |
| 2,2-Dibromo-2-cyanoacetamide                                             | 0.840        | 0.055        | 6.843        | 0.176        | 0.836        | 0.225        | 2.552         | 0.580         | 0.375        | 0.125        | PASS        | 9.573        | 401        |
| β-D-Gulose                                                               | 0.825        | 0.070        | 6.135        | 0.532        | 0.659        | 0.048        | 5.942         | 3.970         | 0.500        | 0.250        | PASS        | 9.658        | 402        |
| DL-Tryptophan                                                            | 0.713        | 0.182        | 6.073        | 0.594        | 0.532        | 0.079        | 15.881        | 13.909        | 0.267        | 0.017        | FAIL        | 9.696        | 403        |
| Cyclohexane-1,2,3,4,5,6-hexol                                            | 0.878        | 0.017        | 6.156        | 0.511        | 0.699        | 0.088        | 4.407         | 2.435         | 0.500        | 0.250        | PASS        | 9.723        | 404        |
| Hexamethylenetetramine                                                   | 0.929        | 0.034        | 6.526        | 0.141        | 0.929        | 0.318        | 0.000         | 1.972         | 0.400        | 0.150        | FAIL        | 9.756        | 405        |
| DL-Glutamine                                                             | 0.638        | 0.257        | 5.433        | 1.234        | 0.535        | 0.076        | 14.333        | 12.361        | 0.500        | 0.250        | FAIL        | 9.799        | 406        |
| Cyclohexane-1,2,3,4,5,6-hexaol                                           | 0.958        | 0.063        | 6.243        | 0.424        | 0.738        | 0.127        | 2.381         | 0.409         | 0.500        | 0.250        | PASS        | 9.808        | 407        |
| β-DL-Arabinose                                                           | 0.992        | 0.097        | 5.438        | 1.229        | 0.702        | 0.091        | 4.047         | 2.075         | 0.500        | 0.250        | PASS        | 9.818        | 408        |
| D-Asparagine                                                             | 0.700        | 0.195        | 5.209        | 1.458        | 0.572        | 0.039        | 11.779        | 9.807         | 0.556        | 0.306        | FAIL        | 9.825        | 409        |
| Sucrose octa-acetate                                                     | 0.884        | 0.011        | 10.344       | 3.677        | 0.620        | 0.009        | 1.230         | 0.742         | 0.404        | 0.154        | FAIL        | 9.890        | 410        |
| <b>DL-Aspartic acid</b>                                                  | <b>0.689</b> | <b>0.206</b> | <b>5.222</b> | <b>1.445</b> | <b>0.565</b> | <b>0.046</b> | <b>12.555</b> | <b>10.583</b> | <b>0.556</b> | <b>0.306</b> | <b>FAIL</b> | <b>9.899</b> | <b>411</b> |
| α-Maltose                                                                | 0.857        | 0.038        | 7.106        | 0.439        | 0.597        | 0.014        | 7.144         | 5.172         | 0.478        | 0.228        | PASS        | 9.964        | 412        |
| 5,5-Diethylbarbituric acid                                               | 0.964        | 0.069        | 7.697        | 1.030        | 0.859        | 0.248        | 0.664         | 1.308         | 0.385        | 0.135        | PASS        | 10.038       | 413        |
| Meso-Tartaric acid                                                       | 0.912        | 0.017        | 6.233        | 0.434        | 0.777        | 0.166        | 1.881         | 0.091         | 0.600        | 0.350        | FAIL        | 10.055       | 414        |
| Nitromethane                                                             | 0.993        | 0.098        | 4.007        | 2.660        | 0.759        | 0.148        | 2.009         | 0.037         | 0.750        | 0.500        | FAIL        | 10.093       | 415        |
| D-Isoleucine                                                             | 0.779        | 0.116        | 6.195        | 0.472        | 0.677        | 0.066        | 13.007        | 11.035        | 0.333        | 0.083        | FAIL        | 10.215       | 416        |
| β-D-Fructopyranose                                                       | 0.929        | 0.034        | 6.596        | 0.071        | 0.794        | 0.183        | 3.657         | 1.685         | 0.500        | 0.250        | PASS        | 10.242       | 417        |
| L-chiro-Inositol                                                         | 0.895        | 0.000        | 6.157        | 0.510        | 0.700        | 0.089        | 7.420         | 5.448         | 0.500        | 0.250        | PASS        | 10.289       | 418        |
| D-(+)-chiro-Inositol                                                     | 0.902        | 0.007        | 6.190        | 0.477        | 0.706        | 0.095        | 7.232         | 5.260         | 0.500        | 0.250        | PASS        | 10.312       | 419        |
| β-D-Altropyranose                                                        | 0.919        | 0.024        | 6.046        | 0.621        | 0.703        | 0.092        | 7.339         | 5.367         | 0.500        | 0.250        | PASS        | 10.329       | 420        |
| L-Methionine                                                             | 0.686        | 0.209        | 6.249        | 0.418        | 0.670        | 0.059        | 15.629        | 13.657        | 0.333        | 0.083        | FAIL        | 10.348       | 421        |
| DL-Cysteine                                                              | 0.743        | 0.152        | 5.362        | 1.305        | 0.651        | 0.040        | 14.987        | 13.015        | 0.429        | 0.179        | FAIL        | 10.406       | 422        |

|                                         |                     |                     |                     |                     |                     |                     |                      |                      |                     |                     |                    |                      |                   |
|-----------------------------------------|---------------------|---------------------|---------------------|---------------------|---------------------|---------------------|----------------------|----------------------|---------------------|---------------------|--------------------|----------------------|-------------------|
| Adamantane-1,3,5,7-tetracarboxylic acid | 0.950               | 0.055               | 9.143               | 2.476               | 0.874               | 0.263               | 0.737                | 1.235                | 0.364               | 0.114               | PASS               | 10.436               | 423               |
| cis-Inositol                            | 0.974               | 0.079               | 5.803               | 0.864               | 0.730               | 0.119               | 6.899                | 4.927                | 0.500               | 0.250               | PASS               | 10.455               | 424               |
| Muco-inositol                           | 0.989               | 0.094               | 6.271               | 0.396               | 0.757               | 0.146               | 5.203                | 3.231                | 0.500               | 0.250               | PASS               | 10.461               | 425               |
| Trimethylamine oxide                    | 0.922               | 0.027               | 5.713               | 0.954               | 0.876               | 0.265               | 7.407                | 5.435                | 0.400               | 0.150               | PASS               | 10.536               | 426               |
| 4-Hydroxy-L-proline                     | 0.715               | 0.180               | 5.497               | 1.170               | 0.626               | 0.015               | 16.425               | 14.453               | 0.444               | 0.194               | FAIL               | 10.560               | 427               |
| $\alpha,\alpha$ -Trehalose              | 0.786               | 0.109               | 8.903               | 2.236               | 0.727               | 0.116               | 6.228                | 4.256                | 0.478               | 0.228               | PASS               | 10.610               | 428               |
| <b><u>L-Glutamine</u></b>               | <b><u>0.765</u></b> | <b><u>0.130</u></b> | <b><u>6.121</u></b> | <b><u>0.546</u></b> | <b><u>0.666</u></b> | <b><u>0.055</u></b> | <b><u>13.035</u></b> | <b><u>11.063</u></b> | <b><u>0.500</u></b> | <b><u>0.250</u></b> | <b><u>FAIL</u></b> | <b><u>10.680</u></b> | <b><u>429</u></b> |
| <b><u>Glycine</u></b>                   | <b><u>0.791</u></b> | <b><u>0.104</u></b> | <b><u>4.669</u></b> | <b><u>1.998</u></b> | <b><u>0.655</u></b> | <b><u>0.044</u></b> | <b><u>13.479</u></b> | <b><u>11.507</u></b> | <b><u>0.600</u></b> | <b><u>0.350</u></b> | <b><u>FAIL</u></b> | <b><u>10.689</u></b> | <b><u>430</u></b> |
| DL-Isoleucine                           | 0.781               | 0.114               | 6.171               | 0.496               | 0.688               | 0.077               | 15.767               | 13.795               | 0.333               | 0.083               | FAIL               | 10.719               | 431               |
| L-Asparagine                            | 0.769               | 0.126               | 5.469               | 1.198               | 0.642               | 0.031               | 13.992               | 12.020               | 0.556               | 0.306               | FAIL               | 10.755               | 432               |
| <b><u>L-Valine</u></b>                  | <b><u>0.882</u></b> | <b><u>0.013</u></b> | <b><u>5.354</u></b> | <b><u>1.313</u></b> | <b><u>0.674</u></b> | <b><u>0.063</u></b> | <b><u>15.588</u></b> | <b><u>13.616</u></b> | <b><u>0.375</u></b> | <b><u>0.125</u></b> | <b><u>FAIL</u></b> | <b><u>10.853</u></b> | <b><u>433</u></b> |
| Betaine                                 | 0.786               | 0.109               | 5.600               | 1.067               | 0.667               | 0.056               | 17.236               | 15.264               | 0.375               | 0.125               | FAIL               | 10.872               | 434               |
| D-Threonine                             | 0.792               | 0.103               | 5.745               | 0.922               | 0.712               | 0.101               | 14.099               | 12.127               | 0.500               | 0.250               | FAIL               | 10.997               | 435               |
| DL-Valine                               | 0.883               | 0.012               | 6.182               | 0.485               | 0.768               | 0.157               | 12.988               | 11.016               | 0.375               | 0.125               | FAIL               | 11.017               | 436               |
| L-Threonine                             | 0.886               | 0.009               | 5.343               | 1.324               | 0.681               | 0.070               | 13.917               | 11.945               | 0.500               | 0.250               | FAIL               | 11.032               | 437               |
| DL-Glutamic acid                        | 0.786               | 0.109               | 5.628               | 1.039               | 0.631               | 0.020               | 16.393               | 14.421               | 0.500               | 0.250               | FAIL               | 11.033               | 438               |
| L-Leucine                               | 0.846               | 0.049               | 6.609               | 0.058               | 0.800               | 0.189               | 13.205               | 11.233               | 0.333               | 0.083               | FAIL               | 11.040               | 439               |
| L- $\alpha$ -Leucine                    | 0.846               | 0.049               | 6.609               | 0.058               | 0.800               | 0.189               | 13.205               | 11.233               | 0.333               | 0.083               | FAIL               | 11.040               | 440               |
| $\beta$ -Alanine                        | 0.724               | 0.171               | 4.971               | 1.696               | 0.649               | 0.038               | 19.495               | 17.523               | 0.500               | 0.250               | FAIL               | 11.217               | 441               |
| <b><i>Glutamic acid</i></b>             | <b><i>0.803</i></b> | <b><i>0.092</i></b> | <b><i>5.828</i></b> | <b><i>0.839</i></b> | <b><i>0.681</i></b> | <b><i>0.070</i></b> | <b><i>15.757</i></b> | <b><i>13.785</i></b> | <b><i>0.500</i></b> | <b><i>0.250</i></b> | <b><i>FAIL</i></b> | <b><i>11.224</i></b> | <b><i>442</i></b> |
| 4-Aminobutanoic acid                    | 0.599               | 0.296               | 5.081               | 1.586               | 0.577               | 0.034               | 24.969               | 22.997               | 0.429               | 0.179               | FAIL               | 11.266               | 443               |
| DL-Leucine                              | 0.833               | 0.062               | 6.534               | 0.133               | 0.774               | 0.163               | 15.552               | 13.580               | 0.333               | 0.083               | FAIL               | 11.275               | 444               |
| Tramadol                                | 0.844               | 0.051               | 7.290               | 0.623               | 0.575               | 0.036               | 23.243               | 21.271               | 0.158               | 0.092               | FAIL               | 11.521               | 445               |
| L-Cysteine                              | 0.996               | 0.101               | 5.768               | 0.899               | 0.849               | 0.238               | 12.986               | 11.014               | 0.429               | 0.179               | FAIL               | 11.731               | 446               |
| L-Cysteine                              | 0.996               | 0.101               | 5.768               | 0.899               | 0.849               | 0.238               | 12.986               | 11.014               | 0.429               | 0.179               | FAIL               | 11.731               | 447               |
| <b><u>L-Alanine</u></b>                 | <b><u>0.916</u></b> | <b><u>0.021</u></b> | <b><u>5.388</u></b> | <b><u>1.279</u></b> | <b><u>0.789</u></b> | <b><u>0.178</u></b> | <b><u>15.788</u></b> | <b><u>13.816</u></b> | <b><u>0.500</u></b> | <b><u>0.250</u></b> | <b><u>FAIL</u></b> | <b><u>11.851</u></b> | <b><u>448</u></b> |
| D-Alanine                               | 0.917               | 0.022               | 5.394               | 1.273               | 0.791               | 0.180               | 15.791               | 13.819               | 0.500               | 0.250               | FAIL               | 11.863               | 449               |
| DL-Serine                               | 0.951               | 0.056               | 5.729               | 0.938               | 0.844               | 0.233               | 14.628               | 12.656               | 0.571               | 0.321               | FAIL               | 12.315               | 450               |

Table S6 – COSMOQuick results for a multicomponent analysis of 450 co-formers against NVP molecule. Molecules are ordered by COSMO ranking position. In bold are represented the 76 molecules for which experimental multicomponent results are available. Black-italic letter identify the positive results; CSD means molecules reported in the CSD database. Red-underline letter identify the negative results.

| Co-former                                                    | Molecular formula       | $f_{\text{fit}}$     | $H_{\text{ex}}$ (kcal.mol <sup>-1</sup> ) | COSMO ranking    |
|--------------------------------------------------------------|-------------------------|----------------------|-------------------------------------------|------------------|
| [1,1'-Binaphthalene]-2,2'-diol                               | C20H14O2                | -4.436               | -6.477                                    | 1                |
| Trifluoroacetic acid                                         | C2HF3O2                 | -3.951               | -4.971                                    | 2                |
| <b><u>Phloroglucinol</u></b>                                 | <b><u>C6H6O3</u></b>    | <b><u>-3.654</u></b> | <b><u>-5.695</u></b>                      | <b><u>3</u></b>  |
| <b><i>Oxalic acid</i></b>                                    | <b><i>C2H2O4</i></b>    | <b><i>-3.469</i></b> | <b><i>-5.509</i></b>                      | <b><i>4</i></b>  |
| <b><u>Resorcinol</u></b>                                     | <b><u>C6H6O2</u></b>    | <b><u>-3.215</u></b> | <b><u>-4.745</u></b>                      | <b><u>5</u></b>  |
| Myricetin                                                    | C15H10O8                | -3.176               | -7.258                                    | 6                |
| 2,8,16,20-Tetramethylcalix(4)resorcinarene                   | C32H32O8                | -3.163               | -7.755                                    | 7                |
| Chloranilic acid                                             | C6H2Cl2O4               | -3.084               | -4.615                                    | 8                |
| <b><u>Catechol</u></b>                                       | <b><u>C6H6O2</u></b>    | <b><u>-3.049</u></b> | <b><u>-4.579</u></b>                      | <b><u>9</u></b>  |
| <b><i>Trichloroacetic acid</i></b> <sup>CSD</sup>            | <b><i>C2HCl3O2</i></b>  | <b><i>-2.918</i></b> | <b><i>-3.938</i></b>                      | <b><i>10</i></b> |
| 1,2-Ethanedisulfonic acid                                    | C2H6O6S2                | -2.853               | -5.914                                    | 11               |
| <b><u>Orcinol</u></b>                                        | <b><u>C7H8O2</u></b>    | <b><u>-2.806</u></b> | <b><u>-4.336</u></b>                      | <b><u>12</u></b> |
| 1-Naphthol                                                   | C10H8O                  | -2.741               | -3.762                                    | 13               |
| [1,1'-Biphenyl]-4,4'-diol                                    | C12H10O2                | -2.688               | -4.728                                    | 14               |
| 2,4-Dihydroxybenzoic acid                                    | C7H6O4                  | -2.421               | -4.972                                    | 15               |
| <b><i>Gallic acid</i></b>                                    | <b><i>C7H6O5</i></b>    | <b><i>-2.402</i></b> | <b><i>-5.463</i></b>                      | <b><i>16</i></b> |
| <b><u>Hydroquinone</u></b>                                   | <b><u>C6H6O2</u></b>    | <b><u>-2.288</u></b> | <b><u>-3.819</u></b>                      | <b><u>17</u></b> |
| 4-Nitrophenol                                                | C6H5NO3                 | -2.268               | -3.799                                    | 18               |
| o-Cresol                                                     | C7H8O                   | -2.097               | -3.117                                    | 19               |
| <b><i>Gentisic acid</i></b> <sup>CSD</sup>                   | <b><i>C7H6O4</i></b>    | <b><i>-1.985</i></b> | <b><i>-4.536</i></b>                      | <b><i>20</i></b> |
| 2,5-Dimethylphenol                                           | C8H10O                  | -1.871               | -2.891                                    | 21               |
| <b><i>3,5-Dinitrosalicylic acid</i></b> <sup>CSD</sup>       | <b><i>C7H4N2O7</i></b>  | <b><i>-1.861</i></b> | <b><i>-4.922</i></b>                      | <b><i>22</i></b> |
| Phenol                                                       | C6H6O                   | -1.853               | -2.873                                    | 23               |
| 1,1-bis(4-Hydroxyphenyl)cyclohexane                          | C18H20O2                | -1.665               | -4.216                                    | 24               |
| 2-Isopropyl-5-methylphenol                                   | C10H14O                 | -1.521               | -3.052                                    | 25               |
| <b><i>Naphthalene-1,5-disulfonic acid</i></b> <sup>CSD</sup> | <b><i>C10H8S2O6</i></b> | <b><i>-1.381</i></b> | <b><i>-3.932</i></b>                      | <b><i>26</i></b> |
| 1-Hydroxy-2-naphthoic acid                                   | C11H8O3                 | -1.373               | -3.414                                    | 27               |
| 2-(Tert-butyl)-4-methoxyphenol                               | C11H16O2                | -1.349               | -2.879                                    | 28               |
| <b><i>3-Hydroxybenzoic acid</i></b> <sup>CSD</sup>           | <b><i>C7H6O3</i></b>    | <b><i>-1.271</i></b> | <b><i>-3.311</i></b>                      | <b><i>29</i></b> |
| <b><i>Salicylic acid</i></b> <sup>CSD</sup>                  | <b><i>C7H6O3</i></b>    | <b><i>-1.170</i></b> | <b><i>-3.211</i></b>                      | <b><i>30</i></b> |
| 1-Naphthalenesulfonic acid                                   | C10H8O3S                | -1.166               | -2.697                                    | 31               |
| <b><i>4-Hydroxybenzoic acid</i></b> <sup>CSD</sup>           | <b><i>C7H6O3</i></b>    | <b><i>-0.868</i></b> | <b><i>-2.909</i></b>                      | <b><i>32</i></b> |
| Formic acid                                                  | CH2O2                   | -0.864               | -1.885                                    | 33               |
| 2,4,6-Trimethylphenol                                        | C9H12O                  | -0.820               | -1.841                                    | 34               |
| cis-Aconitic acid                                            | C6H6O6                  | -0.762               | -4.843                                    | 35               |
| 2,2,2-Trifluoroethanol                                       | C2H3F3O                 | -0.755               | -1.775                                    | 36               |
| 4-Methylbenzenesulfonic acid                                 | C7H8O3S                 | -0.748               | -2.278                                    | 37               |
| 3,5-Dinitrobenzoic acid                                      | C7H4N2O6                | -0.738               | -3.289                                    | 38               |
| 5-Nitroisophthalic acid                                      | C8H5NO6                 | -0.727               | -3.788                                    | 39               |
| <b><i>Fumaric acid</i></b>                                   | <b><i>C4H4O4</i></b>    | <b><i>-0.707</i></b> | <b><i>-3.258</i></b>                      | <b><i>40</i></b> |
| 2-Chloroacetic acid                                          | C2H3ClO2                | -0.639               | -2.169                                    | 41               |
| <b><i>Maleic Acid</i></b> <sup>CSD</sup>                     | <b><i>C4H4O4</i></b>    | <b><i>-0.568</i></b> | <b><i>-3.119</i></b>                      | <b><i>42</i></b> |

|                                                             |                        |                      |                      |                  |
|-------------------------------------------------------------|------------------------|----------------------|----------------------|------------------|
| Trimesic acid                                               | C9H6O6                 | -0.567               | -4.139               | 43               |
| 4-Nitrobenzoic acid                                         | C7H5NO4                | -0.500               | -2.541               | 44               |
| Trimethylamine oxide                                        | C3H9NO                 | -0.473               | -1.493               | 45               |
| Terephthalic acid                                           | C8H6O4                 | -0.423               | -2.974               | 46               |
| <b><i>L-Mandelic acid</i></b>                               | <b><i>C8H8O3</i></b>   | <b><i>-0.361</i></b> | <b><i>-2.912</i></b> | <b><i>47</i></b> |
| 4-Hydroxybenzaldehyde                                       | C7H6O2                 | -0.279               | -1.810               | 48               |
| Pyruvic acid                                                | C3H4O3                 | -0.237               | -1.768               | 49               |
| Anthranilic acid                                            | C7H7NO2                | -0.174               | -2.215               | 50               |
| 2,4-Pyridinedicarboxylic acid                               | C7H5NO4                | -0.148               | -2.699               | 51               |
| Acetic acid                                                 | C2H4O2                 | -0.111               | -1.132               | 52               |
| 2-Amino-5-methylbenzoic acid                                | C8H9NO2                | -0.096               | -2.137               | 53               |
| <b><u>Orotic acid</u></b>                                   | <b><u>C5H4N2O4</u></b> | <b><u>-0.071</u></b> | <b><u>-1.602</u></b> | <b><u>54</u></b> |
| 2,6-Di-tert-butyl-4-methylphenol                            | C15H24O                | -0.052               | -1.072               | 55               |
| 4-Ethoxyphenol                                              | C8H10O2                | -0.027               | -2.068               | 56               |
| <b><i>Benzoic acid</i><sup>CSD</sup></b>                    | <b><i>C7H6O2</i></b>   | <b><i>-0.019</i></b> | <b><i>-1.549</i></b> | <b><i>57</i></b> |
| 2-Coumaric acid                                             | C9H8O3                 | 0.013                | -2.538               | 58               |
| 1,7,7-Trimethyltricyclo(2.2.1.0 <sup>2,6</sup> )heptan-4-ol | C10H16O                | 0.106                | -0.914               | 59               |
| 1,4-Diazabicyclo[2.2.2]octane                               | C6H12N2                | 0.134                | -0.886               | 60               |
| Cyclamic acid                                               | C6H13NO3S              | 0.189                | -1.851               | 61               |
| Betaine                                                     | C5H10NO2               | 0.192                | -0.828               | 62               |
| Lactic acid                                                 | C3H6O3                 | 0.216                | -1.825               | 63               |
| <b><u>Glycolic acid</u></b>                                 | <b><u>C2H4O3</u></b>   | <b><u>0.234</u></b>  | <b><u>-1.807</u></b> | <b><u>64</u></b> |
| 4'-Hydroxyacetophenone                                      | C8H8O2                 | 0.236                | -1.295               | 65               |
| S(+)-Camphor-10-sulfonic acid                               | C10H16O4S              | 0.250                | -1.791               | 66               |
| (+)-Camphoric acid                                          | C10H16O4               | 0.260                | -2.291               | 67               |
| Vanillic acid                                               | C8H8O4                 | 0.265                | -2.286               | 68               |
| <b><i>Picric acid</i><sup>CSD</sup></b>                     | <b><i>C6H3N3O7</i></b> | <b><i>0.276</i></b>  | <b><i>-2.275</i></b> | <b><i>69</i></b> |
| $\alpha$ -Ketoglutaric acid                                 | C5H6O5                 | 0.279                | -3.292               | 70               |
| <b><i>Saccharin</i><sup>CSD</sup></b>                       | <b><i>C7H5NO3S</i></b> | <b><i>0.286</i></b>  | <b><i>-0.734</i></b> | <b><i>71</i></b> |
| <b><i>Tartaric acid</i><sup>CSD</sup></b>                   | <b><i>C4H6O6</i></b>   | <b><i>0.334</i></b>  | <b><i>-3.747</i></b> | <b><i>72</i></b> |
| <b><u>L-Tartaric acid</u></b>                               | <b><u>C4H6O6</u></b>   | <b><u>0.334</u></b>  | <b><u>-3.747</u></b> | <b><u>73</u></b> |
| Meso-Tartaric acid                                          | C4H6O6                 | 0.334                | -3.747               | 74               |
| <b><u>L-Malic acid</u></b>                                  | <b><u>C4H6O5</u></b>   | <b><u>0.388</u></b>  | <b><u>-3.183</u></b> | <b><u>75</u></b> |
| <b><u>DL-Malic acid</u></b>                                 | <b><u>C4H6O5</u></b>   | <b><u>0.388</u></b>  | <b><u>-3.183</u></b> | <b><u>76</u></b> |
| 1,10-Phenanthroline                                         | C12H8N2                | 0.412                | -0.609               | 77               |
| 2-Phenylacetic acid                                         | C8H8O2                 | 0.417                | -1.624               | 78               |
| Pterostilbene                                               | C16H16O3               | 0.435                | -2.626               | 79               |
| 4-(Hydroxymethyl)-2-methoxyphenol                           | C8H10O3                | 0.439                | -2.112               | 80               |
| (2R,3R)-2,3-Dimethylcyclopropane-1-carboxylic acid          | C6H10O2                | 0.451                | -1.079               | 81               |
| 4-(Hydroxymethyl)phenol                                     | C7H8O2                 | 0.474                | -1.567               | 82               |
| Hexamethylenetetramine                                      | C6H12N4                | 0.479                | -0.541               | 83               |
| Methyl paraben                                              | C8H8O3                 | 0.480                | -1.561               | 84               |
| Chloroform                                                  | CHCl3                  | 0.481                | -0.539               | 85               |
| 3-Oxocyclobutanecarboxylic acid                             | C5H6O3                 | 0.487                | -1.043               | 86               |
| Crotonic acid                                               | C4H6O2                 | 0.495                | -1.035               | 87               |
| <b><u>L-Ascorbic acid</u></b>                               | <b><u>C6H8O6</u></b>   | <b><u>0.546</u></b>  | <b><u>-3.026</u></b> | <b><u>88</u></b> |

|                                                                                |                       |                     |                      |                   |
|--------------------------------------------------------------------------------|-----------------------|---------------------|----------------------|-------------------|
| N,N-Dimethylacetamide                                                          | C4H9NO                | 0.560               | -0.460               | 89                |
| Dimethylsulfoxide                                                              | C2H6OS                | 0.572               | -0.448               | 90                |
| N-Methylpyrrolidone                                                            | C5H9NO                | 0.595               | -0.426               | 91                |
| 3-Methylbut-2-enoic acid                                                       | C5H8O2                | 0.597               | -0.934               | 92                |
| Pyrrrole                                                                       | C4H5N                 | 0.608               | -0.412               | 93                |
| <b><u>Succinic acid</u></b>                                                    | <b><u>C4H6O4</u></b>  | <b><u>0.617</u></b> | <b><u>-2.444</u></b> | <b><u>94</u></b>  |
| Tetramethylpyrazine                                                            | C8H12N2               | 0.625               | -0.396               | 95                |
| 2,2'-Dihydroxy-5,5'-diallyl-biphenyl                                           | C18H18O2              | 0.636               | -3.446               | 96                |
| <b><i>4-Aminobenzoic acid</i></b>                                              | <b><i>C7H7NO2</i></b> | <b><i>0.680</i></b> | <b><i>-1.361</i></b> | <b><i>97</i></b>  |
| <b><i>Dichloromethane<sup>CSD</sup></i></b>                                    | <b><i>CH2Cl2</i></b>  | <b><i>0.683</i></b> | <b><i>-0.337</i></b> | <b><i>98</i></b>  |
| 2-Amino-5-picolinic acid                                                       | C6H6N2O2              | 0.690               | -1.351               | 99                |
| <b><u>Nicotinic acid</u></b>                                                   | <b><u>C6H5NO2</u></b> | <b><u>0.690</u></b> | <b><u>-0.840</u></b> | <b><u>100</u></b> |
| Allocinnamic acid                                                              | C9H8O2                | 0.691               | -1.349               | 101               |
| 2,4-Dimethylpyridine                                                           | C7H9N                 | 0.693               | -0.328               | 102               |
| Oxetane                                                                        | C3H6O                 | 0.701               | -0.319               | 103               |
| 1,4-Dimethylpiperazine                                                         | C6H14N2               | 0.715               | -0.306               | 104               |
| N,N-Dimethylformamide                                                          | C3H7NO                | 0.723               | -0.297               | 105               |
| 1-Amino-1-methylcyclopropane                                                   | C4H9N                 | 0.727               | -0.293               | 106               |
| Ethylamine                                                                     | C2H7N                 | 0.744               | -0.277               | 107               |
| cis,cis-1,3,5-Cyclohexanetricarboxylic acid                                    | C9H12O6               | 0.748               | -2.824               | 108               |
| 2,6-Dimethylpyridine                                                           | C7H9N                 | 0.762               | -0.258               | 109               |
| 2,5,5,8 $\alpha$ -Tetramethyloctahydro-2H-2,4 $\alpha$ -methanonaphthalen-1-ol | C15H26O               | 0.763               | -0.257               | 110               |
| 2,3-Dimethylpyrazine                                                           | C6H8N2                | 0.771               | -0.250               | 111               |
| 4-Methoxybenzoic acid                                                          | C8H8O3                | 0.773               | -1.267               | 112               |
| 2,6-Dimethylpyrazine                                                           | C6H8N2                | 0.777               | -0.243               | 113               |
| 2,5-Dimethylpyrazine                                                           | C6H8N2                | 0.780               | -0.241               | 114               |
| 4,4'-Bipyridine                                                                | C10H8N2               | 0.801               | -0.219               | 115               |
| Cyclobutanol                                                                   | C4H8O                 | 0.802               | -0.219               | 116               |
| Pyridine                                                                       | C5H5N                 | 0.807               | -0.213               | 117               |
| Methanol                                                                       | CH4O                  | 0.810               | -0.210               | 118               |
| (R,S)-Hesperetin                                                               | C16H14O6              | 0.817               | -2.244               | 119               |
| Tetrahydrofuran                                                                | C4H8O                 | 0.819               | -0.201               | 120               |
| Tetrathiafulvalene                                                             | C6H4S4                | 0.819               | -0.201               | 121               |
| 4-Methylmorpholine                                                             | C5H11NO               | 0.855               | -0.165               | 122               |
| Ethylenediamine                                                                | C2H8N2                | 0.857               | -0.673               | 123               |
| Phenoxyacetic acid                                                             | C8H8O3                | 0.860               | -1.691               | 124               |
| Trimethylamine                                                                 | C3H9N                 | 0.865               | -0.156               | 125               |
| <b><i><math>\epsilon</math>-Caprolactam<sup>CSD</sup></i></b>                  | <b><i>C6H11NO</i></b> | <b><i>0.870</i></b> | <b><i>-0.150</i></b> | <b><i>126</i></b> |
| Pyromellitic                                                                   | C10H2O6               | 0.872               | -0.148               | 127               |
| Tetraiodoethene                                                                | C2I4                  | 0.897               | -0.123               | 128               |
| 2,2-Dibromo-2-cyanoacetamide                                                   | C3H2Br2N2O            | 0.900               | -0.631               | 129               |
| Butyric acid                                                                   | C4H8O2                | 0.910               | -1.131               | 130               |
| Phenylmethanol                                                                 | C7H8O                 | 0.912               | -0.619               | 131               |
| Acridine                                                                       | C13H9N                | 0.912               | -0.108               | 132               |
| <b><i>Malonic acid</i></b>                                                     | <b><i>C3H4O4</i></b>  | <b><i>0.914</i></b> | <b><i>-1.637</i></b> | <b><i>133</i></b> |
| <b><i>Ethanol<sup>CSD</sup></i></b>                                            | <b><i>C2H5OH</i></b>  | <b><i>0.914</i></b> | <b><i>-0.106</i></b> | <b><i>134</i></b> |

|                                               |                         |                     |                      |                   |
|-----------------------------------------------|-------------------------|---------------------|----------------------|-------------------|
| 2-Acetylpyrrole                               | C6H7NO                  | 0.915               | -0.105               | 135               |
| Morpholine                                    | C4H9NO                  | 0.929               | -0.091               | 136               |
| <b><u>Acetylsalicylic acid</u></b>            | <b><u>C9H8O4</u></b>    | <b><u>0.936</u></b> | <b><u>-1.615</u></b> | <b><u>137</u></b> |
| Isocaryolan-9 $\alpha$ -ol                    | C15H26O                 | 0.936               | -0.084               | 138               |
| <b><u>Vanillin</u></b>                        | <b><u>C8H8O3</u></b>    | <b><u>0.937</u></b> | <b><u>-1.104</u></b> | <b><u>139</u></b> |
| <b><u>Pyroglutamic acid</u></b>               | <b><u>C5H7NO3</u></b>   | <b><u>0.937</u></b> | <b><u>-0.593</u></b> | <b><u>140</u></b> |
| 2-Aminopyrimidine                             | C4H5N3                  | 0.938               | -0.083               | 141               |
| Piperidine                                    | C5H11N                  | 0.939               | -0.081               | 142               |
| 2-Methylpropan-2-ol                           | C4H10O                  | 0.940               | -0.080               | 143               |
| 2,6-Pyridinedicarboxylic acid                 | C7H5NO4                 | 0.941               | -1.610               | 144               |
| 1,4,8,11-Tetra-azacyclotetradecane            | C10H24N4                | 0.941               | -0.079               | 145               |
| Thiourea                                      | CH4N2S                  | 0.947               | -0.584               | 146               |
| <b><i>Theophylline</i></b>                    | <b><i>C7H8N4O2</i></b>  | <b><i>0.948</i></b> | <b><i>-0.072</i></b> | <b><i>147</i></b> |
| Pyrazine                                      | C4H4N2                  | 0.955               | -0.066               | 148               |
| Cyclohexanone                                 | C6H10O                  | 0.958               | -0.062               | 149               |
| <b><i>1,4-Dioxane</i><sup>CSD</sup></b>       | <b><i>C4H8O2</i></b>    | <b><i>0.960</i></b> | <b><i>-0.060</i></b> | <b><i>150</i></b> |
| Phenazine                                     | C12H8N2                 | 0.961               | -0.059               | 151               |
| Furfural                                      | C6H12O2                 | 0.969               | -0.051               | 152               |
| Nootkatone                                    | C15H22O                 | 0.969               | -0.051               | 153               |
| Salicylaldehyde                               | C7H6O2                  | 0.970               | -0.561               | 154               |
| <b><i>Caffeine</i></b>                        | <b><i>C8H10N4O2</i></b> | <b><i>0.971</i></b> | <b><i>-0.050</i></b> | <b><i>155</i></b> |
| <b><i>1,3-Diiodobenzene</i><sup>CSD</sup></b> | <b><i>C6H4I2</i></b>    | <b><i>0.971</i></b> | <b><i>-0.050</i></b> | <b><i>156</i></b> |
| 1-Hydroxydiamantane                           | C14H20O                 | 0.974               | -0.047               | 157               |
| Propan-2-one                                  | C3H6O                   | 0.983               | -0.038               | 158               |
| 5,5-Diethylbarbituric acid                    | C8H12N2O3               | 0.996               | -0.534               | 159               |
| <b><u>Piperazine</u></b>                      | <b><u>C4H10N2</u></b>   | <b><u>0.998</u></b> | <b><u>-0.022</u></b> | <b><u>160</u></b> |
| 1,2-Dichloroethane                            | C2H4Cl2                 | 1.011               | -0.010               | 161               |
| Methyl acetate                                | C3H6O2                  | 1.020               | 0.000                | 162               |
| Ethylene oxide                                | C2H4O                   | 1.030               | 0.010                | 163               |
| <b><i>Uracil</i></b>                          | <b><i>C4H4N2O2</i></b>  | <b><i>1.031</i></b> | <b><i>0.010</i></b>  | <b><i>164</i></b> |
| 4-Benzoquinone                                | C6H4O2                  | 1.034               | 0.013                | 165               |
| 2,2'-Bipyridine                               | C10H8N2                 | 1.034               | 0.014                | 166               |
| 3,4-(Methylenedioxy)benzaldehyde              | C8H6O3                  | 1.035               | 0.014                | 167               |
| <b><u>Theobromine</u></b>                     | <b><u>C7H8N4O2</u></b>  | <b><u>1.041</u></b> | <b><u>0.020</u></b>  | <b><u>168</u></b> |
| 1,1-Dihydroxypropan-2-one                     | C3H6O3                  | 1.045               | -0.996               | 169               |
| Imidazole                                     | C3H4N2                  | 1.050               | 0.030                | 170               |
| Cyclodecanol                                  | C10H20O                 | 1.054               | 0.034                | 171               |
| Quinoxaline-N,N'-dioxide                      | C8H6N2O2                | 1.056               | 0.036                | 172               |
| Coumarin                                      | C9H6O2                  | 1.066               | 0.046                | 173               |
| Acrylaldehyde                                 | C3H4O                   | 1.071               | 0.051                | 174               |
| <b><i>Cinnamic acid</i></b>                   | <b><i>C9H8O2</i></b>    | <b><i>1.076</i></b> | <b><i>-0.965</i></b> | <b><i>175</i></b> |
| 2-Pyridone                                    | C5H5NO                  | 1.091               | 0.071                | 176               |
| Acetophenone                                  | C8H8O                   | 1.094               | 0.073                | 177               |
| Eucalyptol                                    | C10H18O                 | 1.094               | 0.074                | 178               |
| Chloro(methoxy)methane                        | C2H5ClO                 | 1.095               | 0.074                | 179               |
| Cycloundecanone                               | C11H20O                 | 1.100               | 0.079                | 180               |

|                                                                                                                                |               |              |               |            |
|--------------------------------------------------------------------------------------------------------------------------------|---------------|--------------|---------------|------------|
| Formaldehyde                                                                                                                   | CH2O          | 1.100        | 0.080         | 181        |
| Methyl cubane-1-carboxylate                                                                                                    | C10H10O2      | 1.100        | 0.080         | 182        |
| Pyrazine-1,4-dioxide                                                                                                           | C4H4N2O2      | 1.108        | 0.087         | 183        |
| Phthalide                                                                                                                      | C8H6O2        | 1.109        | 0.089         | 184        |
| 3-Isochromanone                                                                                                                | C9H8O2        | 1.111        | 0.091         | 185        |
| 1-(Naphthalen-2-yl)Ethan-1-One                                                                                                 | C12H10O       | 1.114        | 0.093         | 186        |
| <b>Sorbic acid</b>                                                                                                             | <b>C6H8O2</b> | <b>1.115</b> | <b>-0.925</b> | <b>187</b> |
| 3S-cis-3,6-Dimethyl-1,4-dioxane-2,5-dione                                                                                      | C6H8O4        | 1.118        | 0.098         | 188        |
| 2,3-Butanedione                                                                                                                | C4H6O2        | 1.120        | 0.100         | 189        |
| 4,4,7-Trimethyldecahydro-1H-cyclopenta[cd]inden-7-ol                                                                           | C14H24O       | 1.132        | 0.111         | 190        |
| 1,2-Dimethyldisulfane                                                                                                          | C2H6S2        | 1.137        | 0.117         | 191        |
| Adamantane-1,3,5,7-tetracarboxylic acid                                                                                        | C14H16O8      | 1.138        | -2.944        | 192        |
| 2-Methoxynaphthalene                                                                                                           | C11H10O       | 1.144        | 0.123         | 193        |
| Acetamide                                                                                                                      | C2H5NO        | 1.145        | 0.125         | 194        |
| Dimethylsulfide                                                                                                                | C2H6S         | 1.149        | 0.129         | 195        |
| (4R,7S)-7-Isopropyl-4-methyloxepan-2-one                                                                                       | C10H18O2      | 1.150        | 0.129         | 196        |
| cis-anti-cis-Dicyclohexano-18-crown-6                                                                                          | C20H36O6      | 1.152        | 0.131         | 197        |
| 3 $\alpha$ ,4,7,7-Tetramethyl-(3 $\alpha$ R,4S,6 $\alpha$ R,10 $\alpha$ S)-perhydronaphtho(8 $\alpha$ ,1- $\beta$ )furan-2-one | C16H26O2      | 1.160        | 0.139         | 198        |
| (3 $\alpha$ R,4R,6 $\alpha$ S,10 $\alpha$ S)-3 $\alpha$ ,4,7,7-Tetramethylperhydronaphtho(8 $\alpha$ ,1- $\beta$ )furan-2-one  | C16H26O2      | 1.160        | 0.139         | 199        |
| (3 $\alpha$ R,4S,6 $\alpha$ S,10 $\alpha$ S)-3 $\alpha$ ,4,7,7-Tetramethylperhydronaphtho(8 $\alpha$ ,1- $\beta$ )furan-2-one  | C16H26O2      | 1.160        | 0.139         | 200        |
| Nitromethane                                                                                                                   | CH3NO2        | 1.163        | 0.143         | 201        |
| Cyclodecanone                                                                                                                  | C10H18O       | 1.164        | 0.143         | 202        |
| 2,5-Piperazinedione                                                                                                            | C4H6N2O2      | 1.173        | 0.153         | 203        |
| (1R,2R)-Cyclohexane-1,2-Diamine                                                                                                | C6H14N2       | 1.183        | -0.348        | 204        |
| Ethyl(methyl)sulfane                                                                                                           | C3H8S         | 1.185        | 0.164         | 205        |
| (-)-1,3,3-Trimethyl-2-norbornanone                                                                                             | C10H16O       | 1.185        | 0.165         | 206        |
| (-)-Epicedrol                                                                                                                  | C15H26O       | 1.189        | 0.169         | 207        |
| 1,4-Dithiane                                                                                                                   | C4H8S2        | 1.190        | 0.169         | 208        |
| Formamide                                                                                                                      | CH3NO         | 1.190        | 0.170         | 209        |
| Cyclohexane-1,4-diamine                                                                                                        | C6H14N2       | 1.208        | -0.323        | 210        |
| L-Carvone                                                                                                                      | C10H14O       | 1.230        | 0.209         | 211        |
| <b>Toluene<sup>CSD</sup></b>                                                                                                   | <b>C7H8</b>   | <b>1.230</b> | <b>0.210</b>  | <b>212</b> |
| 2,3,5,6-Tetrachlorocyclohexa-2,5-diene-1,4-dione                                                                               | C6Cl4O2       | 1.234        | 0.214         | 213        |
| 2-Ethyl-3-hydroxy-4H-pyran-4-one                                                                                               | C7H8O3        | 1.245        | -0.286        | 214        |
| Dihydrofuran-2,5-dione                                                                                                         | C4H4O3        | 1.255        | 0.234         | 215        |
| Caryophyllen- $\alpha$ -oxide                                                                                                  | C15H24O       | 1.265        | 0.244         | 216        |
| Propan-1-amine                                                                                                                 | C3H9N         | 1.268        | -0.263        | 217        |
| (E)-4,4'-Diazastilbene                                                                                                         | C12H10N2      | 1.285        | -0.246        | 218        |
| 4,4'-Ethene-1,2-diylpyridine                                                                                                   | C12H10N2      | 1.285        | -0.246        | 219        |
| Chlorine                                                                                                                       | Cl2           | 1.289        | 0.268         | 220        |
| 4-Acetamidobenzoic acid                                                                                                        | C9H9NO3       | 1.334        | -1.217        | 221        |
| 1,4-Phenylenediamine                                                                                                           | C6H8N2        | 1.361        | -0.170        | 222        |
| (1S,6R,10R)-(+)-6-Methyl-4-oxabicyclo(8.4.1)pentadecan-3-one                                                                   | C15H26O2      | 1.373        | 0.353         | 223        |
| 1,1,6,6-Tetraphenylhexa-2,4-diyne-1,6-diol                                                                                     | C30H22O2      | 1.380        | -2.191        | 224        |
| 1,2,4,5-Tetracyanobenzene                                                                                                      | C10H2N4       | 1.390        | 0.369         | 225        |
| Ibuprofen                                                                                                                      | C13H18O2      | 1.410        | -1.651        | 226        |



|                                                             |                 |              |               |            |
|-------------------------------------------------------------|-----------------|--------------|---------------|------------|
| Proline                                                     | C5H9NO2         | 1.411        | -0.119        | 227        |
| <b>L-Proline</b>                                            | <b>C5H9NO2</b>  | <b>1.411</b> | <b>-0.119</b> | <b>228</b> |
| <b>Citric acid</b>                                          | <b>C6H8O7</b>   | <b>1.427</b> | <b>-3.675</b> | <b>229</b> |
| 2,2'-(cyclohexa-2,5-diene-1,4-diylidene)dimalononitrile     | C12H4N4         | 1.428        | 0.408         | 230        |
| Butan-2-ol                                                  | C4H10O          | 1.433        | -0.097        | 231        |
| D-Threonine                                                 | C4H9NO3         | 1.452        | -1.610        | 232        |
| L-Threonine                                                 | C4H9NO3         | 1.452        | -1.610        | 233        |
| 1-Hydroxypropan-2-one                                       | C3H6O2          | 1.453        | -0.078        | 234        |
| (5-Hydroxy-6-methylpyridine-3,4-diyl)dimethanol             | C8H11NO3        | 1.467        | -1.594        | 235        |
| <b>Urea</b>                                                 | <b>CH4N2O</b>   | <b>1.477</b> | <b>-0.054</b> | <b>236</b> |
| Ethylene glycol                                             | C2H6O2          | 1.480        | -0.560        | 237        |
| <b>L-Aspartic acid</b>                                      | <b>C4H7NO4</b>  | <b>1.490</b> | <b>-2.081</b> | <b>238</b> |
| <b>DL-Aspartic acid</b>                                     | <b>C4H7NO4</b>  | <b>1.490</b> | <b>-2.081</b> | <b>239</b> |
| 2,5-bis(4-Pyridyl)-1,3,4-oxadiazole                         | C12H8N4O        | 1.491        | -0.040        | 240        |
| Phenylmethanethiol                                          | C7H8S           | 1.495        | -0.036        | 241        |
| Dichlorodifluoromethane                                     | CCl2F2          | 1.498        | 0.478         | 242        |
| <b>Benzamide</b>                                            | <b>C7H7NO</b>   | <b>1.518</b> | <b>-0.013</b> | <b>243</b> |
| Carbamazepine                                               | C15H12N2O       | 1.520        | -0.010        | 244        |
| 4-(4-Hydroxyphenyl)butan-2-one                              | C10H12O2        | 1.522        | -1.029        | 245        |
| <b>Ethyl acetate<sup>CSD</sup></b>                          | <b>C4H8O2</b>   | <b>1.523</b> | <b>-0.007</b> | <b>246</b> |
| $\beta$ -L-Lyxopyranose                                     | C5H10O5         | 1.524        | -1.027        | 247        |
| $\alpha$ -L-Xylopyranose                                    | C5H10O5         | 1.524        | -1.027        | 248        |
| <b>1,2,4,5-Tetrafluoro-3,6-di-iodobenzene<sup>CSD</sup></b> | <b>C6F4I2</b>   | <b>1.525</b> | <b>0.505</b>  | <b>249</b> |
| Levulinic acid                                              | C5H8O3          | 1.526        | -1.025        | 250        |
| Tryphenylphosphine oxide                                    | C18H15OP        | 1.547        | -0.494        | 251        |
| $\beta$ -DL-Arabinose                                       | C5H10O5         | 1.569        | -1.492        | 252        |
| (1R,2S)-2-Methyl-4-oxocyclohexane-1-carboxylic acid         | C8H12O3         | 1.581        | 0.050         | 253        |
| Benzalacetone                                               | C10H10O         | 1.586        | 0.056         | 254        |
| <b>Ferulic acid</b>                                         | <b>C10H10O4</b> | <b>1.595</b> | <b>-1.467</b> | <b>255</b> |
| Cinnamaldehyde                                              | C9H8O           | 1.602        | 0.071         | 256        |
| <b>Isonicotinamide</b>                                      | <b>C6H6N2O</b>  | <b>1.603</b> | <b>0.072</b>  | <b>257</b> |
| 1-(4-Methoxyphenyl)ethan-1-one                              | C9H10O2         | 1.604        | 0.073         | 258        |
| Terephthalaldehyde                                          | C8H6O2          | 1.608        | 0.078         | 259        |
| Melamine                                                    | C3H6N6          | 1.609        | -0.432        | 260        |
| Methyl benzoate                                             | C8H8O2          | 1.617        | 0.087         | 261        |
| 4-Hydroxy-3,5-dimethoxybenzaldehyde                         | C9H10O4         | 1.621        | -0.930        | 262        |
| 4-Methoxybenzaldehyde                                       | C8H8O2          | 1.625        | 0.094         | 263        |
| <b>Propionamide</b>                                         | <b>C3H7NO</b>   | <b>1.625</b> | <b>0.095</b>  | <b>264</b> |
| <b>Nicotinamide</b>                                         | <b>C6H6N2O</b>  | <b>1.626</b> | <b>0.096</b>  | <b>265</b> |
| Benzophenone                                                | C13H10O         | 1.639        | 0.108         | 266        |
| $\beta$ -D-Fructopyranose                                   | C6H12O6         | 1.639        | -1.933        | 267        |
| $\alpha$ -L-Sorbopyranose                                   | C6H12O6         | 1.639        | -1.933        | 268        |
| $\alpha$ -D-Tagatopyranose                                  | C5H6O3          | 1.639        | -1.933        | 269        |
| 1,2-Dimethoxybenzene                                        | C8H10O2         | 1.639        | 0.109         | 270        |
| Phenyl acetate                                              | C8H8O2          | 1.640        | 0.110         | 271        |
| bis(Methylthio)methane                                      | C3H8S2          | 1.647        | 0.116         | 272        |

|                                                      |                |              |               |            |
|------------------------------------------------------|----------------|--------------|---------------|------------|
| Tetracyanoethylene                                   | C6N4           | 1.664        | 0.644         | 273        |
| Diphenyl ether                                       | C12H10O        | 1.675        | 0.145         | 274        |
| 1,2-bis(4-Pyridyl)ethane                             | C12H10N2       | 1.687        | -0.354        | 275        |
| 4-Hydroxy-L-proline                                  | C5H9NO3        | 1.701        | -0.340        | 276        |
| 1,4-Dimethoxybenzene                                 | C8H10O2        | 1.704        | 0.173         | 277        |
| 4-Aminobenzamide                                     | C7H8N2O        | 1.781        | -0.260        | 278        |
| <b>Glutaric acid<sup>CSD</sup></b>                   | <b>C5H8O4</b>  | <b>1.783</b> | <b>-1.788</b> | <b>279</b> |
| Butan-1-amine                                        | C4H11N         | 1.804        | -0.237        | 280        |
| 1-Chloro-1,1,2,2,2-pentafluoroethane                 | C2ClF5         | 1.832        | 0.812         | 281        |
| Phenyl 2-Hydroxybenzoate                             | C13H10O3       | 1.855        | -0.696        | 282        |
| 1,2-Ethanedithiol                                    | C2H6S2         | 1.856        | -0.185        | 283        |
| (E)-4-(4-Hydroxy-3-methoxyphenyl)but-3-en-2-one      | C11H12O3       | 1.873        | -0.678        | 284        |
| o-Anisic acid                                        | C8H8O3         | 1.883        | -0.158        | 285        |
| Indomethacin                                         | C19H16ClNO4    | 1.931        | -1.640        | 286        |
| <b>Cinnamide</b>                                     | <b>C9H9NO</b>  | <b>1.939</b> | <b>-0.101</b> | <b>287</b> |
| D-Alanine                                            | C3H7NO2        | 1.945        | -0.096        | 288        |
| <b>L-Alanine</b>                                     | <b>C3H7NO2</b> | <b>1.945</b> | <b>-0.096</b> | <b>289</b> |
| Tetrabromomethane                                    | CBr4           | 1.950        | 0.930         | 290        |
| <b>n-Butanol<sup>CSD</sup></b>                       | <b>C4H10O</b>  | <b>1.961</b> | <b>-0.080</b> | <b>291</b> |
| Hexanoic acid                                        | C6H12O2        | 1.996        | -1.065        | 292        |
| <b>Glycine</b>                                       | <b>C2H5NO2</b> | <b>2.050</b> | <b>0.010</b>  | <b>293</b> |
| D-Glucono-1,5-lactone                                | C6H10O6        | 2.053        | -1.008        | 294        |
| Tricyclopropylamine                                  | C9H15N         | 2.060        | 0.019         | 295        |
| Ethyl Propionate                                     | C5H10O2        | 2.061        | 0.020         | 296        |
| Benzoin                                              | C14H12O2       | 2.062        | -0.489        | 297        |
| 1,3,5-Trinitrobenzene                                | C6H3N3O6       | 2.069        | 0.028         | 298        |
| 2,3,5,6-Tetrafluoro-7,7,8,8-tetracyanoquinodimethane | C12F4N4        | 2.075        | 1.054         | 299        |
| Pyrimethamine                                        | C12H13ClN4     | 2.085        | -0.466        | 300        |
| <b>Hippuric acid</b>                                 | <b>C9H9NO3</b> | <b>2.087</b> | <b>-0.975</b> | <b>301</b> |
| DL-Cysteine                                          | C3H7NO2S       | 2.091        | -0.970        | 302        |
| L-Cysteine                                           | C3H7NO2S       | 2.091        | -0.970        | 303        |
| L-Cysteine                                           | C3H7NO2S       | 2.091        | -0.970        | 304        |
| 1,3-Di(pyridin-4-yl)propane                          | C13H14N2       | 2.116        | -0.435        | 305        |
| 2-Hydroxyacetamide                                   | C2H5NO2        | 2.129        | 0.088         | 306        |
| (R)-2-Hydroxypropanamide                             | C3H7NO2        | 2.130        | 0.089         | 307        |
| (S)-2-Hydroxypropanamide                             | C3H7NO2        | 2.130        | 0.089         | 308        |
| 2-Aminoethan-1-ol                                    | C2H7NO         | 2.136        | 0.095         | 309        |
| Butyramide                                           | C4H9NO         | 2.140        | 0.100         | 310        |
| 1,2-Dicyclopropylethane-1,2-dione                    | C8H10O2        | 2.200        | 0.159         | 311        |
| 1,2-Diphenyldisulfane                                | C12H10S2       | 2.210        | 0.169         | 312        |
| 1,2-bis(Methylthio)ethane                            | C4H10S2        | 2.222        | 0.181         | 313        |
| $\alpha$ -D-Talose                                   | C6H12O6        | 2.232        | -1.340        | 314        |
| $\beta$ -D-Gulose                                    | C6H12O6        | 2.232        | -1.340        | 315        |
| $\beta$ -D-Allose                                    | C6H12O6        | 2.232        | -1.340        | 316        |
| $\beta$ -D-Altropyranose                             | C6H12O6        | 2.232        | -1.340        | 317        |
| $\alpha$ -D-Galactose                                | C6H12O6        | 2.232        | -1.340        | 318        |

|                                            |                        |                     |                      |                   |
|--------------------------------------------|------------------------|---------------------|----------------------|-------------------|
| β-D-Galactose                              | C6H12O6                | 2.232               | -1.340               | 319               |
| α-D-Glucose                                | C6H12O6                | 2.232               | -1.340               | 320               |
| β-D-Glucose                                | C6H12O6                | 2.232               | -1.340               | 321               |
| DL-Valine                                  | C5H11NO2               | 2.269               | -0.282               | 322               |
| <b><u>L-Valine</u></b>                     | <b><u>C5H11NO2</u></b> | <b><u>2.269</u></b> | <b><u>-0.282</u></b> | <b><u>323</u></b> |
| 4-tert-Butyl-3-methoxy-2,6-dinitrotoluene  | C12H16N2O5             | 2.285               | 0.244                | 324               |
| 3,3'-Thiodipropionic acid                  | C6H10O4S               | 2.332               | -2.260               | 325               |
| Pentan-1-amine                             | C5H13N                 | 2.345               | -0.206               | 326               |
| DL-Tyrosine                                | C9H11NO3               | 2.378               | -1.193               | 327               |
| L-Tyrosine                                 | C9H11NO3               | 2.378               | -1.193               | 328               |
| DL-Serine                                  | C3H7NO3                | 2.386               | -0.675               | 329               |
| <b><i>Adipic acid</i></b>                  | <b><i>C10H18</i></b>   | <b><i>2.418</i></b> | <b><i>-1.664</i></b> | <b><i>330</i></b> |
| DL-Tryptophan                              | C11H12N2O2             | 2.421               | -0.640               | 331               |
| L-Tryptophan                               | C11H12N2O2             | 2.421               | -0.640               | 332               |
| 1,3-Propanedithiol                         | C3H8S2                 | 2.438               | -0.113               | 333               |
| Piperine                                   | C17H19NO3              | 2.528               | -0.023               | 334               |
| 1-Pentanol                                 | C5H12O                 | 2.532               | -0.019               | 335               |
| Heptanoic acid                             | C7H14O2                | 2.534               | -1.037               | 336               |
| Scyllo-inositol                            | C6H12O6                | 2.551               | -1.020               | 337               |
| Cyclohexane-1,2,3,4,5,6-hexaol             | C6H12O6                | 2.551               | -1.020               | 338               |
| epi-Inositol                               | C6H12O6                | 2.551               | -1.020               | 339               |
| L-chiro-Inositol                           | C6H12O6                | 2.551               | -1.020               | 340               |
| myo-Inositol                               | C6H12O6                | 2.551               | -1.020               | 341               |
| cis-Inositol                               | C6H12O6                | 2.551               | -1.020               | 342               |
| D-(+)-chiro-Inositol                       | C6H12O6                | 2.551               | -1.020               | 343               |
| neo-Inositol                               | C6H12O6                | 2.551               | -1.020               | 344               |
| Muco-inositol                              | C6H12O6                | 2.551               | -1.020               | 345               |
| Cyclohexane-1,2,3,4,5,6-hexol              | C6H12O6                | 2.551               | -1.020               | 346               |
| Glycerol                                   | C3H8O3                 | 2.584               | -0.478               | 347               |
| n-Butyl acetate                            | C6H12O2                | 2.591               | 0.040                | 348               |
| β-D- Psicose                               | C6H12O6                | 2.627               | -1.454               | 349               |
| β-Alanine                                  | C3H7NO2                | 2.642               | 0.091                | 350               |
| D-Glucuronic acid                          | C6H10O7                | 2.674               | -2.939               | 351               |
| 1,3-Diphenylpropan-2-one                   | C15H14O                | 2.679               | 0.128                | 352               |
| 2-Methoxy-4-(1-(E)-propenyl)phenyl acetate | C12H14O3               | 2.716               | 0.165                | 353               |
| Diallylsulfide                             | C6H10S                 | 2.763               | 0.212                | 354               |
| DL-Leucine                                 | C6H13NO2               | 2.794               | -0.267               | 355               |
| L-α-Leucine                                | C6H13NO2               | 2.794               | -0.267               | 356               |
| L-Leucine                                  | C6H13NO2               | 2.794               | -0.267               | 357               |
| <b><u>Succinamide</u></b>                  | <b><u>C4H8N2O2</u></b> | <b><u>2.813</u></b> | <b><u>-0.248</u></b> | <b><u>358</u></b> |
| Hexan-1-amine                              | C6H15N                 | 2.878               | -0.183               | 359               |
| 4-Aminobutanoic acid                       | C4H9NO2                | 2.880               | -0.182               | 360               |
| D-Isoleucine                               | C6H13NO2               | 2.887               | -0.175               | 361               |
| DL-Isoleucine                              | C6H13NO2               | 2.887               | -0.175               | 362               |
| 13-epi-Sclareol                            | C20H36O2               | 2.957               | -0.614               | 363               |
| Octanoic acid                              | C8H16O2                | 3.053               | -1.029               | 364               |

|                                                                |                  |              |               |            |
|----------------------------------------------------------------|------------------|--------------|---------------|------------|
| <b>Hexanol<sup>CSD</sup></b>                                   | <b>C6H14O</b>    | <b>3.078</b> | <b>0.017</b>  | <b>365</b> |
| DL-Ribose                                                      | C5H10O5          | 3.083        | -1.509        | 366        |
| L-Ribose                                                       | C5H10O5          | 3.083        | -1.509        | 367        |
| 3 $\beta$ ,12 $\beta$ -Dihydroxy-5 $\beta$ -cholan-24-oic acid | C24H40O4         | 3.127        | -0.955        | 368        |
| iso-Deoxycholic acid                                           | C24H40O4         | 3.127        | -0.955        | 369        |
| Diallyldisulfide                                               | C6H10S2          | 3.146        | 0.084         | 370        |
| Dimethyl succinate                                             | C6H10O4          | 3.159        | 0.098         | 371        |
| Dibenzoyl peroxide                                             | C14H10O4         | 3.176        | 0.115         | 372        |
| (Z)-Ethyl 2-benzylidene-3-oxobutanoate                         | C13H14O3         | 3.185        | 0.123         | 373        |
| D-Asparagine                                                   | C4H8N2O3         | 3.189        | -0.383        | 374        |
| L-Asparagine                                                   | C4H8N2O3         | 3.189        | -0.383        | 375        |
| 1,2-Dibenzylsulfane                                            | C14H14S2         | 3.199        | 0.138         | 376        |
| DL-Glutamic acid                                               | C5H9NO4          | 3.235        | -0.846        | 377        |
| <b>Glutamic acid</b>                                           | <b>C5H9NO4</b>   | <b>3.235</b> | <b>-0.846</b> | <b>378</b> |
| Tramadol                                                       | C16H25NO2        | 3.240        | 0.179         | 379        |
| Biotin                                                         | C10H16N2O3S      | 3.259        | -0.312        | 380        |
| DL-Methionine                                                  | C5H11NO2S        | 3.291        | -0.281        | 381        |
| L-Methionine                                                   | C5H11NO2S        | 3.291        | -0.281        | 382        |
| Acetylmethionine                                               | C7H13NO3S        | 3.347        | -0.735        | 383        |
| 1,1'-Azo-bis(carbamide)                                        | C2H4N4O2         | 3.446        | -0.126        | 384        |
| Cholic acid                                                    | C24H40O5         | 3.538        | -1.053        | 385        |
| <b>Heptanol<sup>CSD</sup></b>                                  | <b>C7H16O</b>    | <b>3.569</b> | <b>-0.003</b> | <b>386</b> |
| Nonanoic acid                                                  | C9H18O2          | 3.598        | -0.994        | 387        |
| Lidocaine                                                      | C18H32O2         | 3.640        | 0.068         | 388        |
| 4-Allyl-2-methoxyphenyl benzoate                               | C17H16O3         | 3.750        | 0.178         | 389        |
| Tromethamine                                                   | C4H11NO3         | 3.921        | -0.161        | 390        |
| <b>Suberic acid</b>                                            | <b>C8H14O4</b>   | <b>3.932</b> | <b>-1.170</b> | <b>391</b> |
| Sucralose                                                      | C12H19Cl3O8      | 4.008        | -1.604        | 392        |
| DL-Glutamine                                                   | C5H10N2O3        | 4.029        | -0.052        | 393        |
| <b>L-Glutamine</b>                                             | <b>C5H10N2O3</b> | <b>4.029</b> | <b>-0.052</b> | <b>394</b> |
| <b>Octanol<sup>CSD</sup></b>                                   | <b>C8H18O</b>    | <b>4.074</b> | <b>-0.008</b> | <b>395</b> |
| 1,6-Hexanedithiol                                              | C6H14S2          | 4.095        | 0.013         | 396        |
| Decanoic acid                                                  | C10H20O2         | 4.160        | -0.942        | 397        |
| Vitamin A acetate                                              | C22H32O2         | 4.441        | 0.360         | 398        |
| D-Arabinitol                                                   | C5H12O5          | 4.590        | -0.512        | 399        |
| DL-Arabinitol                                                  | C5H12O5          | 4.590        | -0.512        | 400        |
| Ribitol                                                        | C5H12O5          | 4.590        | -0.512        | 401        |
| Xylitol                                                        | C5H12O5          | 4.590        | -0.512        | 402        |
| L-Cystine                                                      | C6H12N2O4S2      | 4.591        | -1.531        | 403        |
| Sebacic acid                                                   | C10H18O4         | 4.613        | -1.509        | 404        |
| D-Lysine                                                       | C6H14N2O2        | 4.615        | 0.023         | 405        |
| L-Lysine                                                       | C6H14N2O2        | 4.615        | 0.023         | 406        |
| Undecanoic Acid                                                | C11H22O2         | 4.695        | -0.917        | 407        |
| 2,2',2''-Nitrilotriethanol                                     | C6H15NO3         | 4.985        | -0.117        | 408        |
| $\alpha,\alpha$ -Trehalose                                     | C12H22O11        | 5.154        | -1.478        | 409        |
| $\alpha,\alpha$ -Galacto-trehalose                             | C12H22O11        | 5.154        | -1.478        | 410        |

|                                                               |                  |              |               |            |
|---------------------------------------------------------------|------------------|--------------|---------------|------------|
| 1,8-Octanedithiol                                             | C8H18S2          | 5.173        | 0.071         | 411        |
| DL-Arginine                                                   | C6H14N4O2        | 5.192        | 0.090         | 412        |
| <b>L-Arginine</b>                                             | <b>C6H14N4O2</b> | <b>5.192</b> | <b>0.090</b>  | <b>413</b> |
| Lauric acid                                                   | C12H24O2         | 5.217        | -0.905        | 414        |
| $\alpha$ -8'- $\beta$ -Apocarotenal                           | C30H40O          | 5.519        | 0.417         | 415        |
| $\beta$ -8'- $\beta$ -Apocarotenal                            | C30H40O          | 5.519        | 0.417         | 416        |
| $\beta$ -Cellobiose                                           | C12H22O11        | 5.660        | -0.973        | 417        |
| o- $\beta$ -D-Mannopyranosyl-(1-4)- $\alpha$ -D-mannopyranose | C12H22O11        | 5.660        | -0.973        | 418        |
| $\alpha$ -Lactose                                             | C12H22O11        | 5.660        | -0.973        | 419        |
| $\beta$ -Lactose                                              | C12H22O11        | 5.660        | -0.973        | 420        |
| $\beta$ -Maltose                                              | C12H22O11        | 5.660        | -0.973        | 421        |
| $\alpha$ -Maltose                                             | C12H22O11        | 5.660        | -0.973        | 422        |
| $\beta$ -galabiose                                            | C12H22O11        | 5.665        | -2.498        | 423        |
| Allitol                                                       | C6H14O6          | 5.678        | -0.445        | 424        |
| Galactitol                                                    | C6H14O6          | 5.678        | -0.445        | 425        |
| D-Glucitol                                                    | C6H14O6          | 5.678        | -0.445        | 426        |
| D-Iditol                                                      | C6H14O6          | 5.678        | -0.445        | 427        |
| I-Iditol                                                      | C6H14O6          | 5.678        | -0.445        | 428        |
| D-Altritol                                                    | C6H14O6          | 5.678        | -0.445        | 429        |
| D-Mannitol                                                    | C6H14O6          | 5.678        | -0.445        | 430        |
| DL-Mannitol                                                   | C6H14O6          | 5.678        | -0.445        | 431        |
| 1,9-Nonanedithiol                                             | C9H20S2          | 5.712        | 0.100         | 432        |
| Tridecanoic Acid                                              | C13H26O2         | 5.744        | -0.889        | 433        |
| n-Methyl-D-glucamine                                          | C7H17NO5         | 5.812        | -0.310        | 434        |
| Sucrose                                                       | C12H22O11        | 6.173        | -0.969        | 435        |
| Tetradecanoic acid                                            | C14H28O2         | 6.280        | -0.863        | 436        |
| 1,11-Undecanediol                                             | C11H24O2         | 6.559        | -0.074        | 437        |
| Neotame                                                       | C20H30N2O5       | 6.689        | -0.454        | 438        |
| Pentadecanoic acid                                            | C15H30O2         | 6.815        | -0.838        | 439        |
| Linoleic acid                                                 | C18H32O2         | 7.301        | -0.862        | 440        |
| Palmitic Acid                                                 | C16H32O2         | 7.350        | -0.813        | 441        |
| 1,13-Tridecanediol                                            | C13H28O2         | 7.620        | -0.033        | 442        |
| n-Hexadecanol                                                 | C16H34O          | 8.401        | 0.237         | 443        |
| <b>Stearic acid</b>                                           | <b>C18H36O2</b>  | <b>8.418</b> | <b>-0.765</b> | <b>444</b> |
| Sucrose octa-acetate                                          | C28H38O19        | 11.476       | 0.251         | 445        |
| 1,2-Distearoyl-3-elaidoylglycerol                             | C57H108O6        | 29.408       | 0.837         | 446        |
| 1,3-Distearoyl-2-oleoylglycerol                               | C57H108O6        | 29.490       | 0.919         | 447        |
| 2-(Oleoyloxy)propane-1,3-diyl distearate                      | C57H108O6        | 29.490       | 0.919         | 448        |
| 1,3-Distearoyl-2-elaidoylglycerol                             | C57H108O6        | 29.492       | 0.921         | 449        |
| $\beta$ -Tristearin                                           | C57H110O6        | 30.039       | 0.958         | 450        |

Table S7 – Scores and Ranking obtained for CV, MC, HBP, COSMOQuick and the three consensus ranking A, B and C for the multicomponent analysis of 450 co-formers against NVP molecule. The co-formers were ordered by the consensus ranking C, obtained from the sum of ranking positions obtained for MC, HBP analysis, and CosmoQuick prediction. In bold are represented the 76 molecules for which experimental multicomponent results are available. Black-italic letter identify the positive results; CSD means molecules reported in the CSD database. Red-underline letter identify the negative results.

| Co-former                                   | Molecular formula | CV score      | CV ranking | MC score     | MC ranking | HBP score   | HBP ranking | Consensus A | Consensus Ranking A | $f_{\text{fit}}$ | $H_{\text{ex}}$ (kcal.mol <sup>-1</sup> ) | COSMOQuick ranking | Consensus B | Consensus ranking B | Consensus C | Consensus ranking C |
|---------------------------------------------|-------------------|---------------|------------|--------------|------------|-------------|-------------|-------------|---------------------|------------------|-------------------------------------------|--------------------|-------------|---------------------|-------------|---------------------|
| 2,4-Dihydroxybenzoic acid                   | C7H6O4            | -0.710        | 65         | 6.147        | 114        | 0.35        | 14          | 193         | 10                  | -2.421           | -4.972                                    | 15                 | 208         | 1                   | 143         | 1                   |
| <i>Benzoic acid</i> <sup>CSD</sup>          | <i>C7H6O2</i>     | <i>-0.058</i> | <i>161</i> | <i>5.563</i> | <i>72</i>  | <i>0.23</i> | <i>51</i>   | <i>284</i>  | <i>35</i>           | <i>-0.019</i>    | <i>-1.549</i>                             | <i>57</i>          | <i>341</i>  | <i>9</i>            | <i>180</i>  | <i>2</i>            |
| Anthranilic acid                            | C7H7NO2           | -0.259        | 125        | 6.321        | 129        | 0.28        | 27          | 281         | 32                  | -0.174           | -2.215                                    | 50                 | 331         | 8                   | 206         | 3                   |
| Terephthalic acid                           | C8H6O4            | -0.741        | 61         | 5.250        | 53         | 0.18        | 111         | 225         | 14                  | -0.423           | -2.974                                    | 46                 | 271         | 2                   | 210         | 4                   |
| <i>4-Aminobenzoic acid</i>                  | <i>C7H7NO2</i>    | <i>-0.311</i> | <i>108</i> | <i>5.702</i> | <i>81</i>  | <i>0.26</i> | <i>38</i>   | <i>227</i>  | <i>16</i>           | <i>0.680</i>     | <i>-1.361</i>                             | <i>97</i>          | <i>324</i>  | <i>7</i>            | <i>216</i>  | <i>5</i>            |
| Allocinnamic acid                           | C9H8O2            | -0.267        | 123        | 5.778        | 84         | 0.26        | 36          | 243         | 20                  | 0.691            | -1.349                                    | 101                | 344         | 10                  | 221         | 6                   |
| 2-Amino-5-methylbenzoic acid                | C8H9NO2           | -0.212        | 135        | 6.475        | 151        | 0.30        | 21          | 307         | 39                  | -0.096           | -2.137                                    | 53                 | 360         | 18                  | 225         | 7                   |
| <i>Fumaric acid</i>                         | <i>C4H4O4</i>     | <i>0.103</i>  | <i>181</i> | <i>6.233</i> | <i>123</i> | <i>0.22</i> | <i>66</i>   | <i>370</i>  | <i>67</i>           | <i>-0.707</i>    | <i>-3.258</i>                             | <i>40</i>          | <i>410</i>  | <i>26</i>           | <i>229</i>  | <i>8</i>            |
| <i>3-Hydroxybenzoic acid</i> <sup>CSD</sup> | <i>C7H6O3</i>     | <i>-0.841</i> | <i>52</i>  | <i>6.321</i> | <i>128</i> | <i>0.21</i> | <i>75</i>   | <i>255</i>  | <i>23</i>           | <i>-1.271</i>    | <i>-3.311</i>                             | <i>29</i>          | <i>284</i>  | <i>3</i>            | <i>232</i>  | <i>9</i>            |
| <i>Maleic Acid</i> <sup>CSD</sup>           | <i>C4H4O4</i>     | <i>-0.609</i> | <i>73</i>  | <i>6.551</i> | <i>158</i> | <i>0.27</i> | <i>33</i>   | <i>264</i>  | <i>29</i>           | <i>-0.568</i>    | <i>-3.119</i>                             | <i>42</i>          | <i>306</i>  | <i>5</i>            | <i>233</i>  | <i>10</i>           |
| <i>4-Hydroxybenzoic acid</i> <sup>CSD</sup> | <i>C7H6O3</i>     | <i>-0.808</i> | <i>56</i>  | <i>5.795</i> | <i>85</i>  | <i>0.17</i> | <i>117</i>  | <i>258</i>  | <i>24</i>           | <i>-0.868</i>    | <i>-2.909</i>                             | <i>32</i>          | <i>290</i>  | <i>4</i>            | <i>234</i>  | <i>11</i>           |
| Methyl paraben                              | C8H8O3            | -0.216        | 134        | 5.975        | 98         | 0.23        | 54          | 286         | 36                  | 0.480            | -1.561                                    | 84                 | 370         | 20                  | 236         | 12                  |
| <i>Salicylic acid</i> <sup>CSD</sup>        | <i>C7H6O3</i>     | <i>-0.309</i> | <i>109</i> | <i>6.219</i> | <i>121</i> | <i>0.20</i> | <i>90</i>   | <i>320</i>  | <i>44</i>           | <i>-1.170</i>    | <i>-3.211</i>                             | <i>30</i>          | <i>350</i>  | <i>11</i>           | <i>241</i>  | <i>13</i>           |
| 4-Methoxybenzoic acid                       | C8H8O3            | 0.333         | 209        | 5.802        | 86         | 0.24        | 49          | 344         | 57                  | 0.773            | -1.267                                    | 112                | 456         | 33                  | 247         | 14                  |
| Myricetin                                   | C15H10O8          | 1.476         | 388        | 5.856        | 92         | 0.14        | 152         | 632         | 174                 | -3.176           | -7.258                                    | 6                  | 638         | 90                  | 250         | 15                  |
| Phenoxyacetic acid                          | C8H8O3            | 0.371         | 210        | 5.827        | 89         | 0.26        | 39          | 338         | 53                  | 0.860            | -1.691                                    | 124                | 462         | 35                  | 252         | 16                  |
| 2-Coumaric acid                             | C9H8O3            | -0.738        | 62         | 5.552        | 71         | 0.16        | 128         | 261         | 26                  | 0.013            | -2.538                                    | 58                 | 319         | 6                   | 257         | 17                  |
| <u>Hydroquinone</u>                         | <u>C6H6O2</u>     | <u>-0.286</u> | <u>115</u> | <u>5.834</u> | <u>90</u>  | <u>0.13</u> | <u>165</u>  | <u>370</u>  | <u>68</u>           | <u>-2.288</u>    | <u>-3.819</u>                             | <u>17</u>          | <u>387</u>  | <u>23</u>           | <u>272</u>  | <u>18</u>           |
| 1-Hydroxy-2-naphthoic acid                  | C11H8O3           | -0.435        | 90         | 5.250        | 52         | 0.10        | 195         | 337         | 52                  | -1.373           | -3.414                                    | 27                 | 364         | 19                  | 274         | 19                  |
| 2,6-Dimethylpyrazine                        | C6H8N2            | 2.008         | 420        | 6.364        | 135        | 0.28        | 26          | 581         | 151                 | 0.777            | -0.243                                    | 113                | 694         | 117                 | 274         | 20                  |
| 3-Methylbut-2-enoic acid                    | C5H8O2            | -0.150        | 143        | 6.587        | 161        | 0.29        | 24          | 328         | 47                  | 0.597            | -0.934                                    | 92                 | 420         | 28                  | 277         | 21                  |
| Pyrrole                                     | C4H5N             | -0.604        | 74         | 6.868        | 182        | 0.43        | 7           | 263         | 28                  | 0.608            | -0.412                                    | 93                 | 356         | 15                  | 282         | 22                  |
| <i>Cinnamic acid</i>                        | <i>C9H8O2</i>     | <i>0.156</i>  | <i>190</i> | <i>4.950</i> | <i>44</i>  | <i>0.21</i> | <i>76</i>   | <i>310</i>  | <i>40</i>           | <i>1.076</i>     | <i>-0.965</i>                             | <i>175</i>         | <i>485</i>  | <i>43</i>           | <i>295</i>  | <i>23</i>           |
| 4'-Hydroxyacetophenone                      | C8H8O2            | 0.442         | 218        | 6.096        | 110        | 0.16        | 129         | 457         | 95                  | 0.236            | -1.295                                    | 65                 | 522         | 50                  | 304         | 24                  |
| Pterostilbene                               | C16H16O3          | -0.843        | 51         | 5.884        | 94         | 0.16        | 132         | 277         | 30                  | 0.435            | -2.626                                    | 79                 | 356         | 16                  | 305         | 25                  |
| [1,1'-Biphenyl]-4,4'-diol                   | C12H10O2          | -0.296        | 112        | 4.197        | 18         | 0.01        | 274         | 404         | 75                  | -2.688           | -4.728                                    | 14                 | 418         | 27                  | 306         | 26                  |
| <i>Gentisic acid</i> <sup>CSD</sup>         | <i>C7H6O4</i>     | <i>-0.718</i> | <i>64</i>  | <i>6.369</i> | <i>136</i> | <i>0.13</i> | <i>162</i>  | <i>362</i>  | <i>62</i>           | <i>-1.985</i>    | <i>-4.536</i>                             | <i>20</i>          | <i>382</i>  | <i>21</i>           | <i>318</i>  | <i>27</i>           |
| 1-Naphthol                                  | C10H8O            | -0.959        | 35         | 5.660        | 77         | 0.06        | 231         | 343         | 55                  | -2.741           | -3.762                                    | 13                 | 356         | 17                  | 321         | 28                  |

|                                                             |               |               |            |              |            |             |            |            |            |               |               |            |            |            |            |           |
|-------------------------------------------------------------|---------------|---------------|------------|--------------|------------|-------------|------------|------------|------------|---------------|---------------|------------|------------|------------|------------|-----------|
| 2-Acetylpyrrole                                             | C6H7NO        | -0.280        | 119        | 6.673        | 170        | 0.29        | 23         | 312        | 43         | 0.915         | -0.105        | 135        | 447        | 31         | 328        | 29        |
| Trimesic acid                                               | C9H6O6        | -1.001        | 25         | 6.614        | 164        | 0.17        | 123        | 312        | 41         | -0.567        | -4.139        | 43         | 355        | 13         | 330        | 30        |
| 2-Phenylacetic acid                                         | C8H8O2        | -0.103        | 151        | 6.616        | 165        | 0.20        | 89         | 405        | 77         | 0.417         | -1.624        | 78         | 483        | 41         | 332        | 31        |
| <b>Phloroglucinol</b>                                       | <b>C6H6O3</b> | <b>0.397</b>  | <b>213</b> | <b>6.904</b> | <b>188</b> | <b>0.15</b> | <b>143</b> | <b>544</b> | <b>134</b> | <b>-3.654</b> | <b>-5.695</b> | <b>3</b>   | <b>547</b> | <b>61</b>  | <b>334</b> | <b>32</b> |
| 1,4-Phenylenediamine                                        | C6H8N2        | 0.755         | 270        | 5.678        | 79         | 0.26        | 35         | 384        | 73         | 1.361         | -0.170        | 222        | 606        | 76         | 336        | 33        |
| 1,2-Ethanedithiol                                           | C2H6S2        | -1.099        | 10         | 5.451        | 62         | 0.48        | 1          | 73         | 1          | 1.856         | -0.185        | 283        | 356        | 14         | 346        | 34        |
| 4-Ethoxyphenol                                              | C8H10O2       | -1.134        | 3          | 5.976        | 99         | 0.10        | 196        | 298        | 37         | -0.027        | -2.068        | 56         | 354        | 12         | 351        | 35        |
| 4-(Hydroxymethyl)phenol                                     | C7H8O2        | -0.809        | 54         | 6.734        | 175        | 0.19        | 98         | 327        | 46         | 0.474         | -1.567        | 82         | 409        | 25         | 355        | 36        |
| <b>Resorcinol</b>                                           | <b>C6H6O2</b> | <b>-0.285</b> | <b>116</b> | <b>6.701</b> | <b>173</b> | <b>0.12</b> | <b>181</b> | <b>470</b> | <b>106</b> | <b>-3.215</b> | <b>-4.745</b> | <b>5</b>   | <b>475</b> | <b>38</b>  | <b>359</b> | <b>37</b> |
| 4-Hydroxybenzaldehyde                                       | C7H6O2        | 0.646         | 242        | 5.593        | 74         | 0.05        | 241        | 557        | 138        | -0.279        | -1.810        | 48         | 605        | 75         | 363        | 38        |
| <b>Catechol</b>                                             | <b>C6H6O2</b> | <b>-0.180</b> | <b>137</b> | <b>7.047</b> | <b>197</b> | <b>0.13</b> | <b>160</b> | <b>494</b> | <b>113</b> | <b>-3.049</b> | <b>-4.579</b> | <b>9</b>   | <b>503</b> | <b>45</b>  | <b>366</b> | <b>39</b> |
| Crotonic acid                                               | C4H6O2        | 0.130         | 187        | 6.423        | 143        | 0.15        | 136        | 466        | 105        | 0.495         | -1.035        | 87         | 553        | 66         | 366        | 40        |
| cis-Aconitic acid                                           | C6H6O6        | -0.985        | 29         | 8.153        | 305        | 0.28        | 28         | 362        | 63         | -0.762        | -4.843        | 35         | 397        | 24         | 368        | 41        |
| Phenol                                                      | C6H6O         | -1.064        | 17         | 6.211        | 120        | 0.07        | 227        | 364        | 65         | -1.853        | -2.873        | 23         | 387        | 22         | 370        | 42        |
| 4-Nitrobenzoic acid                                         | C7H5NO4       | 0.934         | 304        | 6.023        | 103        | 0.06        | 232        | 639        | 176        | -0.500        | -2.541        | 44         | 683        | 109        | 379        | 43        |
| <b>Gallic acid</b>                                          | <b>C7H6O5</b> | <b>0.773</b>  | <b>276</b> | <b>7.414</b> | <b>233</b> | <b>0.15</b> | <b>138</b> | <b>647</b> | <b>181</b> | <b>-2.402</b> | <b>-5.463</b> | <b>16</b>  | <b>663</b> | <b>101</b> | <b>387</b> | <b>44</b> |
| Vanillic acid                                               | C8H8O4        | -0.914        | 44         | 7.428        | 238        | 0.21        | 81         | 363        | 64         | 0.265         | -2.286        | 68         | 431        | 29         | 387        | 45        |
| (E)-4,4'-Diazastilbene                                      | C12H10N2      | 2.224         | 427        | 4.394        | 24         | 0.14        | 148        | 599        | 159        | 1.285         | -0.246        | 218        | 817        | 168        | 390        | 46        |
| Isocaryolan-9 $\alpha$ -ol                                  | C15H26O       | -0.494        | 86         | 7.432        | 240        | 0.33        | 17         | 343        | 56         | 0.936         | -0.084        | 138        | 481        | 39         | 395        | 47        |
| <b>Acetylsalicylic acid</b>                                 | <b>C9H8O4</b> | <b>0.759</b>  | <b>271</b> | <b>7.395</b> | <b>231</b> | <b>0.27</b> | <b>31</b>  | <b>533</b> | <b>131</b> | <b>0.936</b>  | <b>-1.615</b> | <b>137</b> | <b>670</b> | <b>104</b> | <b>399</b> | <b>48</b> |
| 1,7,7-Trimethyltricyclo(2.2.1.0 <sup>2,6</sup> )heptan-4-ol | C10H16O       | -0.689        | 68         | 8.333        | 325        | 0.33        | 16         | 409        | 80         | 0.106         | -0.914        | 59         | 468        | 37         | 400        | 49        |
| <b>Orcinol</b>                                              | <b>C7H8O2</b> | <b>-0.295</b> | <b>113</b> | <b>7.377</b> | <b>230</b> | <b>0.13</b> | <b>169</b> | <b>512</b> | <b>122</b> | <b>-2.806</b> | <b>-4.336</b> | <b>12</b>  | <b>524</b> | <b>52</b>  | <b>411</b> | <b>50</b> |
| 1,6-Hexanedithiol                                           | C6H14S2       | -0.615        | 72         | 3.827        | 11         | 0.44        | 4          | 87         | 2          | 4.095         | 0.013         | 396        | 483        | 40         | 411        | 51        |
| 2,5-Dimethylphenol                                          | C8H10O        | -0.935        | 40         | 6.393        | 140        | 0.04        | 251        | 431        | 87         | -1.871        | -2.891        | 21         | 452        | 32         | 412        | 52        |
| 1,8-Octanedithiol                                           | C8H18S2       | -0.413        | 94         | 3.444        | 5          | 0.47        | 2          | 101        | 3          | 5.173         | 0.071         | 411        | 512        | 47         | 418        | 53        |
| 2,4,6-Trimethylphenol                                       | C9H12O        | -0.955        | 36         | 6.892        | 185        | 0.09        | 205        | 426        | 86         | -0.820        | -1.841        | 34         | 460        | 34         | 424        | 54        |
| Pyrazine-1,4-dioxide                                        | C4H4N2O2      | 2.993         | 446        | 6.951        | 191        | 0.24        | 50         | 687        | 211        | 1.108         | 0.087         | 183        | 870        | 184        | 424        | 55        |
| N,N-Dimethylformamide                                       | C3H7NO        | 1.739         | 411        | 8.088        | 299        | 0.31        | 20         | 730        | 240        | 0.723         | -0.297        | 105        | 835        | 171        | 424        | 56        |
| Chloranilic acid                                            | C6H2Cl2O4     | -0.222        | 132        | 6.353        | 134        | -0.01       | 283        | 549        | 135        | -3.084        | -4.615        | 8          | 557        | 68         | 425        | 57        |
| 4-Nitrophenol                                               | C6H5NO3       | 0.382         | 212        | 6.353        | 133        | 0.01        | 276        | 621        | 167        | -2.268        | -3.799        | 18         | 639        | 92         | 427        | 58        |
| <b>Adipic acid</b>                                          | <b>C10H18</b> | <b>-0.703</b> | <b>66</b>  | <b>5.519</b> | <b>69</b>  | <b>0.27</b> | <b>32</b>  | <b>167</b> | <b>8</b>   | <b>2.418</b>  | <b>-1.664</b> | <b>330</b> | <b>497</b> | <b>44</b>  | <b>431</b> | <b>59</b> |
| 2-Chloroacetic acid                                         | C2H3ClO2      | 0.419         | 216        | 7.220        | 214        | 0.12        | 177        | 607        | 164        | -0.639        | -2.169        | 41         | 648        | 95         | 432        | 60        |
| <b>Ethanol<sup>CSD</sup></b>                                | <b>C2H5OH</b> | <b>0.538</b>  | <b>222</b> | <b>7.419</b> | <b>234</b> | <b>0.22</b> | <b>65</b>  | <b>521</b> | <b>126</b> | <b>0.914</b>  | <b>-0.106</b> | <b>134</b> | <b>655</b> | <b>97</b>  | <b>433</b> | <b>61</b> |

|                                                      |                  |               |            |              |            |             |            |            |            |               |               |            |            |            |            |           |
|------------------------------------------------------|------------------|---------------|------------|--------------|------------|-------------|------------|------------|------------|---------------|---------------|------------|------------|------------|------------|-----------|
| 4,4'-Bipyridine                                      | C10H8N2          | 2.319         | 434        | 5.454        | 63         | 0.03        | 258        | 755        | 264        | 0.801         | -0.219        | 115        | 870        | 185        | 436        | 62        |
| 1,3-Propanedithiol                                   | C3H8S2           | -0.968        | 32         | 5.979        | 100        | 0.46        | 3          | 135        | 5          | 2.438         | -0.113        | 333        | 468        | 36         | 436        | 63        |
| Cyclohexane-1,4-diamine                              | C6H14N2          | -1.143        | 1          | 6.897        | 186        | 0.25        | 40         | 227        | 17         | 1.208         | -0.323        | 210        | 437        | 30         | 436        | 64        |
| Acetic acid                                          | C2H4O2           | 0.293         | 202        | 8.325        | 324        | 0.22        | 60         | 586        | 153        | -0.111        | -1.132        | 52         | 638        | 89         | 436        | 65        |
| <b>Glutaric acid<sup>CSD</sup></b>                   | <b>C5H8O4</b>    | <b>-0.505</b> | <b>84</b>  | <b>5.876</b> | <b>93</b>  | <b>0.22</b> | <b>67</b>  | <b>244</b> | <b>21</b>  | <b>1.783</b>  | <b>-1.788</b> | <b>279</b> | <b>523</b> | <b>51</b>  | <b>439</b> | <b>66</b> |
| 2,5-bis(4-Pyridyl)-1,3,4-oxadiazole                  | C12H8N4O         | 3.383         | 447        | 4.927        | 43         | 0.13        | 157        | 647        | 182        | 1.491         | -0.040        | 240        | 887        | 192        | 440        | 67        |
| 1,4,8,11-Tetra-azacyclotetradecane                   | C10H24N4         | 0.786         | 277        | 6.937        | 189        | 0.18        | 106        | 572        | 145        | 0.941         | -0.079        | 145        | 717        | 133        | 440        | 68        |
| Formic acid                                          | CH2O2            | 0.692         | 251        | 8.838        | 364        | 0.25        | 43         | 658        | 186        | -0.864        | -1.885        | 33         | 691        | 115        | 440        | 69        |
| 1,9-Nonanedithiol                                    | C9H20S2          | -0.322        | 107        | 3.341        | 4          | 0.44        | 5          | 116        | 4          | 5.712         | 0.100         | 432        | 548        | 62         | 441        | 70        |
| o-Cresol                                             | C7H8O            | -0.930        | 42         | 7.038        | 196        | 0.07        | 226        | 464        | 102        | -2.097        | -3.117        | 19         | 483        | 42         | 441        | 71        |
| Quinoxaline-N,N'-dioxide                             | C8H6N2O2         | 2.874         | 445        | 6.603        | 163        | 0.18        | 109        | 717        | 223        | 1.056         | 0.036         | 172        | 889        | 194        | 444        | 72        |
| 2,4-Pyridinedicarboxylic acid                        | C7H5NO4          | 0.831         | 284        | 6.434        | 144        | 0.04        | 250        | 678        | 202        | -0.148        | -2.699        | 51         | 729        | 141        | 445        | 73        |
| Ibuprofen                                            | C13H18O2         | -0.349        | 102        | 5.841        | 91         | 0.16        | 130        | 323        | 45         | 1.410         | -1.651        | 226        | 549        | 63         | 447        | 74        |
| 2,2,2-Trifluoroethanol                               | C2H3F3O          | 0.126         | 186        | 8.087        | 298        | 0.17        | 115        | 599        | 160        | -0.755        | -1.775        | 36         | 635        | 87         | 449        | 75        |
| <b>Trichloroacetic acid<sup>CSD</sup></b>            | <b>C2HCl3O2</b>  | <b>0.623</b>  | <b>235</b> | <b>8.931</b> | <b>372</b> | <b>0.22</b> | <b>69</b>  | <b>676</b> | <b>201</b> | <b>-2.918</b> | <b>-3.938</b> | <b>10</b>  | <b>686</b> | <b>113</b> | <b>451</b> | <b>76</b> |
| <b>Naphthalene-1,5-disulfonic acid<sup>CSD</sup></b> | <b>C10H8S2O6</b> | <b>1.009</b>  | <b>317</b> | <b>7.088</b> | <b>201</b> | <b>0.07</b> | <b>225</b> | <b>743</b> | <b>252</b> | <b>-1.381</b> | <b>-3.932</b> | <b>26</b>  | <b>769</b> | <b>155</b> | <b>452</b> | <b>77</b> |
| <b>L-Mandelic acid</b>                               | <b>C8H8O3</b>    | <b>-0.455</b> | <b>88</b>  | <b>7.746</b> | <b>270</b> | <b>0.15</b> | <b>141</b> | <b>499</b> | <b>119</b> | <b>-0.361</b> | <b>-2.912</b> | <b>47</b>  | <b>546</b> | <b>60</b>  | <b>458</b> | <b>78</b> |
| 5-Nitroisophthalic acid                              | C8H5NO6          | 0.628         | 237        | 7.518        | 250        | 0.12        | 172        | 659        | 188        | -0.727        | -3.788        | 39         | 698        | 121        | 461        | 79        |
| 4-Methylbenzenesulfonic acid                         | C7H8O3S          | 0.933         | 303        | 6.549        | 157        | 0.02        | 268        | 728        | 238        | -0.748        | -2.278        | 37         | 765        | 153        | 462        | 80        |
| <b>Glycolic acid</b>                                 | <b>C2H4O3</b>    | <b>-0.260</b> | <b>124</b> | <b>8.219</b> | <b>313</b> | <b>0.20</b> | <b>86</b>  | <b>523</b> | <b>128</b> | <b>0.234</b>  | <b>-1.807</b> | <b>64</b>  | <b>587</b> | <b>73</b>  | <b>463</b> | <b>81</b> |
| Trifluoroacetic acid                                 | C2HF3O2          | 0.281         | 200        | 8.272        | 320        | 0.15        | 144        | 664        | 193        | -3.951        | -4.971        | 2          | 666        | 102        | 466        | 82        |
| Salicylaldehyde                                      | C7H6O2           | 1.171         | 347        | 6.554        | 159        | 0.14        | 154        | 660        | 190        | 0.970         | -0.561        | 154        | 814        | 167        | 467        | 83        |
| <b>L-Malic acid</b>                                  | <b>C4H6O5</b>    | <b>-0.851</b> | <b>49</b>  | <b>7.969</b> | <b>291</b> | <b>0.19</b> | <b>102</b> | <b>442</b> | <b>91</b>  | <b>0.388</b>  | <b>-3.183</b> | <b>75</b>  | <b>517</b> | <b>48</b>  | <b>468</b> | <b>84</b> |
| (R,S)-Hesperetin                                     | C16H14O6         | -0.299        | 111        | 7.017        | 194        | 0.13        | 156        | 461        | 100        | 0.817         | -2.244        | 119        | 580        | 70         | 469        | 85        |
| 2-Isopropyl-5-methylphenol                           | C10H14O          | -0.935        | 39         | 7.285        | 224        | 0.07        | 222        | 485        | 109        | -1.521        | -3.052        | 25         | 510        | 46         | 471        | 86        |
| <b>Succinic acid</b>                                 | <b>C4H6O4</b>    | <b>-0.165</b> | <b>141</b> | <b>8.205</b> | <b>312</b> | <b>0.22</b> | <b>68</b>  | <b>521</b> | <b>127</b> | <b>0.617</b>  | <b>-2.444</b> | <b>94</b>  | <b>615</b> | <b>81</b>  | <b>474</b> | <b>87</b> |
| N,N-Dimethylacetamide                                | C4H9NO           | 1.409         | 377        | 7.451        | 243        | 0.15        | 142        | 762        | 269        | 0.560         | -0.460        | 89         | 851        | 176        | 474        | 88        |
| <b>L-Tartaric acid</b>                               | <b>C4H6O6</b>    | <b>-0.616</b> | <b>71</b>  | <b>9.120</b> | <b>384</b> | <b>0.31</b> | <b>18</b>  | <b>473</b> | <b>107</b> | <b>0.334</b>  | <b>-3.747</b> | <b>73</b>  | <b>546</b> | <b>59</b>  | <b>475</b> | <b>89</b> |
| Pyrazine                                             | C4H4N2           | 2.451         | 438        | 7.024        | 195        | 0.16        | 133        | 766        | 273        | 0.955         | -0.066        | 148        | 914        | 208        | 476        | 90        |
| Butan-1-amine                                        | C4H11N           | 0.009         | 172        | 5.546        | 70         | 0.16        | 131        | 373        | 69         | 1.804         | -0.237        | 280        | 653        | 96         | 481        | 91        |
| Pyridine                                             | C5H5N            | 1.486         | 390        | 6.891        | 184        | 0.12        | 180        | 754        | 261        | 0.807         | -0.213        | 117        | 871        | 187        | 481        | 92        |
| 3,5-Dinitrobenzoic acid                              | C7H4N2O6         | 1.453         | 384        | 7.361        | 229        | 0.08        | 217        | 830        | 321        | -0.738        | -3.289        | 38         | 868        | 182        | 484        | 93        |
| Lactic acid                                          | C3H6O3           | -0.962        | 34         | 9.102        | 380        | 0.25        | 44         | 458        | 96         | 0.216         | -1.825        | 63         | 521        | 49         | 487        | 94        |
| 4-Acetamidobenzoic acid                              | C9H9NO3          | -0.373        | 98         | 5.909        | 96         | 0.12        | 171        | 365        | 66         | 1.334         | -1.217        | 221        | 586        | 72         | 488        | 95        |



|                                                              |                 |               |            |              |            |             |            |            |            |               |               |            |            |            |            |            |
|--------------------------------------------------------------|-----------------|---------------|------------|--------------|------------|-------------|------------|------------|------------|---------------|---------------|------------|------------|------------|------------|------------|
| <b>Ferulic acid</b>                                          | <b>C10H10O4</b> | <b>-0.885</b> | <b>45</b>  | <b>6.375</b> | <b>138</b> | <b>0.19</b> | <b>100</b> | <b>283</b> | <b>34</b>  | <b>1.595</b>  | <b>-1.467</b> | <b>255</b> | <b>538</b> | <b>58</b>  | <b>493</b> | <b>96</b>  |
| Pentan-1-amine                                               | C5H13N          | -0.079        | 160        | 5.139        | 49         | 0.17        | 122        | 331        | 50         | 2.345         | -0.206        | 326        | 657        | 98         | 497        | 97         |
| <b>3,5-Dinitrosalicylic acid<sup>CSD</sup></b>               | <b>C7H4N2O7</b> | <b>1.293</b>  | <b>364</b> | <b>7.750</b> | <b>272</b> | <b>0.09</b> | <b>206</b> | <b>842</b> | <b>328</b> | <b>-1.861</b> | <b>-4.922</b> | <b>22</b>  | <b>864</b> | <b>180</b> | <b>500</b> | <b>98</b>  |
| Undecanoic Acid                                              | C11H22O2        | -0.176        | 139        | 3.939        | 13         | 0.21        | 80         | 232        | 18         | 4.695         | -0.917        | 407        | 639        | 91         | 500        | 99         |
| 3-Oxocyclobutanecarboxylic acid                              | C5H6O3          | 1.538         | 396        | 7.818        | 280        | 0.15        | 135        | 811        | 305        | 0.487         | -1.043        | 86         | 897        | 201        | 501        | 100        |
| Butyric acid                                                 | C4H8O2          | 0.117         | 182        | 7.952        | 289        | 0.20        | 84         | 555        | 137        | 0.910         | -1.131        | 130        | 685        | 111        | 503        | 101        |
| <b>Suberic acid</b>                                          | <b>C8H14O4</b>  | <b>-0.862</b> | <b>47</b>  | <b>4.734</b> | <b>35</b>  | <b>0.21</b> | <b>78</b>  | <b>160</b> | <b>7</b>   | <b>3.932</b>  | <b>-1.170</b> | <b>391</b> | <b>551</b> | <b>64</b>  | <b>504</b> | <b>102</b> |
| 4-(4-Hydroxyphenyl)butan-2-one                               | C10H12O2        | 0.298         | 204        | 6.299        | 126        | 0.16        | 134        | 464        | 101        | 1.522         | -1.029        | 245        | 709        | 129        | 505        | 103        |
| 1-Naphthalenesulfonic acid                                   | C10H8O3S        | 0.732         | 266        | 7.457        | 245        | 0.06        | 230        | 741        | 249        | -1.166        | -2.697        | 31         | 772        | 156        | 506        | 104        |
| Tetrahydrofuran                                              | C4H8O           | 1.163         | 345        | 8.623        | 352        | 0.27        | 34         | 731        | 243        | 0.819         | -0.201        | 120        | 851        | 174        | 506        | 105        |
| 2-Amino-5-picolinic acid                                     | C6H6N2O2        | 1.647         | 404        | 9.189        | 385        | 0.30        | 22         | 811        | 304        | 0.690         | -1.351        | 99         | 910        | 206        | 506        | 106        |
| Betaine                                                      | C5H10NO2        | 3.558         | 449        | 10.872       | 434        | 0.39        | 10         | 893        | 361        | 0.192         | -0.828        | 62         | 955        | 230        | 506        | 107        |
| <b>L-Ascorbic acid</b>                                       | <b>C6H8O6</b>   | <b>0.056</b>  | <b>177</b> | <b>8.518</b> | <b>342</b> | <b>0.21</b> | <b>77</b>  | <b>596</b> | <b>157</b> | <b>0.546</b>  | <b>-3.026</b> | <b>88</b>  | <b>684</b> | <b>110</b> | <b>507</b> | <b>108</b> |
| 3,3'-Thiodipropionic acid                                    | C6H10O4S        | -0.543        | 78         | 6.404        | 141        | 0.25        | 41         | 260        | 25         | 2.332         | -2.260        | 325        | 585        | 71         | 507        | 109        |
| 2,2'-Dihydroxy-5,5'-diallyl-biphenyl                         | C18H18O2        | -0.990        | 27         | 8.017        | 295        | 0.17        | 116        | 438        | 89         | 0.636         | -3.446        | 96         | 534        | 55         | 507        | 110        |
| Meso-Tartaric acid                                           | C4H6O6          | -0.355        | 101        | 10.055       | 414        | 0.31        | 19         | 534        | 133        | 0.334         | -3.747        | 74         | 608        | 77         | 507        | 111        |
| Tridecanoic Acid                                             | C13H26O2        | -0.053        | 162        | 3.657        | 8          | 0.22        | 70         | 240        | 19         | 5.744         | -0.889        | 433        | 673        | 106        | 511        | 112        |
| Hexan-1-amine                                                | C6H15N          | -0.080        | 159        | 4.599        | 32         | 0.17        | 121        | 312        | 42         | 2.878         | -0.183        | 359        | 671        | 105        | 512        | 113        |
| Sebacic acid                                                 | C10H18O4        | -0.942        | 38         | 4.241        | 19         | 0.20        | 91         | 148        | 6          | 4.613         | -1.509        | 404        | 552        | 65         | 514        | 114        |
| 2,5,5,8α-Tetramethyloctahydro-2H-2,4α-methanonaphthalen-1-ol | C15H26O         | -1.099        | 11         | 7.803        | 278        | 0.16        | 127        | 416        | 83         | 0.763         | -0.257        | 110        | 526        | 53         | 515        | 115        |
| Cyclobutanol                                                 | C4H8O           | -0.030        | 165        | 8.228        | 314        | 0.20        | 85         | 564        | 143        | 0.802         | -0.219        | 116        | 680        | 108        | 515        | 116        |
| 1,10-Phenanthroline                                          | C12H8N2         | 1.722         | 410        | 5.305        | 57         | -0.19       | 382        | 849        | 331        | 0.412         | -0.609        | 77         | 926        | 213        | 516        | 117        |
| Linoleic acid                                                | C18H32O2        | -0.337        | 104        | 4.716        | 34         | 0.25        | 45         | 183        | 9          | 7.301         | -0.862        | 440        | 623        | 82         | 519        | 118        |
| 2-(Tert-butyl)-4-methoxyphenol                               | C11H16O2        | -1.062        | 18         | 7.704        | 268        | 0.07        | 223        | 509        | 121        | -1.349        | -2.879        | 28         | 537        | 57         | 519        | 119        |
| <b>DL-Malic acid</b>                                         | <b>C4H6O5</b>   | <b>-1.069</b> | <b>16</b>  | <b>8.072</b> | <b>297</b> | <b>0.14</b> | <b>147</b> | <b>460</b> | <b>99</b>  | <b>0.388</b>  | <b>-3.183</b> | <b>76</b>  | <b>536</b> | <b>56</b>  | <b>520</b> | <b>120</b> |
| α-Ketoglutaric acid                                          | C5H6O5          | 0.817         | 281        | 6.778        | 178        | 0.02        | 272        | 731        | 241        | 0.279         | -3.292        | 70         | 801        | 161        | 520        | 121        |
| <b>n-Butanol<sup>CSD</sup></b>                               | <b>C4H10O</b>   | <b>-0.009</b> | <b>170</b> | <b>5.761</b> | <b>83</b>  | <b>0.14</b> | <b>153</b> | <b>406</b> | <b>78</b>  | <b>1.961</b>  | <b>-0.080</b> | <b>291</b> | <b>697</b> | <b>120</b> | <b>527</b> | <b>122</b> |
| Lauric acid                                                  | C12H24O2        | -0.012        | 169        | 3.884        | 12         | 0.19        | 101        | 282        | 33         | 5.217         | -0.905        | 414        | 696        | 118        | 527        | 123        |
| Trimethylamine                                               | C3H9N           | 1.562         | 401        | 7.961        | 290        | 0.18        | 113        | 804        | 296        | 0.865         | -0.156        | 125        | 929        | 216        | 528        | 124        |
| Cyclodecanol                                                 | C10H20O         | -0.523        | 82         | 7.264        | 221        | 0.15        | 137        | 440        | 90         | 1.054         | 0.034         | 171        | 611        | 79         | 529        | 125        |
| <b>Tartaric acid<sup>CSD</sup></b>                           | <b>C4H6O6</b>   | <b>-0.590</b> | <b>75</b>  | <b>8.598</b> | <b>348</b> | <b>0.18</b> | <b>110</b> | <b>533</b> | <b>132</b> | <b>0.334</b>  | <b>-3.747</b> | <b>72</b>  | <b>605</b> | <b>74</b>  | <b>530</b> | <b>126</b> |
| (+)-Camphoric acid                                           | C10H16O4        | -1.139        | 2          | 8.235        | 317        | 0.14        | 146        | 465        | 103        | 0.260         | -2.291        | 67         | 532        | 54         | 530        | 127        |
| Palmitic Acid                                                | C16H32O2        | -0.283        | 117        | 3.325        | 3          | 0.20        | 87         | 207        | 12         | 7.350         | -0.813        | 441        | 648        | 94         | 531        | 128        |

|                                                    |                 |               |            |              |            |              |            |            |            |               |               |            |            |            |            |            |
|----------------------------------------------------|-----------------|---------------|------------|--------------|------------|--------------|------------|------------|------------|---------------|---------------|------------|------------|------------|------------|------------|
| Propan-1-amine                                     | C3H9N           | 0.032         | 175        | 6.441        | 147        | 0.13         | 167        | 489        | 111        | 1.268         | -0.263        | 217        | 706        | 125        | 531        | 129        |
| <b>Nicotinic acid</b>                              | <b>C6H5NO2</b>  | <b>1.261</b>  | <b>358</b> | <b>6.122</b> | <b>112</b> | <b>-0.06</b> | <b>320</b> | <b>790</b> | <b>290</b> | <b>0.690</b>  | <b>-0.840</b> | <b>100</b> | <b>890</b> | <b>196</b> | <b>532</b> | <b>130</b> |
| Pentadecanoic acid                                 | C15H30O2        | -0.097        | 152        | 3.549        | 7          | 0.20         | 88         | 247        | 22         | 6.815         | -0.838        | 439        | 686        | 112        | 534        | 131        |
| 4,4'-Ethene-1,2-diylidipyridine                    | C12H10N2        | 2.241         | 429        | 4.346        | 23         | -0.03        | 292        | 744        | 253        | 1.285         | -0.246        | 219        | 963        | 235        | 534        | 132        |
| Phenyl 2-Hydroxybenzoate                           | C13H10O3        | -0.344        | 103        | 5.593        | 73         | 0.12         | 179        | 355        | 58         | 1.855         | -0.696        | 282        | 637        | 88         | 534        | 133        |
| Tetradecanoic acid                                 | C14H28O2        | -0.257        | 126        | 3.549        | 6          | 0.20         | 93         | 225        | 15         | 6.280         | -0.863        | 436        | 661        | 99         | 535        | 134        |
| 4-(Hydroxymethyl)-2-methoxyphenol                  | C8H10O3         | -0.950        | 37         | 8.157        | 306        | 0.14         | 149        | 492        | 112        | 0.439         | -2.112        | 80         | 572        | 69         | 535        | 135        |
| 2,6-Pyridinedicarboxylic acid                      | C7H5NO4         | 0.230         | 196        | 6.751        | 176        | 0.08         | 216        | 588        | 154        | 0.941         | -1.610        | 144        | 732        | 142        | 536        | 136        |
| (1R,2R)-Cyclohexane-1,2-Diamine                    | C6H14N2         | -0.585        | 76         | 7.890        | 285        | 0.25         | 47         | 408        | 79         | 1.183         | -0.348        | 204        | 612        | 80         | 536        | 137        |
| <b>Stearic acid</b>                                | <b>C18H36O2</b> | <b>-0.322</b> | <b>106</b> | <b>3.071</b> | <b>1</b>   | <b>0.20</b>  | <b>92</b>  | <b>199</b> | <b>11</b>  | <b>8.418</b>  | <b>-0.765</b> | <b>444</b> | <b>643</b> | <b>93</b>  | <b>537</b> | <b>138</b> |
| Ethylenediamine                                    | C2H8N2          | -0.490        | 87         | 7.344        | 228        | 0.11         | 186        | 501        | 120        | 0.857         | -0.673        | 123        | 624        | 84         | 537        | 139        |
| Acrylaldehyde                                      | C3H4O           | 1.543         | 398        | 6.336        | 130        | 0.06         | 235        | 763        | 270        | 1.071         | 0.051         | 174        | 937        | 218        | 539        | 140        |
| 2,2'-Bipyridine                                    | C10H8N2         | 1.496         | 391        | 4.594        | 31         | -0.09        | 344        | 766        | 272        | 1.034         | 0.014         | 166        | 932        | 217        | 541        | 141        |
| Hexanoic acid                                      | C6H12O2         | -0.017        | 167        | 5.171        | 50         | 0.10         | 200        | 417        | 84         | 1.996         | -1.065        | 292        | 709        | 128        | 542        | 142        |
| 1,2-Ethanedisulfonic acid                          | C2H6O6S2        | 1.315         | 366        | 7.255        | 219        | -0.06        | 312        | 897        | 366        | -2.853        | -5.914        | 11         | 908        | 205        | 542        | 143        |
| <b>Orotic acid</b>                                 | <b>CSH4N2O4</b> | <b>0.718</b>  | <b>260</b> | <b>7.181</b> | <b>212</b> | <b>0.01</b>  | <b>277</b> | <b>749</b> | <b>256</b> | <b>-0.071</b> | <b>-1.602</b> | <b>54</b>  | <b>803</b> | <b>162</b> | <b>543</b> | <b>144</b> |
| Propan-2-one                                       | C3H6O           | 1.334         | 368        | 7.405        | 232        | 0.13         | 159        | 759        | 267        | 0.983         | -0.038        | 158        | 917        | 209        | 549        | 145        |
| (2R,3R)-2,3-Dimethylcyclopropane-1-carboxylic acid | C6H10O2         | -0.081        | 157        | 7.638        | 265        | 0.10         | 203        | 625        | 171        | 0.451         | -1.079        | 81         | 706        | 126        | 549        | 146        |
| o-Anisic acid                                      | C8H8O3          | 0.093         | 179        | 7.425        | 236        | 0.28         | 29         | 444        | 92         | 1.883         | -0.158        | 285        | 729        | 140        | 550        | 147        |
| 1-Hydroxydiamantane                                | C14H20O         | -1.129        | 5          | 8.205        | 311        | 0.20         | 83         | 399        | 74         | 0.974         | -0.047        | 157        | 556        | 67         | 551        | 148        |
| <b>Ethyl acetate<sup>CSD</sup></b>                 | <b>C4H8O2</b>   | <b>1.144</b>  | <b>339</b> | <b>6.267</b> | <b>124</b> | <b>0.11</b>  | <b>185</b> | <b>648</b> | <b>183</b> | <b>1.523</b>  | <b>-0.007</b> | <b>246</b> | <b>894</b> | <b>198</b> | <b>555</b> | <b>149</b> |
| <b>Oxalic acid</b>                                 | <b>C2H2O4</b>   | <b>-0.093</b> | <b>153</b> | <b>7.512</b> | <b>248</b> | <b>-0.04</b> | <b>305</b> | <b>706</b> | <b>222</b> | <b>-3.469</b> | <b>-5.509</b> | <b>4</b>   | <b>710</b> | <b>130</b> | <b>557</b> | <b>150</b> |
| Acridine                                           | C13H9N          | 1.156         | 342        | 4.736        | 36         | -0.22        | 392        | 770        | 276        | 0.912         | -0.108        | 132        | 902        | 204        | 560        | 151        |
| Ethylamine                                         | C2H7N           | 0.164         | 191        | 7.426        | 237        | 0.08         | 218        | 646        | 180        | 0.744         | -0.277        | 107        | 753        | 149        | 562        | 152        |
| Pyrimethamine                                      | C12H13ClN4      | 0.190         | 193        | 7.131        | 208        | 0.23         | 55         | 456        | 94         | 2.085         | -0.466        | 300        | 756        | 150        | 563        | 153        |
| 1,2-bis(4-Pyridyl)ethane                           | C12H10N2        | 2.272         | 431        | 4.712        | 33         | 0.03         | 257        | 721        | 230        | 1.687         | -0.354        | 275        | 996        | 256        | 565        | 154        |
| Thiourea                                           | CH4N2S          | 0.123         | 184        | 8.165        | 308        | 0.18         | 112        | 604        | 163        | 0.947         | -0.584        | 146        | 750        | 147        | 566        | 155        |
| Pyromellitic                                       | C10H2O6         | 3.566         | 450        | 6.094        | 109        | -0.07        | 331        | 890        | 358        | 0.872         | -0.148        | 127        | 1017       | 275        | 567        | 156        |
| Levulinic acid                                     | C5H8O3          | 1.062         | 322        | 6.477        | 152        | 0.13         | 166        | 640        | 177        | 1.526         | -1.025        | 250        | 890        | 195        | 568        | 157        |
| <b>Hexano<sup>CSD</sup></b>                        | <b>C6H14O</b>   | <b>-0.090</b> | <b>155</b> | <b>4.840</b> | <b>40</b>  | <b>0.13</b>  | <b>164</b> | <b>359</b> | <b>60</b>  | <b>3.078</b>  | <b>0.017</b>  | <b>365</b> | <b>724</b> | <b>138</b> | <b>569</b> | <b>158</b> |
| 2,4-Dimethylpyridine                               | C7H9N           | 1.356         | 370        | 6.436        | 145        | -0.07        | 322        | 837        | 324        | 0.693         | -0.328        | 102        | 939        | 220        | 569        | 159        |
| Phenylmethanol                                     | C7H8O           | -0.033        | 163        | 7.173        | 210        | 0.07         | 228        | 601        | 162        | 0.912         | -0.619        | 131        | 732        | 143        | 569        | 160        |
| <b>1,4-Dioxane<sup>CSD</sup></b>                   | <b>C4H8O2</b>   | <b>1.357</b>  | <b>371</b> | <b>8.300</b> | <b>323</b> | <b>0.19</b>  | <b>97</b>  | <b>791</b> | <b>292</b> | <b>0.960</b>  | <b>-0.060</b> | <b>150</b> | <b>941</b> | <b>223</b> | <b>570</b> | <b>161</b> |

|                                                  |                 |               |            |              |            |             |            |            |            |              |               |            |             |            |            |            |
|--------------------------------------------------|-----------------|---------------|------------|--------------|------------|-------------|------------|------------|------------|--------------|---------------|------------|-------------|------------|------------|------------|
| (-)-Epicedrol                                    | C15H26O         | -0.244        | 129        | 7.754        | 274        | 0.19        | 95         | 498        | 118        | 1.189        | 0.169         | 207        | 705         | 124        | 576        | 162        |
| <b>Heptano<sup>CSD</sup></b>                     | <b>C7H16O</b>   | <b>-0.128</b> | <b>147</b> | <b>4.563</b> | <b>29</b>  | <b>0.13</b> | <b>163</b> | <b>339</b> | <b>54</b>  | <b>3.569</b> | <b>-0.003</b> | <b>386</b> | <b>725</b>  | <b>139</b> | <b>578</b> | <b>163</b> |
| <b>Malonic acid</b>                              | <b>C3H4O4</b>   | <b>-0.293</b> | <b>114</b> | <b>7.579</b> | <b>257</b> | <b>0.11</b> | <b>189</b> | <b>560</b> | <b>140</b> | <b>0.914</b> | <b>-1.637</b> | <b>133</b> | <b>693</b>  | <b>116</b> | <b>579</b> | <b>164</b> |
| [1,1'-Binaphthalene]-2,2'-diol                   | C20H14O2        | -0.276        | 120        | 7.458        | 246        | -0.08       | 332        | 698        | 217        | -4.436       | -6.477        | 1          | 699         | 122        | 579        | 165        |
| Heptanoic acid                                   | C7H14O2         | -0.081        | 158        | 4.791        | 38         | 0.09        | 209        | 405        | 76         | 2.534        | -1.037        | 336        | 741         | 144        | 583        | 166        |
| <b>Octano<sup>CSD</sup></b>                      | <b>C8H18O</b>   | <b>-0.165</b> | <b>140</b> | <b>4.259</b> | <b>21</b>  | <b>0.13</b> | <b>168</b> | <b>329</b> | <b>48</b>  | <b>4.074</b> | <b>-0.008</b> | <b>395</b> | <b>724</b>  | <b>137</b> | <b>584</b> | <b>167</b> |
| Tetrathiafulvalene                               | C6H4S4          | 0.708         | 256        | 4.400        | 25         | -0.43       | 439        | 720        | 226        | 0.819        | -0.201        | 121        | 841         | 172        | 585        | 168        |
| 2,6-Dimethylpyridine                             | C7H9N           | 1.126         | 336        | 6.503        | 153        | -0.07       | 323        | 812        | 306        | 0.762        | -0.258        | 109        | 921         | 211        | 585        | 169        |
| Phenazine                                        | C12H8N2         | 1.750         | 413        | 4.758        | 37         | -0.26       | 399        | 849        | 332        | 0.961        | -0.059        | 151        | 1000        | 258        | 587        | 170        |
| 2,8,16,20-Tetramethylcalix(4)resorcinarene       | C32H32O8        | 2.693         | 443        | 8.287        | 322        | 0.03        | 260        | 1025       | 421        | -3.163       | -7.755        | 7          | 1032        | 284        | 589        | 171        |
| Butan-2-ol                                       | C4H10O          | -0.333        | 105        | 7.443        | 241        | 0.17        | 119        | 465        | 104        | 1.433        | -0.097        | 231        | 696         | 119        | 591        | 172        |
| N-Methylpyrrolidone                              | C5H9NO          | 1.416         | 379        | 7.601        | 261        | 0.05        | 240        | 880        | 354        | 0.595        | -0.426        | 91         | 971         | 242        | 592        | 173        |
| <b>Citric acid</b>                               | <b>C6H8O7</b>   | <b>-0.400</b> | <b>96</b>  | <b>8.113</b> | <b>301</b> | <b>0.22</b> | <b>63</b>  | <b>460</b> | <b>98</b>  | <b>1.427</b> | <b>-3.675</b> | <b>229</b> | <b>689</b>  | <b>114</b> | <b>593</b> | <b>174</b> |
| Octanoic acid                                    | C8H16O2         | -0.117        | 150        | 4.557        | 28         | 0.10        | 201        | 379        | 70         | 3.053        | -1.029        | 364        | 743         | 146        | 593        | 175        |
| Cyclamic acid                                    | C6H13NO3S       | -0.932        | 41         | 7.157        | 209        | -0.07       | 324        | 574        | 147        | 0.189        | -1.851        | 61         | 635         | 86         | 594        | 176        |
| 2,5-Dimethylpyrazine                             | C6H8N2          | 2.130         | 425        | 6.180        | 119        | -0.12       | 362        | 906        | 372        | 0.780        | -0.241        | 114        | 1020        | 277        | 595        | 177        |
| 1,1-bis(4-Hydroxyphenyl)cyclohexane              | C18H20O2        | -0.253        | 127        | 7.879        | 283        | -0.03       | 288        | 698        | 218        | -1.665       | -4.216        | 24         | 722         | 136        | 595        | 178        |
| Cinnamaldehyde                                   | C9H8O           | 1.451         | 383        | 4.875        | 41         | -0.04       | 299        | 723        | 234        | 1.602        | 0.071         | 256        | 979         | 246        | 596        | 179        |
| 1,2,4,5-Tetracyanobenzene                        | C10H2N4         | 2.616         | 441        | 5.652        | 76         | -0.04       | 298        | 815        | 308        | 1.390        | 0.369         | 225        | 1040        | 287        | 599        | 180        |
| cis,cis-1,3,5-Cyclohexanetricarboxylic acid      | C9H12O6         | -0.996        | 26         | 8.011        | 294        | 0.10        | 198        | 518        | 125        | 0.748        | -2.824        | 108        | 626         | 85         | 600        | 181        |
| 2,6-Di-tert-butyl-4-methylphenol                 | C15H24O         | -1.126        | 7          | 7.211        | 213        | -0.08       | 333        | 553        | 136        | -0.052       | -1.072        | 55         | 608         | 78         | 601        | 182        |
| 2,3,5,6-Tetrachlorocyclohexa-2,5-diene-1,4-dione | C6Cl4O2         | 2.255         | 430        | 6.172        | 118        | 0.02        | 271        | 819        | 312        | 1.234        | 0.214         | 213        | 1032        | 283        | 602        | 183        |
| 2-Aminopyrimidine                                | C4H5N3          | 0.727         | 263        | 7.052        | 198        | 0.02        | 265        | 726        | 236        | 0.938        | -0.083        | 141        | 867         | 181        | 604        | 184        |
| <b>Saccharin<sup>CSD</sup></b>                   | <b>C7H5NO3S</b> | <b>1.674</b>  | <b>406</b> | <b>8.475</b> | <b>337</b> | <b>0.10</b> | <b>202</b> | <b>945</b> | <b>388</b> | <b>0.286</b> | <b>-0.734</b> | <b>71</b>  | <b>1016</b> | <b>274</b> | <b>610</b> | <b>185</b> |
| Tetramethylpyrazine                              | C8H12N2         | 1.496         | 392        | 6.659        | 169        | -0.09       | 347        | 908        | 373        | 0.625        | -0.396        | 95         | 1003        | 263        | 611        | 186        |
| Furfural                                         | C6H12O2         | 1.545         | 399        | 6.762        | 177        | -0.01       | 284        | 860        | 340        | 0.969        | -0.051        | 152        | 1012        | 270        | 613        | 187        |
| Nonanoic acid                                    | C9H18O2         | -0.124        | 148        | 4.256        | 20         | 0.09        | 211        | 379        | 71         | 3.598        | -0.994        | 387        | 766         | 154        | 618        | 188        |
| Pyruvic acid                                     | C3H4O3          | 1.242         | 354        | 8.233        | 315        | 0.04        | 254        | 923        | 380        | -0.237       | -1.768        | 49         | 972         | 244        | 618        | 189        |
| <b>Cinnamide</b>                                 | <b>C9H9NO</b>   | <b>-1.134</b> | <b>4</b>   | <b>5.686</b> | <b>80</b>  | <b>0.04</b> | <b>252</b> | <b>336</b> | <b>51</b>  | <b>1.939</b> | <b>-0.101</b> | <b>287</b> | <b>623</b>  | <b>83</b>  | <b>619</b> | <b>190</b> |
| <b>Benzamide</b>                                 | <b>C7H7NO</b>   | <b>-0.782</b> | <b>58</b>  | <b>6.168</b> | <b>117</b> | <b>0.03</b> | <b>259</b> | <b>434</b> | <b>88</b>  | <b>1.518</b> | <b>-0.013</b> | <b>243</b> | <b>677</b>  | <b>107</b> | <b>619</b> | <b>191</b> |
| Decanoic acid                                    | C10H20O2        | -0.177        | 138        | 4.031        | 15         | 0.09        | 208        | 361        | 61         | 4.160        | -0.942        | 397        | 758         | 151        | 620        | 192        |
| <b>Picric acid<sup>CSD</sup></b>                 | <b>C6H3N3O7</b> | <b>2.341</b>  | <b>435</b> | <b>7.982</b> | <b>293</b> | <b>0.03</b> | <b>262</b> | <b>990</b> | <b>410</b> | <b>0.276</b> | <b>-2.275</b> | <b>69</b>  | <b>1059</b> | <b>300</b> | <b>624</b> | <b>193</b> |

|                                                         |                 |               |            |              |            |              |            |            |            |              |               |            |             |            |            |            |
|---------------------------------------------------------|-----------------|---------------|------------|--------------|------------|--------------|------------|------------|------------|--------------|---------------|------------|-------------|------------|------------|------------|
| 4-Aminobenzamide                                        | C7H8N2O         | -0.536        | 80         | 6.078        | 107        | 0.05         | 239        | 426        | 85         | 1.781        | -0.260        | 278        | 704         | 123        | 624        | 194        |
| <b>Theophylline</b>                                     | <b>C7H8N4O2</b> | <b>1.486</b>  | <b>389</b> | <b>7.517</b> | <b>249</b> | <b>0.07</b>  | <b>229</b> | <b>867</b> | <b>347</b> | <b>0.948</b> | <b>-0.072</b> | <b>147</b> | <b>1014</b> | <b>272</b> | <b>625</b> | <b>195</b> |
| <b>Sorbic acid</b>                                      | <b>C6H8O2</b>   | <b>0.027</b>  | <b>174</b> | <b>5.269</b> | <b>55</b>  | <b>-0.19</b> | <b>384</b> | <b>613</b> | <b>165</b> | <b>1.115</b> | <b>-0.925</b> | <b>187</b> | <b>800</b>  | <b>160</b> | <b>626</b> | <b>196</b> |
| <b>1,3-Diiodobenzene<sup>CSD</sup></b>                  | <b>C6H4I2</b>   | <b>0.727</b>  | <b>264</b> | <b>5.209</b> | <b>51</b>  | <b>-0.40</b> | <b>427</b> | <b>742</b> | <b>251</b> | <b>0.971</b> | <b>-0.050</b> | <b>156</b> | <b>898</b>  | <b>202</b> | <b>634</b> | <b>197</b> |
| 1-Amino-1-methylcyclopropane                            | C4H9N           | -0.089        | 156        | 8.235        | 316        | 0.08         | 214        | 686        | 207        | 0.727        | -0.293        | 106        | 792         | 159        | 636        | 198        |
| 4-Benzoquinone                                          | C6H4O2          | 2.639         | 442        | 6.037        | 104        | -0.14        | 368        | 914        | 377        | 1.034        | 0.013         | 165        | 1079        | 315        | 637        | 199        |
| 2-Pyridone                                              | C5H5NO          | 0.714         | 258        | 6.683        | 172        | -0.03        | 289        | 719        | 225        | 1.091        | 0.071         | 176        | 895         | 200        | 637        | 200        |
| 1-Pentanol                                              | C5H12O          | 0.382         | 211        | 5.362        | 58         | 0.04         | 248        | 517        | 124        | 2.532        | -0.019        | 335        | 852         | 177        | 641        | 201        |
| 1,13-Tridecanediol                                      | C13H28O2        | -1.019        | 20         | 4.117        | 17         | 0.11         | 183        | 220        | 13         | 7.620        | -0.033        | 442        | 662         | 100        | 642        | 202        |
| Indomethacin                                            | C19H16ClNO4     | 1.096         | 331        | 6.656        | 168        | 0.11         | 188        | 687        | 210        | 1.931        | -1.640        | 286        | 973         | 245        | 642        | 203        |
| Benzoin                                                 | C14H12O2        | 0.608         | 231        | 7.326        | 227        | 0.17         | 118        | 576        | 149        | 2.062        | -0.489        | 297        | 873         | 188        | 642        | 204        |
| Acetophenone                                            | C8H8O           | 1.271         | 361        | 5.804        | 87         | -0.18        | 381        | 829        | 319        | 1.094        | 0.073         | 177        | 1006        | 265        | 645        | 205        |
| iso-Deoxycholic acid                                    | C24H40O4        | -0.218        | 133        | 6.370        | 137        | 0.15         | 140        | 410        | 81         | 3.127        | -0.955        | 369        | 779         | 158        | 646        | 206        |
| 4,4,7-Trimethyldecahydro-1H-cyclopenta[cd]inden-7-ol    | C14H24O         | -0.625        | 70         | 7.680        | 267        | 0.11         | 192        | 529        | 130        | 1.132        | 0.111         | 190        | 719         | 135        | 649        | 207        |
| 1,1-Dihydroxypropan-2-one                               | C3H6O3          | 0.841         | 288        | 7.848        | 281        | 0.10         | 199        | 768        | 275        | 1.045        | -0.996        | 169        | 937         | 219        | 649        | 208        |
| <b>Vanillin</b>                                         | <b>C8H8O3</b>   | <b>0.668</b>  | <b>243</b> | <b>7.240</b> | <b>215</b> | <b>-0.03</b> | <b>297</b> | <b>755</b> | <b>265</b> | <b>0.937</b> | <b>-1.104</b> | <b>139</b> | <b>894</b>  | <b>199</b> | <b>651</b> | <b>209</b> |
| 1,2-Dichloroethane                                      | C2H4Cl2         | 0.690         | 250        | 5.254        | 54         | -0.42        | 437        | 741        | 248        | 1.011        | -0.010        | 161        | 902         | 203        | 652        | 210        |
| (E)-4-(4-Hydroxy-3-methoxyphenyl)but-3-en-2-one         | C11H12O3        | 0.770         | 275        | 6.232        | 122        | 0.04         | 246        | 643        | 178        | 1.873        | -0.678        | 284        | 927         | 215        | 652        | 211        |
| 1-(Naphthalen-2-yl)Ethan-1-One                          | C12H10O         | 1.236         | 353        | 5.381        | 60         | -0.30        | 408        | 821        | 314        | 1.114        | 0.093         | 186        | 1007        | 268        | 654        | 212        |
| 3β,12β-Dihydroxy-5β-cholan-24-oic acid                  | C24H40O4        | -0.393        | 97         | 6.802        | 179        | 0.18         | 107        | 383        | 72         | 3.127        | -0.955        | 368        | 751         | 148        | 654        | 213        |
| 2,2'-(cyclohexa-2,5-diene-1,4-diylidene)dimalononitrile | C12H4N4         | 2.505         | 439        | 5.109        | 48         | -0.16        | 377        | 864        | 343        | 1.428        | 0.408         | 230        | 1094        | 325        | 655        | 214        |
| <b>Dichloromethane<sup>CSD</sup></b>                    | <b>CH2Cl2</b>   | <b>0.593</b>  | <b>226</b> | <b>6.154</b> | <b>115</b> | <b>-0.46</b> | <b>444</b> | <b>785</b> | <b>285</b> | <b>0.683</b> | <b>-0.337</b> | <b>98</b>  | <b>883</b>  | <b>190</b> | <b>657</b> | <b>215</b> |
| <b>Hippuric acid</b>                                    | <b>C9H9NO3</b>  | <b>-0.808</b> | <b>55</b>  | <b>6.682</b> | <b>171</b> | <b>0.11</b>  | <b>187</b> | <b>413</b> | <b>82</b>  | <b>2.087</b> | <b>-0.975</b> | <b>301</b> | <b>714</b>  | <b>131</b> | <b>659</b> | <b>216</b> |
| L-Lysine                                                | C6H14N2O2       | -1.100        | 9          | 6.458        | 149        | 0.19         | 104        | 262        | 27         | 4.615        | 0.023         | 406        | 668         | 103        | 659        | 217        |
| Terephthalaldehyde                                      | C8H6O2          | 2.021         | 421        | 5.099        | 47         | -0.10        | 355        | 823        | 316        | 1.608        | 0.078         | 259        | 1082        | 317        | 661        | 218        |
| Phenylmethanethiol                                      | C7H8S           | -0.134        | 146        | 6.504        | 154        | 0.02         | 266        | 566        | 144        | 1.495        | -0.036        | 241        | 807         | 164        | 661        | 219        |
| Coumarin                                                | C9H6O2          | 1.371         | 374        | 6.070        | 106        | -0.19        | 383        | 863        | 342        | 1.066        | 0.046         | 173        | 1036        | 285        | 662        | 220        |
| n-Hexadecanol                                           | C16H34O         | -0.303        | 110        | 3.264        | 2          | 0.08         | 219        | 331        | 49         | 8.401        | 0.237         | 443        | 774         | 157        | 664        | 221        |
| D-Lysine                                                | C6H14N2O2       | -0.919        | 43         | 6.539        | 156        | 0.19         | 103        | 302        | 38         | 4.615        | 0.023         | 405        | 707         | 127        | 664        | 222        |
| Tryphenylphosphine oxide                                | C18H15OP        | 1.719         | 409        | 8.465        | 335        | 0.21         | 79         | 823        | 317        | 1.547        | -0.494        | 251        | 1074        | 310        | 665        | 223        |
| 1,3-Di(pyridin-4-yl)propane                             | C13H14N2        | 2.183         | 426        | 6.159        | 116        | 0.04         | 247        | 789        | 288        | 2.116        | -0.435        | 305        | 1094        | 324        | 668        | 224        |
| Benzalacetone                                           | C10H10O         | 1.259         | 357        | 5.023        | 46         | -0.15        | 371        | 774        | 279        | 1.586        | 0.056         | 254        | 1028        | 280        | 671        | 225        |

|                                                             |                 |              |            |              |            |              |            |            |            |              |              |            |             |            |            |            |
|-------------------------------------------------------------|-----------------|--------------|------------|--------------|------------|--------------|------------|------------|------------|--------------|--------------|------------|-------------|------------|------------|------------|
| <b>Nicotinamide</b>                                         | <b>C6H6N2O</b>  | <b>0.978</b> | <b>312</b> | <b>6.129</b> | <b>113</b> | <b>-0.03</b> | <b>296</b> | <b>721</b> | <b>228</b> | <b>1.626</b> | <b>0.096</b> | <b>265</b> | <b>986</b>  | <b>251</b> | <b>674</b> | <b>226</b> |
| <b>Uracil</b>                                               | <b>C4H4N2O2</b> | <b>0.877</b> | <b>296</b> | <b>7.766</b> | <b>275</b> | <b>0.06</b>  | <b>236</b> | <b>807</b> | <b>299</b> | <b>1.031</b> | <b>0.010</b> | <b>164</b> | <b>971</b>  | <b>241</b> | <b>675</b> | <b>227</b> |
| 1,4-Dimethylpiperazine                                      | C6H14N2         | 1.910        | 416        | 6.715        | 174        | -0.24        | 398        | 988        | 409        | 0.715        | -0.306       | 104        | 1092        | 322        | 676        | 228        |
| Tetraiodoethene                                             | C2I4            | 0.747        | 269        | 6.300        | 127        | -0.34        | 422        | 818        | 311        | 0.897        | -0.123       | 128        | 946         | 224        | 677        | 229        |
| Scyllo-inositol                                             | C6H12O6         | 0.951        | 308        | 8.393        | 329        | 0.38         | 11         | 648        | 184        | 2.551        | -1.020       | 337        | 985         | 249        | 677        | 230        |
| Methanol                                                    | CH4O            | 0.002        | 171        | 9.201        | 386        | 0.12         | 176        | 733        | 245        | 0.810        | -0.210       | 118        | 851         | 175        | 680        | 231        |
| Piperine                                                    | C17H19NO3       | 1.458        | 385        | 5.483        | 66         | 0.00         | 282        | 733        | 246        | 2.528        | -0.023       | 334        | 1067        | 305        | 682        | 232        |
| $\alpha$ -L-Xylopyranose                                    | C5H10O5         | 0.140        | 188        | 8.780        | 362        | 0.22         | 72         | 622        | 168        | 1.524        | -1.027       | 248        | 870         | 183        | 682        | 233        |
| 2-Methoxynaphthalene                                        | C11H10O         | 0.720        | 262        | 5.485        | 67         | -0.38        | 425        | 754        | 262        | 1.144        | 0.123        | 193        | 947         | 225        | 685        | 234        |
| Piperidine                                                  | C5H11N          | 0.735        | 267        | 7.801        | 276        | 0.02         | 267        | 810        | 302        | 0.939        | -0.081       | 142        | 952         | 229        | 685        | 235        |
| $\alpha$ -8'- $\beta$ -Apocarotenal                         | C30H40O         | 0.929        | 302        | 4.583        | 30         | 0.05         | 244        | 576        | 148        | 5.519        | 0.417        | 415        | 991         | 255        | 689        | 236        |
| Allitol                                                     | C6H14O6         | 0.718        | 259        | 7.102        | 206        | 0.22         | 61         | 526        | 129        | 5.678        | -0.445       | 424        | 950         | 227        | 691        | 237        |
| 13-epi-Sclareol                                             | C20H36O2        | -0.987       | 28         | 7.576        | 254        | 0.21         | 74         | 356        | 59         | 2.957        | -0.614       | 363        | 719         | 134        | 691        | 238        |
| D-Glucono-1,5-lactone                                       | C6H10O6         | -0.846       | 50         | 8.693        | 356        | 0.25         | 42         | 448        | 93         | 2.053        | -1.008       | 294        | 742         | 145        | 692        | 239        |
| $\beta$ -8'- $\beta$ -Apocarotenal                          | C30H40O         | 0.946        | 307        | 4.469        | 27         | 0.04         | 255        | 589        | 155        | 5.519        | 0.417        | 416        | 1005        | 264        | 698        | 240        |
| <b>Theobromine</b>                                          | <b>C7H8N4O2</b> | <b>2.079</b> | <b>423</b> | <b>7.263</b> | <b>220</b> | <b>-0.05</b> | <b>311</b> | <b>954</b> | <b>395</b> | <b>1.041</b> | <b>0.020</b> | <b>168</b> | <b>1122</b> | <b>346</b> | <b>699</b> | <b>241</b> |
| 2-Ethyl-3-hydroxy-4H-pyran-4-one                            | C7H8O3          | 0.641        | 241        | 7.554        | 253        | 0.06         | 233        | 727        | 237        | 1.245        | -0.286       | 214        | 941         | 222        | 700        | 242        |
| $\alpha$ -D-Tagatopyranose                                  | C5H6O3          | 0.850        | 290        | 8.940        | 373        | 0.23         | 58         | 721        | 229        | 1.639        | -1.933       | 269        | 990         | 254        | 700        | 243        |
| 1,11-Undecanediol                                           | C11H24O2        | -1.073       | 15         | 4.453        | 26         | 0.05         | 238        | 279        | 31         | 6.559        | -0.074       | 437        | 716         | 132        | 701        | 244        |
| Cholic acid                                                 | C24H40O5        | -0.151       | 142        | 7.578        | 255        | 0.22         | 62         | 459        | 97         | 3.538        | -1.053       | 385        | 844         | 173        | 702        | 245        |
| S(+)-Camphor-10-sulfonic acid                               | C10H16O4S       | 1.176        | 349        | 8.873        | 367        | 0.02         | 269        | 985        | 407        | 0.250        | -1.791       | 66         | 1051        | 294        | 702        | 246        |
| $\alpha$ -L-Sorbopyranose                                   | C6H12O6         | 0.746        | 268        | 9.048        | 376        | 0.23         | 59         | 703        | 220        | 1.639        | -1.933       | 268        | 971         | 240        | 703        | 247        |
| 1,1,6,6-Tetraphenylhexa-2,4-diyne-1,6-diol                  | C30H22O2        | -0.400       | 95         | 6.645        | 167        | -0.07        | 321        | 583        | 152        | 1.380        | -2.191       | 224        | 807         | 165        | 712        | 248        |
| Chlorine                                                    | Cl2             | 1.001        | 315        | 5.462        | 64         | -0.40        | 430        | 809        | 300        | 1.289        | 0.268        | 220        | 1029        | 281        | 714        | 249        |
| Methyl acetate                                              | C3H6O2          | 1.144        | 340        | 7.456        | 244        | -0.05        | 310        | 894        | 362        | 1.020        | 0.000        | 162        | 1056        | 297        | 716        | 250        |
| cis-anti-cis-Dicyclohexano-18-crown-6                       | C20H36O6        | 2.241        | 428        | 6.087        | 108        | -0.31        | 412        | 948        | 389        | 1.152        | 0.131        | 197        | 1145        | 357        | 717        | 251        |
| Benzophenone                                                | C13H10O         | 1.128        | 337        | 5.464        | 65         | -0.21        | 388        | 790        | 289        | 1.639        | 0.108        | 266        | 1056        | 296        | 719        | 252        |
| 3,4-(Methylenedioxy)benzaldehyde                            | C8H6O3          | 1.560        | 400        | 6.451        | 148        | -0.28        | 404        | 952        | 393        | 1.035        | 0.014        | 167        | 1119        | 342        | 719        | 253        |
| 2-Methylpropan-2-ol                                         | C4H10O          | -0.438       | 89         | 9.371        | 394        | 0.12         | 182        | 665        | 194        | 0.940        | -0.080       | 143        | 808         | 166        | 719        | 254        |
| <b>1,2,4,5-Tetrafluoro-3,6-di-iodobenzene<sup>CSP</sup></b> | <b>C6F4I2</b>   | <b>0.682</b> | <b>248</b> | <b>4.817</b> | <b>39</b>  | <b>-0.41</b> | <b>434</b> | <b>721</b> | <b>231</b> | <b>1.525</b> | <b>0.505</b> | <b>249</b> | <b>970</b>  | <b>238</b> | <b>722</b> | <b>255</b> |
| Imidazole                                                   | C3H4N2          | 0.259        | 199        | 7.750        | 271        | 0.00         | 281        | 751        | 259        | 1.050        | 0.030        | 170        | 921         | 210        | 722        | 256        |
| Dihydrofuran-2,5-dione                                      | C4H4O3          | 2.124        | 424        | 7.940        | 287        | 0.08         | 220        | 931        | 383        | 1.255        | 0.234        | 215        | 1146        | 359        | 722        | 257        |
| 2,3-Dimethylpyrazine                                        | C6H8N2          | 2.044        | 422        | 7.530        | 251        | -0.12        | 361        | 1034       | 424        | 0.771        | -0.250       | 111        | 1145        | 358        | 723        | 258        |

|                                                      |                  |               |            |              |            |              |            |             |            |              |               |            |             |            |            |            |
|------------------------------------------------------|------------------|---------------|------------|--------------|------------|--------------|------------|-------------|------------|--------------|---------------|------------|-------------|------------|------------|------------|
| 1,4-Diazabicyclo[2.2.2]octane                        | C6H12N2          | 2.301         | 433        | 8.696        | 357        | -0.05        | 306        | 1096        | 441        | 0.134        | -0.886        | 60         | 1156        | 369        | 723        | 259        |
| <b>Isonicotinamide</b>                               | <b>C6H6N2O</b>   | <b>1.034</b>  | <b>319</b> | <b>6.342</b> | <b>131</b> | <b>-0.08</b> | <b>337</b> | <b>787</b>  | <b>287</b> | <b>1.603</b> | <b>0.072</b>  | <b>257</b> | <b>1044</b> | <b>290</b> | <b>725</b> | <b>260</b> |
| Dimethylsulfide                                      | C2H6S            | 0.638         | 240        | 5.896        | 95         | -0.41        | 436        | 771         | 278        | 1.149        | 0.129         | 195        | 966         | 237        | 726        | 261        |
| Melamine                                             | C3H6N6           | 1.283         | 362        | 7.972        | 292        | 0.12         | 175        | 829         | 320        | 1.609        | -0.432        | 260        | 1089        | 320        | 727        | 262        |
| 1-Hydroxypropan-2-one                                | C3H6O2           | 1.170         | 346        | 7.814        | 279        | 0.08         | 215        | 840         | 326        | 1.453        | -0.078        | 234        | 1074        | 311        | 728        | 263        |
| neo-Inositol                                         | C6H12O6          | 1.418         | 380        | 8.894        | 371        | 0.37         | 13         | 764         | 271        | 2.551        | -1.020        | 344        | 1108        | 330        | 728        | 264        |
| Dimethylsulfoxide                                    | C2H6OS           | 2.003         | 419        | 8.152        | 304        | -0.08        | 335        | 1058        | 429        | 0.572        | -0.448        | 90         | 1148        | 362        | 729        | 265        |
| (1R,2S)-2-Methyl-4-oxocyclohexane-1-carboxylic acid  | C8H12O3          | 1.092         | 329        | 8.340        | 326        | 0.13         | 155        | 810         | 301        | 1.581        | 0.050         | 253        | 1063        | 304        | 734        | 266        |
| <b>Toluene<sup>CSD</sup></b>                         | <b>C7H8</b>      | <b>0.575</b>  | <b>224</b> | <b>5.631</b> | <b>75</b>  |              | <b>450</b> | <b>749</b>  | <b>257</b> | <b>1.230</b> | <b>0.210</b>  | <b>212</b> | <b>961</b>  | <b>233</b> | <b>737</b> | <b>267</b> |
| 2,3,5,6-Tetrafluoro-7,7,8,8-tetracyanoquinodimethane | C12F4N4          | 2.505         | 440        | 4.922        | 42         | -0.24        | 396        | 878         | 350        | 2.075        | 1.054         | 299        | 1177        | 379        | 737        | 268        |
| <b>Piperazine</b>                                    | <b>C4H10N2</b>   | <b>0.769</b>  | <b>274</b> | <b>8.244</b> | <b>318</b> | <b>0.03</b>  | <b>263</b> | <b>855</b>  | <b>337</b> | <b>0.998</b> | <b>-0.022</b> | <b>160</b> | <b>1015</b> | <b>273</b> | <b>741</b> | <b>269</b> |
| DL-Mannitol                                          | C6H14O6          | 1.008         | 316        | 7.605        | 262        | 0.24         | 48         | 626         | 172        | 5.678        | -0.445        | 431        | 1057        | 298        | 741        | 270        |
| Galactitol                                           | C6H14O6          | 0.963         | 311        | 7.066        | 199        | 0.17         | 120        | 630         | 173        | 5.678        | -0.445        | 425        | 1055        | 295        | 744        | 271        |
| <b>Caffeine</b>                                      | <b>C8H10N4O2</b> | <b>2.353</b>  | <b>436</b> | <b>7.293</b> | <b>225</b> | <b>-0.13</b> | <b>365</b> | <b>1026</b> | <b>422</b> | <b>0.971</b> | <b>-0.050</b> | <b>155</b> | <b>1181</b> | <b>382</b> | <b>745</b> | <b>272</b> |
| epi-Inositol                                         | C6H12O6          | 1.067         | 324        | 9.388        | 395        | 0.38         | 12         | 731         | 242        | 2.551        | -1.020        | 339        | 1070        | 309        | 746        | 273        |
| Phthalide                                            | C8H6O2           | 1.342         | 369        | 7.071        | 200        | -0.12        | 363        | 932         | 384        | 1.109        | 0.089         | 184        | 1116        | 336        | 747        | 274        |
| 1-(4-Methoxyphenyl)ethan-1-one                       | C9H10O2          | 1.361         | 372        | 5.805        | 88         | -0.27        | 402        | 862         | 341        | 1.604        | 0.073         | 258        | 1120        | 343        | 748        | 275        |
| 2,3-Butanedione                                      | C4H6O2           | 1.992         | 417        | 6.855        | 181        | -0.17        | 378        | 976         | 405        | 1.120        | 0.100         | 189        | 1165        | 375        | 748        | 276        |
| Nootkatone                                           | C15H22O          | 1.397         | 375        | 6.888        | 183        | -0.31        | 413        | 971         | 403        | 0.969        | -0.051        | 153        | 1124        | 347        | 749        | 277        |
| DL-Ribose                                            | C5H10O5          | 0.046         | 176        | 8.779        | 360        | 0.29         | 25         | 561         | 141        | 3.083        | -1.509        | 366        | 927         | 214        | 751        | 278        |
| <b>Propionamide</b>                                  | <b>C3H7NO</b>    | <b>-1.126</b> | <b>8</b>   | <b>7.482</b> | <b>247</b> | <b>0.05</b>  | <b>242</b> | <b>497</b>  | <b>116</b> | <b>1.625</b> | <b>0.095</b>  | <b>264</b> | <b>761</b>  | <b>152</b> | <b>753</b> | <b>279</b> |
| Chloroform                                           | CHCl3            | 0.604         | 229        | 7.275        | 222        | -0.48        | 449        | 900         | 370        | 0.481        | -0.539        | 85         | 985         | 250        | 756        | 280        |
| $\alpha$ -D-Galactose                                | C6H12O6          | 0.312         | 205        | 8.877        | 368        | 0.22         | 71         | 644         | 179        | 2.232        | -1.340        | 318        | 962         | 234        | 757        | 281        |
| 3-Isochromanone                                      | C9H8O2           | 1.329         | 367        | 7.250        | 217        | -0.11        | 356        | 940         | 386        | 1.111        | 0.091         | 185        | 1125        | 348        | 758        | 282        |
| Cyclohexanone                                        | C4H8             | 1.525         | 394        | 7.641        | 266        | -0.09        | 345        | 1005        | 414        | 0.958        | -0.062        | 149        | 1154        | 366        | 760        | 283        |
| Xylitol                                              | C5H12O5          | 0.246         | 198        | 8.150        | 303        | 0.23         | 57         | 558         | 139        | 4.590        | -0.512        | 402        | 960         | 232        | 762        | 284        |
| Cyclohexane-1,2,3,4,5,6-hexol                        | C6H12O6          | 1.289         | 363        | 9.723        | 404        | 0.35         | 15         | 782         | 283        | 2.551        | -1.020        | 346        | 1128        | 349        | 765        | 285        |
| <b>L-Arginine</b>                                    | <b>C6H14N4O2</b> | <b>1.693</b>  | <b>408</b> | <b>7.091</b> | <b>203</b> | <b>0.14</b>  | <b>150</b> | <b>761</b>  | <b>268</b> | <b>5.192</b> | <b>0.090</b>  | <b>413</b> | <b>1174</b> | <b>377</b> | <b>766</b> | 286        |
| Lidocaine                                            | C18H32O2         | 0.117         | 183        | 6.530        | 155        | 0.07         | 224        | 562         | 142        | 3.640        | 0.068         | 388        | 950         | 228        | 767        | 287        |
| L-chiro-Inositol                                     | C6H12O6          | 0.682         | 247        | 10.289       | 418        | 0.41         | 9          | 674         | 200        | 2.551        | -1.020        | 340        | 1014        | 271        | 767        | 288        |
| 1,4-Dimethoxybenzene                                 | C8H10O2          | 0.870         | 294        | 5.293        | 56         | -0.41        | 435        | 785         | 286        | 1.704        | 0.173         | 277        | 1062        | 303        | 768        | 289        |
| D-(+)-chiro-Inositol                                 | C6H12O6          | 1.526         | 395        | 10.312       | 419        | 0.43         | 6          | 820         | 313        | 2.551        | -1.020        | 343        | 1163        | 373        | 768        | 290        |
| 4-Methoxybenzaldehyde                                | C8H8O2           | 1.449         | 382        | 5.962        | 97         | -0.31        | 411        | 890         | 360        | 1.625        | 0.094         | 263        | 1153        | 365        | 771        | 291        |

|                                                               |                 |               |            |              |            |              |            |            |            |              |               |            |             |            |            |            |
|---------------------------------------------------------------|-----------------|---------------|------------|--------------|------------|--------------|------------|------------|------------|--------------|---------------|------------|-------------|------------|------------|------------|
| $\beta$ -D-Glucose                                            | C6H12O6         | 0.124         | 185        | 9.069        | 378        | 0.22         | 73         | 636        | 175        | 2.232        | -1.340        | 321        | 957         | 231        | 772        | 292        |
| Ethyl Propionate                                              | C5H10O2         | 0.995         | 314        | 5.665        | 78         | -0.27        | 400        | 792        | 294        | 2.061        | 0.020         | 296        | 1088        | 319        | 774        | 293        |
| cis-Inositol                                                  | C6H12O6         | 0.699         | 252        | 10.455       | 424        | 0.42         | 8          | 684        | 206        | 2.551        | -1.020        | 342        | 1026        | 279        | 774        | 294        |
| (1S,6R,10R)-(+)-6-Methyl-4-oxabicyclo[8.4.1]pentadecan-3-one  | C15H26O2        | 1.115         | 334        | 6.379        | 139        | -0.32        | 414        | 887        | 356        | 1.373        | 0.353         | 223        | 1110        | 332        | 776        | 295        |
| 1,2-Dimethyldisulfane                                         | C2H6S2          | 0.731         | 265        | 6.411        | 142        | -0.46        | 445        | 852        | 334        | 1.137        | 0.117         | 191        | 1043        | 289        | 778        | 296        |
| <b>Pyroglutamic acid</b>                                      | <b>C5H7NO3</b>  | <b>0.579</b>  | <b>225</b> | <b>7.802</b> | <b>277</b> | <b>-0.12</b> | <b>364</b> | <b>866</b> | <b>346</b> | <b>0.937</b> | <b>-0.593</b> | <b>140</b> | <b>1006</b> | <b>266</b> | <b>781</b> | <b>297</b> |
| Methyl benzoate                                               | C8H8O2          | 1.081         | 328        | 6.008        | 102        | -0.32        | 418        | 848        | 330        | 1.617        | 0.087         | 261        | 1109        | 331        | 781        | 298        |
| Ribitol                                                       | C5H12O5         | 0.501         | 220        | 8.447        | 334        | 0.25         | 46         | 600        | 161        | 4.590        | -0.512        | 401        | 1001        | 259        | 781        | 299        |
| D-Glucuronic acid                                             | C6H10O7         | 0.147         | 189        | 8.417        | 333        | 0.19         | 99         | 621        | 166        | 2.674        | -2.939        | 351        | 972         | 243        | 783        | 300        |
| Chloro(methoxy)methane                                        | C2H5ClO         | 1.173         | 348        | 7.578        | 256        | -0.10        | 349        | 953        | 394        | 1.095        | 0.074         | 179        | 1132        | 353        | 784        | 301        |
| (5-Hydroxy-6-methylpyridine-3,4-diy)dimethanol                | C8H11NO3        | -0.194        | 136        | 7.753        | 273        | 0.01         | 278        | 687        | 208        | 1.467        | -1.594        | 235        | 922         | 212        | 786        | 302        |
| $\beta$ -DL-Arabinose                                         | C5H10O5         | -0.091        | 154        | 9.818        | 408        | 0.17         | 126        | 688        | 212        | 1.569        | -1.492        | 252        | 940         | 221        | 786        | 303        |
| <b>Succinamide</b>                                            | <b>C4H8N2O2</b> | <b>-0.517</b> | <b>83</b>  | <b>6.564</b> | <b>160</b> | <b>0.02</b>  | <b>270</b> | <b>513</b> | <b>123</b> | <b>2.813</b> | <b>-0.248</b> | <b>358</b> | <b>871</b>  | <b>186</b> | <b>788</b> | <b>304</b> |
| 3S-cis-3,6-Dimethyl-1,4-dioxane-2,5-dione                     | C6H8O4          | 1.994         | 418        | 7.948        | 288        | -0.06        | 313        | 1019       | 420        | 1.118        | 0.098         | 188        | 1207        | 392        | 789        | 305        |
| <b><i><math>\epsilon</math>-Caprolactam</i><sup>CSD</sup></b> | <b>C6H11NO</b>  | <b>0.606</b>  | <b>230</b> | <b>8.474</b> | <b>336</b> | <b>-0.07</b> | <b>328</b> | <b>894</b> | <b>363</b> | <b>0.870</b> | <b>-0.150</b> | <b>126</b> | <b>1020</b> | <b>276</b> | <b>790</b> | <b>306</b> |
| $\alpha$ -D-Glucose                                           | C6H12O6         | 0.224         | 195        | 8.607        | 349        | 0.17         | 124        | 668        | 195        | 2.232        | -1.340        | 320        | 988         | 252        | 793        | 307        |
| Butyramide                                                    | C4H9NO          | -1.093        | 12         | 7.100        | 205        | 0.00         | 280        | 497        | 117        | 2.140        | 0.100         | 310        | 807         | 163        | 795        | 308        |
| $\alpha$ -D-Talose                                            | C6H12O6         | -0.415        | 93         | 9.481        | 399        | 0.21         | 82         | 574        | 146        | 2.232        | -1.340        | 314        | 888         | 193        | 795        | 309        |
| 2,5-Piperazinedione                                           | C4H6N2O2        | 0.769         | 273        | 7.280        | 223        | -0.15        | 370        | 866        | 345        | 1.173        | 0.153         | 203        | 1069        | 307        | 796        | 310        |
| 4-Hydroxy-3,5-dimethoxybenzaldehyde                           | C9H10O4         | 0.764         | 272        | 7.595        | 260        | 0.01         | 275        | 807        | 298        | 1.621        | -0.930        | 262        | 1069        | 306        | 797        | 311        |
| DL-Arabinitol                                                 | C5H12O5         | 0.293         | 201        | 8.576        | 345        | 0.23         | 53         | 599        | 158        | 4.590        | -0.512        | 400        | 999         | 257        | 798        | 312        |
| Ethylene glycol                                               | C2H6O2          | -0.726        | 63         | 9.505        | 400        | 0.13         | 161        | 624        | 170        | 1.480        | -0.560        | 237        | 861         | 178        | 798        | 313        |
| 1,2-Dicyclopropylethane-1,2-dione                             | C8H10O2         | 1.469         | 387        | 6.049        | 105        | -0.20        | 386        | 878        | 352        | 2.200        | 0.159         | 311        | 1189        | 387        | 802        | 314        |
| Ethyl(methyl)sulfane                                          | C3H8S           | 0.633         | 238        | 6.637        | 166        | -0.40        | 431        | 835        | 323        | 1.185        | 0.164         | 205        | 1040        | 288        | 802        | 315        |
| D-Glucitol                                                    | C6H14O6         | 0.959         | 310        | 8.481        | 340        | 0.26         | 37         | 687        | 209        | 5.678        | -0.445        | 426        | 1113        | 333        | 803        | 316        |
| 2,2-Dibromo-2-cyanoacetamide                                  | C3H2Br2N2O      | 0.839         | 287        | 9.573        | 401        | 0.01         | 273        | 961        | 400        | 0.900        | -0.631        | 129        | 1090        | 321        | 803        | 317        |
| D-Iditol                                                      | C6H14O6         | 0.851         | 291        | 8.348        | 327        | 0.23         | 52         | 670        | 197        | 5.678        | -0.445        | 427        | 1097        | 326        | 806        | 318        |
| Cycloundecanone                                               | C11H20O         | 1.042         | 320        | 7.423        | 235        | -0.22        | 393        | 948        | 390        | 1.100        | 0.079         | 180        | 1128        | 350        | 808        | 319        |
| $\beta$ -D-Galactose                                          | C6H12O6         | 0.193         | 194        | 8.853        | 365        | 0.17         | 125        | 684        | 205        | 2.232        | -1.340        | 319        | 1003        | 262        | 809        | 320        |
| Adamantane-1,3,5,7-tetracarboxylic acid                       | C14H16O8        | -0.542        | 79         | 10.436       | 423        | 0.10         | 197        | 699        | 219        | 1.138        | -2.944        | 192        | 891         | 197        | 812        | 321        |
| Methyl cubane-1-carboxylate                                   | C10H10O2        | 1.027         | 318        | 7.179        | 211        | -0.33        | 420        | 949        | 391        | 1.100        | 0.080         | 182        | 1131        | 352        | 813        | 322        |
| 1,2-bis(Methylthio)ethane                                     | C4H10S2         | 0.676         | 246        | 5.435        | 61         | -0.44        | 440        | 747        | 255        | 2.222        | 0.181         | 313        | 1060        | 301        | 814        | 323        |

|                                          |                |               |            |              |            |              |            |            |            |              |               |            |             |            |            |            |
|------------------------------------------|----------------|---------------|------------|--------------|------------|--------------|------------|------------|------------|--------------|---------------|------------|-------------|------------|------------|------------|
| Glycerol                                 | C3H8O3         | -1.059        | 19         | 8.401        | 330        | 0.15         | 139        | 488        | 110        | 2.584        | -0.478        | 347        | 835         | 170        | 816        | 324        |
| Phenyl acetate                           | C8H8O2         | 1.177         | 350        | 6.283        | 125        | -0.34        | 421        | 896        | 364        | 1.640        | 0.110         | 271        | 1167        | 376        | 817        | 325        |
| <b>L-Aspartic acid</b>                   | <b>C4H7NO4</b> | <b>-1.076</b> | <b>14</b>  | <b>7.631</b> | <b>263</b> | <b>-0.06</b> | <b>317</b> | <b>594</b> | <b>156</b> | <b>1.490</b> | <b>-2.081</b> | <b>238</b> | <b>832</b>  | <b>169</b> | <b>818</b> | <b>326</b> |
| 4-Methylmorpholine                       | C5H11NO        | 1.668         | 405        | 8.164        | 307        | -0.21        | 389        | 1101       | 442        | 0.855        | -0.165        | 122        | 1223        | 394        | 818        | 327        |
| D-Altritol                               | C6H14O6        | 0.880         | 298        | 7.875        | 282        | 0.18         | 108        | 688        | 213        | 5.678        | -0.445        | 429        | 1117        | 338        | 819        | 328        |
| Cyclodecanone                            | C10H18O        | 1.144         | 341        | 7.428        | 239        | -0.17        | 379        | 959        | 397        | 1.164        | 0.143         | 202        | 1161        | 371        | 820        | 329        |
| L-Carvone                                | C10H14O        | 1.300         | 365        | 6.988        | 192        | -0.33        | 419        | 976        | 406        | 1.230        | 0.209         | 211        | 1187        | 385        | 822        | 330        |
| Biotin                                   | C10H16N2O3S    | -0.827        | 53         | 7.591        | 259        | 0.11         | 184        | 496        | 115        | 3.259        | -0.312        | 380        | 876         | 189        | 823        | 331        |
| 1,3-Distearoyl-2-oleoylglycerol          | C57H108O6      | 0.808         | 278        | 4.324        | 22         | -0.12        | 360        | 660        | 189        | 29.490       | 0.919         | 447        | 1107        | 328        | 829        | 332        |
| 1,1'-Azo-bis(carbamide)                  | C2H4N4O2       | -0.968        | 33         | 6.942        | 190        | 0.03         | 256        | 479        | 108        | 3.446        | -0.126        | 384        | 863         | 179        | 830        | 333        |
| Trimethylamine oxide                     | C3H9NO         | 1.777         | 414        | 10.536       | 426        | -0.11        | 359        | 1199       | 448        | -0.473       | -1.493        | 45         | 1244        | 404        | 830        | 334        |
| $\beta$ -D-Altropyranose                 | C6H12O6        | 0.332         | 208        | 10.329       | 420        | 0.20         | 94         | 722        | 232        | 2.232        | -1.340        | 317        | 1039        | 286        | 831        | 335        |
| Acetamide                                | C2H5NO         | -0.527        | 81         | 8.591        | 347        | -0.03        | 291        | 719        | 224        | 1.145        | 0.125         | 194        | 913         | 207        | 832        | 336        |
| bis(Methylthio)methane                   | C3H8S2         | 0.686         | 249        | 6.345        | 132        | -0.40        | 429        | 810        | 303        | 1.647        | 0.116         | 272        | 1082        | 316        | 833        | 337        |
| Dimethyl succinate                       | C6H10O4        | 1.420         | 381        | 5.487        | 68         | -0.24        | 397        | 846        | 329        | 3.159        | 0.098         | 371        | 1217        | 393        | 836        | 338        |
| 2-(Oleoyloxy)propane-1,3-diyl distearate | C57H108O6      | 0.816         | 280        | 4.097        | 16         | -0.15        | 373        | 669        | 196        | 29.490       | 0.919         | 448        | 1117        | 337        | 837        | 339        |
| Vitamin A acetate                        | C22H32O2       | 0.861         | 292        | 5.377        | 59         | -0.17        | 380        | 731        | 244        | 4.441        | 0.360         | 398        | 1129        | 351        | 837        | 340        |
| 1,3-Distearoyl-2-elaidoylglycerol        | C57H108O6      | 0.820         | 283        | 3.981        | 14         | -0.16        | 375        | 672        | 198        | 29.492       | 0.921         | 449        | 1121        | 344        | 838        | 341        |
| Tromethamine                             | C4H11NO3       | -0.883        | 46         | 9.340        | 392        | 0.23         | 56         | 494        | 114        | 3.921        | -0.161        | 390        | 884         | 191        | 838        | 342        |
| Cyclohexane-1,2,3,4,5,6-hexaol           | C6H12O6        | 1.132         | 338        | 9.808        | 407        | 0.19         | 96         | 841        | 327        | 2.551        | -1.020        | 338        | 1179        | 380        | 841        | 343        |
| <b>L-Proline</b>                         | <b>C5H9NO2</b> | <b>0.296</b>  | <b>203</b> | <b>8.042</b> | <b>296</b> | <b>-0.06</b> | <b>318</b> | <b>817</b> | <b>310</b> | <b>1.411</b> | <b>-0.119</b> | <b>228</b> | <b>1045</b> | <b>291</b> | <b>842</b> | <b>344</b> |
| 1,2-Distearoyl-3-elaidoylglycerol        | C57H108O6      | 0.847         | 289        | 3.769        | 10         | -0.22        | 390        | 689        | 214        | 29.408       | 0.837         | 446        | 1135        | 354        | 846        | 345        |
| Tetracyanoethylene                       | C6N4           | 2.818         | 444        | 7.093        | 204        | -0.14        | 369        | 1017       | 418        | 1.664        | 0.644         | 273        | 1290        | 417        | 846        | 346        |
| 2-Aminoethan-1-ol                        | C2H7NO         | -0.282        | 118        | 7.887        | 284        | 0.04         | 253        | 655        | 185        | 2.136        | 0.095         | 309        | 964         | 236        | 846        | 347        |
| Oxetane                                  | C3H6O          | 1.075         | 327        | 8.562        | 343        | -0.27        | 401        | 1071       | 435        | 0.701        | -0.319        | 103        | 1174        | 378        | 847        | 348        |
| Formamide                                | CH3NO          | -0.357        | 100        | 8.480        | 339        | -0.04        | 301        | 740        | 247        | 1.190        | 0.170         | 209        | 949         | 226        | 849        | 349        |
| Hexamethylenetetramine                   | C6H12N4        | 3.427         | 448        | 9.756        | 405        | -0.13        | 366        | 1219       | 449        | 0.479        | -0.541        | 83         | 1302        | 420        | 854        | 350        |
| Tramadol                                 | C16H25NO2      | -0.120        | 149        | 11.521       | 445        | 0.28         | 30         | 624        | 169        | 3.240        | 0.179         | 379        | 1003        | 261        | 854        | 351        |
| $\beta$ -L-Lyxopyranose                  | C5H10O5        | -0.019        | 166        | 8.964        | 374        | 0.06         | 237        | 777        | 282        | 1.524        | -1.027        | 247        | 1024        | 278        | 858        | 352        |
| Dibenzoyl peroxide                       | C14H10O4       | 1.563         | 402        | 5.736        | 82         | -0.28        | 405        | 889        | 357        | 3.176        | 0.115         | 372        | 1261        | 410        | 859        | 353        |
| 1,2-Diphenyldisulfane                    | C12H10S2       | 0.712         | 257        | 5.996        | 101        | -0.47        | 448        | 806        | 297        | 2.210        | 0.169         | 312        | 1118        | 341        | 861        | 354        |
| 5,5-Diethylbarbituric acid               | C8H12N2O3      | 1.413         | 378        | 10.038       | 413        | -0.03        | 290        | 1081       | 438        | 0.996        | -0.534        | 159        | 1240        | 402        | 862        | 355        |
| 1,2-Dibenzylsulfane                      | C14H14S2       | 0.704         | 254        | 4.991        | 45         | -0.45        | 443        | 742        | 250        | 3.199        | 0.138         | 376        | 1118        | 339        | 864        | 356        |



| <b>Urea</b>                                                               | <b>CH4N2O</b> | <b>-0.137</b> | <b>145</b> | <b>8.615</b> | <b>350</b> | <b>0.01</b> | <b>279</b> | <b>774</b> | <b>280</b> | <b>1.477</b> | <b>-0.054</b> | <b>236</b> | <b>1010</b> | <b>269</b> | <b>865</b> | <b>357</b> |
|---------------------------------------------------------------------------|---------------|---------------|------------|--------------|------------|-------------|------------|------------|------------|--------------|---------------|------------|-------------|------------|------------|------------|
| β-Tristearin                                                              | C57H110O6     | 0.815         | 279        | 3.699        | 9          | -0.30       | 409        | 697        | 216        | 30.039       | 0.958         | 450        | 1147        | 360        | 868        | 358        |
| β-D-Allose                                                                | C6H12O6       | 0.400         | 215        | 8.502        | 341        | 0.09        | 212        | 768        | 274        | 2.232        | -1.340        | 316        | 1084        | 318        | 869        | 359        |
| Morpholine                                                                | C4H9NO        | 1.110         | 333        | 8.985        | 375        | -0.11       | 358        | 1066       | 433        | 0.929        | -0.091        | 136        | 1202        | 390        | 869        | 360        |
| l-Iditol                                                                  | C6H14O6       | 0.984         | 313        | 9.055        | 377        | 0.22        | 64         | 754        | 260        | 5.678        | -0.445        | 428        | 1182        | 383        | 869        | 361        |
| Acetylmethionine                                                          | C7H13NO3S     | 0.189         | 192        | 8.165        | 309        | 0.12        | 178        | 679        | 203        | 3.347        | -0.735        | 383        | 1062        | 302        | 870        | 362        |
| Dichlorodifluoromethane                                                   | CCl2F2        | 0.819         | 282        | 7.114        | 207        | -0.36       | 424        | 913        | 375        | 1.498        | 0.478         | 242        | 1155        | 368        | 873        | 363        |
| Formaldehyde                                                              | CH2O          | 1.566         | 403        | 8.833        | 363        | -0.07       | 329        | 1095       | 439        | 1.100        | 0.080         | 181        | 1276        | 413        | 873        | 364        |
| Carbamazepine                                                             | C15H12N2O     | -0.250        | 128        | 7.584        | 258        | -0.15       | 372        | 758        | 266        | 1.520        | -0.010        | 244        | 1002        | 260        | 874        | 365        |
| (4R,7S)-7-Isopropyl-4-methylxepan-2-one                                   | C10H18O2      | 1.268         | 360        | 7.635        | 264        | -0.32       | 415        | 1039       | 425        | 1.150        | 0.129         | 196        | 1235        | 399        | 875        | 366        |
| Proline                                                                   | C5H9NO2       | 0.233         | 197        | 8.146        | 302        | -0.10       | 350        | 849        | 333        | 1.411        | -0.119        | 227        | 1076        | 313        | 879        | 367        |
| L-Ribose                                                                  | C5H10O5       | 0.056         | 178        | 8.779        | 361        | 0.14        | 151        | 690        | 215        | 3.083        | -1.509        | 367        | 1057        | 299        | 879        | 368        |
| 2-Methoxy-4-(1-(E)-propenyl)phenyl acetate                                | C12H14O3      | 1.208         | 351        | 6.107        | 111        | -0.32       | 416        | 878        | 353        | 2.716        | 0.165         | 353        | 1231        | 397        | 880        | 369        |
| n-Butyl acetate                                                           | C6H12O2       | 1.070         | 325        | 6.437        | 146        | -0.20       | 387        | 858        | 338        | 2.591        | 0.040         | 348        | 1206        | 391        | 881        | 370        |
| β-D-Fructopyranose                                                        | C6H12O6       | 0.465         | 219        | 10.242       | 417        | 0.10        | 204        | 840        | 325        | 1.639        | -1.933        | 267        | 1107        | 329        | 888        | 371        |
| 1-Chloro-1,1,2,2,2-pentafluoroethane                                      | C2ClF5        | 0.670         | 244        | 6.901        | 187        | -0.40       | 428        | 859        | 339        | 1.832        | 0.812         | 281        | 1140        | 355        | 896        | 372        |
| 1,4-Dithiane                                                              | C4H8S2        | 0.699         | 253        | 7.531        | 252        | -0.43       | 438        | 943        | 387        | 1.190        | 0.169         | 208        | 1151        | 364        | 898        | 373        |
| Diphenyl ether                                                            | C12H10O       | 0.704         | 255        | 6.819        | 180        | -0.46       | 446        | 881        | 355        | 1.675        | 0.145         | 274        | 1155        | 367        | 900        | 374        |
| 3α,4,7,7-Tetramethyl-(3αR,4S,6αR,10αS)-perhydronaphtho(8α,1-β)furan-2-one | C16H26O2      | 1.252         | 356        | 8.247        | 319        | -0.22       | 391        | 1066       | 432        | 1.160        | 0.139         | 198        | 1264        | 411        | 908        | 375        |
| α-Lactose                                                                 | C12H22O11     | 1.398         | 376        | 8.590        | 346        | 0.15        | 145        | 867        | 348        | 5.660        | -0.973        | 419        | 1286        | 414        | 910        | 376        |
| 1,3-Diphenylpropan-2-one                                                  | C15H14O       | 1.095         | 330        | 6.471        | 150        | -0.31       | 410        | 890        | 359        | 2.679        | 0.128         | 352        | 1242        | 403        | 912        | 377        |
| 1,2-Dimethoxybenzene                                                      | C8H10O2       | 0.832         | 285        | 7.246        | 216        | -0.39       | 426        | 927        | 381        | 1.639        | 0.109         | 270        | 1197        | 389        | 912        | 378        |
| (-)-1,3,3-Trimethyl-2-norbornanone                                        | C10H16O       | 1.162         | 344        | 8.273        | 321        | -0.20       | 385        | 1050       | 428        | 1.185        | 0.165         | 206        | 1256        | 406        | 912        | 379        |
| Tricyclopropylamine                                                       | C9H15N        | 0.623         | 234        | 7.300        | 226        | -0.22       | 394        | 854        | 336        | 2.060        | 0.019         | 295        | 1149        | 363        | 915        | 380        |
| D-Arabinitol                                                              | C5H12O5       | 0.313         | 206        | 8.576        | 344        | 0.12        | 173        | 723        | 233        | 4.590        | -0.512        | 399        | 1122        | 345        | 916        | 381        |
| Sucralose                                                                 | C12H19Cl3O8   | -0.224        | 131        | 8.879        | 369        | 0.13        | 158        | 658        | 187        | 4.008        | -1.604        | 392        | 1050        | 293        | 919        | 382        |
| 2-Hydroxyacetamide                                                        | C2H5NO2       | -0.763        | 60         | 8.644        | 353        | 0.03        | 261        | 674        | 199        | 2.129        | 0.088         | 306        | 980         | 247        | 920        | 383        |
| Eucalyptol                                                                | C10H18O       | 0.936         | 306        | 8.203        | 310        | -0.40       | 433        | 1049       | 427        | 1.094        | 0.074         | 178        | 1227        | 395        | 921        | 384        |
| α,α-Galacto-trehalose                                                     | C12H22O11     | 1.463         | 386        | 9.447        | 398        | 0.18        | 114        | 898        | 369        | 5.154        | -1.478        | 410        | 1308        | 423        | 922        | 385        |
| L-Cystine                                                                 | C6H12N2O4S2   | -0.793        | 57         | 6.988        | 193        | -0.07       | 330        | 580        | 150        | 4.591        | -1.531        | 403        | 983         | 248        | 926        | 386        |
| DL-Arginine                                                               | C6H14N4O2     | 1.693         | 407        | 7.091        | 202        | -0.06       | 314        | 923        | 379        | 5.192        | 0.090         | 412        | 1335        | 430        | 928        | 387        |

|                                                                          |                |               |            |               |            |              |            |             |            |              |               |            |             |            |             |            |
|--------------------------------------------------------------------------|----------------|---------------|------------|---------------|------------|--------------|------------|-------------|------------|--------------|---------------|------------|-------------|------------|-------------|------------|
| Sucrose                                                                  | C12H22O11      | 0.544         | 223        | 9.402         | 396        | 0.19         | 105        | 724         | 235        | 6.173        | -0.969        | 435        | 1159        | 370        | 936         | 388        |
| myo-Inositol                                                             | C6H12O6        | 0.914         | 300        | 9.272         | 387        | 0.09         | 210        | 897         | 367        | 2.551        | -1.020        | 341        | 1238        | 400        | 938         | 389        |
| β-D-Gulose                                                               | C6H12O6        | 0.097         | 180        | 9.658         | 402        | 0.08         | 221        | 803         | 295        | 2.232        | -1.340        | 315        | 1118        | 340        | 938         | 390        |
| (S)-2-Hydroxypropanamide                                                 | C3H7NO2        | -0.969        | 31         | 9.312         | 389        | 0.05         | 243        | 663         | 192        | 2.130        | 0.089         | 308        | 971         | 239        | 940         | 391        |
| o-β-D-Mannopyranosyl-(1-4)-α-D-mannopyranose                             | C12H22O11      | 0.330         | 207        | 8.411         | 332        | 0.11         | 191        | 730         | 239        | 5.660        | -0.973        | 418        | 1148        | 361        | 941         | 392        |
| 1,3,5-Trinitrobenzene                                                    | C6H3N3O6       | 2.279         | 432        | 7.443         | 242        | -0.28        | 403        | 1077        | 437        | 2.069        | 0.028         | 298        | 1375        | 440        | 943         | 393        |
| (3αR,4R,6αS,10αS)-3α,4,7,7-Tetramethylperhydronaphtho(8α,1-β)furan-2-one | C16H26O2       | 1.220         | 352        | 8.882         | 370        | -0.16        | 374        | 1096        | 440        | 1.160        | 0.139         | 199        | 1295        | 418        | 943         | 394        |
| β-D-Psicose                                                              | C6H12O6        | -0.148        | 144        | 9.360         | 393        | 0.09         | 207        | 744         | 254        | 2.627        | -1.454        | 349        | 1093        | 323        | 949         | 395        |
| Nitromethane                                                             | CH3NO2         | 1.515         | 393        | 10.093        | 415        | -0.08        | 342        | 1150        | 447        | 1.163        | 0.143         | 201        | 1351        | 437        | 958         | 396        |
| D-Mannitol                                                               | C6H14O6        | 0.891         | 299        | 8.652         | 355        | 0.12         | 174        | 828         | 318        | 5.678        | -0.445        | 430        | 1258        | 408        | 959         | 397        |
| (R)-2-Hydroxypropanamide                                                 | C3H7NO2        | -0.974        | 30         | 9.312         | 388        | 0.03         | 264        | 682         | 204        | 2.130        | 0.089         | 307        | 989         | 253        | 959         | 398        |
| Muco-inositol                                                            | C6H12O6        | 1.367         | 373        | 10.461        | 425        | 0.10         | 194        | 992         | 411        | 2.551        | -1.020        | 345        | 1337        | 431        | 964         | 399        |
| 4-Allyl-2-methoxyphenyl benzoate                                         | C17H16O3       | 1.117         | 335        | 6.602         | 162        | -0.32        | 417        | 914         | 376        | 3.750        | 0.178         | 389        | 1303        | 421        | 968         | 400        |
| β-Maltose                                                                | C12H22O11      | 1.858         | 415        | 8.751         | 358        | 0.11         | 193        | 966         | 401        | 5.660        | -0.973        | 421        | 1387        | 441        | 972         | 401        |
| Ethylene oxide                                                           | C2H4O          | 1.043         | 321        | 9.084         | 379        | -0.40        | 432        | 1132        | 444        | 1.030        | 0.010         | 163        | 1295        | 419        | 974         | 402        |
| <b>DL-Aspartic acid</b>                                                  | <b>C4H7NO4</b> | <b>-0.241</b> | <b>130</b> | <b>9.899</b>  | <b>411</b> | <b>-0.07</b> | <b>325</b> | <b>866</b>  | <b>344</b> | <b>1.490</b> | <b>-2.081</b> | <b>239</b> | <b>1105</b> | <b>327</b> | <b>975</b>  | <b>403</b> |
| n-Methyl-D-glucamine                                                     | C7H17NO5       | 0.398         | 214        | 8.620         | 351        | 0.11         | 190        | 755         | 263        | 5.812        | -0.310        | 434        | 1189        | 386        | 975         | 404        |
| L-Cysteine                                                               | C3H7NO2S       | -0.425        | 91         | 11.731        | 446        | 0.06         | 234        | 771         | 277        | 2.091        | -0.970        | 304        | 1075        | 312        | 984         | 405        |
| (3αR,4S,6αS,10αS)-3α,4,7,7-Tetramethylperhydronaphtho(8α,1-β)furan-2-one | C16H26O2       | 1.244         | 355        | 9.339         | 391        | -0.23        | 395        | 1141        | 445        | 1.160        | 0.139         | 200        | 1341        | 436        | 986         | 406        |
| β-Cellobiose                                                             | C12H22O11      | 1.102         | 332        | 7.892         | 286        | -0.01        | 285        | 903         | 371        | 5.660        | -0.973        | 417        | 1320        | 426        | 988         | 407        |
| Caryophyllen-α-oxide                                                     | C15H24O        | 0.875         | 295        | 8.372         | 328        | -0.47        | 447        | 1070        | 434        | 1.265        | 0.244         | 216        | 1286        | 416        | 991         | 408        |
| D-Threonine                                                              | C4H9NO3        | -1.079        | 13         | 10.997        | 435        | -0.07        | 327        | 775         | 281        | 1.452        | -1.610        | 232        | 1007        | 267        | 994         | 409        |
| α,α-Trehalose                                                            | C12H22O11      | 1.746         | 412        | 10.610        | 428        | 0.13         | 170        | 1010        | 417        | 5.154        | -1.478        | 409        | 1419        | 445        | 1007        | 410        |
| DL-Tyrosine                                                              | C9H11NO3       | -1.018        | 21         | 8.408         | 331        | -0.10        | 352        | 704         | 221        | 2.378        | -1.193        | 327        | 1031        | 282        | 1010        | 411        |
| 2,2',2''-Nitrilotriethanol                                               | C6H15NO3       | -0.777        | 59         | 8.651         | 354        | 0.04         | 249        | 662         | 191        | 4.985        | -0.117        | 408        | 1070        | 308        | 1011        | 412        |
| Diallylsulfide                                                           | C6H10S         | 0.624         | 236        | 7.251         | 218        | -0.44        | 442        | 896         | 365        | 2.763        | 0.212         | 354        | 1250        | 405        | 1014        | 413        |
| β-Lactose                                                                | C12H22O11      | 1.073         | 326        | 9.109         | 382        | 0.09         | 213        | 921         | 378        | 5.660        | -0.973        | 420        | 1341        | 434        | 1015        | 414        |
| L-Threonine                                                              | C4H9NO3        | -1.013        | 23         | 11.032        | 437        | -0.10        | 353        | 813         | 307        | 1.452        | -1.610        | 233        | 1046        | 292        | 1023        | 415        |
| <b>Glycine</b>                                                           | <b>C2H5NO2</b> | <b>0.914</b>  | <b>301</b> | <b>10.689</b> | <b>430</b> | <b>-0.04</b> | <b>302</b> | <b>1033</b> | <b>423</b> | <b>2.050</b> | <b>0.010</b>  | <b>293</b> | <b>1326</b> | <b>427</b> | <b>1025</b> | <b>416</b> |
| D-Alanine                                                                | C3H7NO2        | 0.634         | 239        | 11.863        | 449        | -0.04        | 300        | 988         | 408        | 1.945        | -0.096        | 288        | 1276        | 412        | 1037        | 417        |
| DL-Valine                                                                | C5H11NO2       | -0.362        | 99         | 11.017        | 436        | -0.02        | 286        | 821         | 315        | 2.269        | -0.282        | 322        | 1143        | 356        | 1044        | 418        |

|                                           |                  |               |            |               |            |              |            |             |            |              |               |            |             |            |             |            |
|-------------------------------------------|------------------|---------------|------------|---------------|------------|--------------|------------|-------------|------------|--------------|---------------|------------|-------------|------------|-------------|------------|
| L-Tryptophan                              | C11H12N2O2       | -0.698        | 67         | 9.406         | 397        | -0.06        | 319        | 783         | 284        | 2.421        | -0.640        | 332        | 1115        | 335        | 1048        | 419        |
| Tetrabromomethane                         | CBr4             | 0.935         | 305        | 8.476         | 338        | -0.35        | 423        | 1066        | 431        | 1.950        | 0.930         | 290        | 1356        | 438        | 1051        | 420        |
| 4-Hydroxy-L-proline                       | C5H9NO3          | 0.839         | 286        | 10.560        | 427        | -0.10        | 348        | 1061        | 430        | 1.701        | -0.340        | 276        | 1337        | 432        | 1051        | 421        |
| L-Tyrosine                                | C9H11NO3         | -1.010        | 24         | 8.756         | 359        | -0.13        | 367        | 750         | 258        | 2.378        | -1.193        | 328        | 1078        | 314        | 1054        | 422        |
| DL-Cysteine                               | C3H7NO2S         | -0.015        | 168        | 10.406        | 422        | -0.09        | 346        | 936         | 385        | 2.091        | -0.970        | 302        | 1238        | 401        | 1070        | 423        |
| <b>L-Alanine</b>                          | <b>C3H7NO2</b>   | <b>0.612</b>  | <b>232</b> | <b>11.851</b> | <b>448</b> | <b>-0.08</b> | <b>338</b> | <b>1018</b> | <b>419</b> | <b>1.945</b> | <b>-0.096</b> | <b>289</b> | <b>1307</b> | <b>422</b> | <b>1075</b> | <b>424</b> |
| β-galactose                               | C12H22O11        | 1.157         | 343        | 8.860         | 366        | -0.02        | 287        | 996         | 412        | 5.665        | -2.498        | 423        | 1419        | 444        | 1076        | 425        |
| (Z)-Ethyl 2-benzylidene-3-oxobutanoate    | C13H14O3         | 1.540         | 397        | 8.095         | 300        | -0.29        | 406        | 1103        | 443        | 3.185        | 0.123         | 373        | 1476        | 449        | 1079        | 426        |
| α-Maltose                                 | C12H22O11        | 0.954         | 309        | 9.964         | 412        | 0.05         | 245        | 966         | 402        | 5.660        | -0.973        | 422        | 1388        | 442        | 1079        | 427        |
| Diallyldisulfide                          | C6H10S2          | 0.719         | 261        | 7.705         | 269        | -0.44        | 441        | 971         | 404        | 3.146        | 0.084         | 370        | 1341        | 435        | 1080        | 428        |
| DL-Tryptophan                             | C11H12N2O2       | -0.569        | 77         | 9.696         | 403        | -0.10        | 351        | 831         | 322        | 2.421        | -0.640        | 331        | 1162        | 372        | 1085        | 429        |
| DL-Methionine                             | C5H11NO2S        | 0.675         | 245        | 9.338         | 390        | -0.06        | 315        | 950         | 392        | 3.291        | -0.281        | 381        | 1331        | 429        | 1086        | 430        |
| DL-Isoleucine                             | C6H13NO2         | 0.020         | 173        | 10.719        | 431        | -0.03        | 293        | 897         | 368        | 2.887        | -0.175        | 362        | 1259        | 409        | 1086        | 431        |
| L-Cysteine                                | C3H7NO2S         | -0.425        | 92         | 11.731        | 447        | -0.08        | 339        | 878         | 351        | 2.091        | -0.970        | 303        | 1181        | 381        | 1089        | 432        |
| L-Leucine                                 | C6H13NO2         | 0.598         | 227        | 11.040        | 439        | -0.03        | 295        | 961         | 399        | 2.794        | -0.267        | 357        | 1318        | 425        | 1091        | 433        |
| DL-Leucine                                | C6H13NO2         | 0.535         | 221        | 11.275        | 444        | -0.03        | 294        | 959         | 398        | 2.794        | -0.267        | 355        | 1314        | 424        | 1093        | 434        |
| L-Methionine                              | C5H11NO2S        | 0.619         | 233        | 10.348        | 421        | -0.04        | 303        | 957         | 396        | 3.291        | -0.281        | 382        | 1339        | 433        | 1106        | 435        |
| DL-Glutamine                              | C5H10N2O3        | -1.129        | 6          | 9.799         | 406        | -0.05        | 308        | 720         | 227        | 4.029        | -0.052        | 393        | 1113        | 334        | 1107        | 436        |
| <b>L-Valine</b>                           | <b>C5H11NO2</b>  | <b>0.426</b>  | <b>217</b> | <b>10.853</b> | <b>433</b> | <b>-0.10</b> | <b>354</b> | <b>1004</b> | <b>413</b> | <b>2.269</b> | <b>-0.282</b> | <b>323</b> | <b>1327</b> | <b>428</b> | <b>1110</b> | <b>437</b> |
| 4-Aminobutanoic acid                      | C4H9NO2          | 0.879         | 297        | 11.266        | 443        | -0.05        | 309        | 1049        | 426        | 2.880        | -0.182        | 360        | 1409        | 443        | 1112        | 438        |
| D-Isoleucine                              | C6H13NO2         | -0.268        | 122        | 10.215        | 416        | -0.08        | 336        | 874         | 349        | 2.887        | -0.175        | 361        | 1235        | 398        | 1113        | 439        |
| 4-tert-Butyl-3-methoxy-2,6-dinitrotoluene | C12H16N2O5       | 1.265         | 359        | 9.115         | 383        | -0.29        | 407        | 1149        | 446        | 2.285        | 0.244         | 324        | 1473        | 448        | 1114        | 440        |
| D-Asparagine                              | C4H8N2O3         | -0.858        | 48         | 9.825         | 409        | -0.08        | 334        | 791         | 291        | 3.189        | -0.383        | 374        | 1165        | 374        | 1117        | 441        |
| DL-Glutamic acid                          | C5H9NO4          | -0.031        | 164        | 11.033        | 438        | -0.05        | 307        | 909         | 374        | 3.235        | -0.846        | 377        | 1286        | 415        | 1122        | 442        |
| Neotame                                   | C20H30N2O5       | 1.062         | 323        | 9.103         | 381        | -0.04        | 304        | 1008        | 415        | 6.689        | -0.454        | 438        | 1446        | 447        | 1123        | 443        |
| L-Asparagine                              | C4H8N2O3         | -0.672        | 69         | 10.755        | 432        | -0.06        | 316        | 817         | 309        | 3.189        | -0.383        | 375        | 1192        | 388        | 1123        | 444        |
| β-Alanine                                 | C3H7NO2          | 0.869         | 293        | 11.217        | 441        | -0.08        | 343        | 1077        | 436        | 2.642        | 0.091         | 350        | 1427        | 446        | 1134        | 445        |
| DL-Serine                                 | C3H7NO3          | -0.269        | 121        | 12.315        | 450        | -0.11        | 357        | 928         | 382        | 2.386        | -0.675        | 329        | 1257        | 407        | 1136        | 446        |
| L-α-Leucine                               | C6H13NO2         | 0.598         | 228        | 11.040        | 440        | -0.08        | 341        | 1009        | 416        | 2.794        | -0.267        | 356        | 1365        | 439        | 1137        | 447        |
| <b>Glutamic acid</b>                      | <b>C5H9NO4</b>   | <b>-0.504</b> | <b>85</b>  | <b>11.224</b> | <b>442</b> | <b>-0.07</b> | <b>326</b> | <b>853</b>  | <b>335</b> | <b>3.235</b> | <b>-0.846</b> | <b>378</b> | <b>1231</b> | <b>396</b> | <b>1146</b> | <b>448</b> |
| <b>L-Glutamine</b>                        | <b>C5H10N2O3</b> | <b>-1.014</b> | <b>22</b>  | <b>10.680</b> | <b>429</b> | <b>-0.08</b> | <b>340</b> | <b>791</b>  | <b>293</b> | <b>4.029</b> | <b>-0.052</b> | <b>394</b> | <b>1185</b> | <b>384</b> | <b>1163</b> | <b>449</b> |
| Sucrose octa-acetate                      | C28H38O19        | 2.384         | 437        | 9.890         | 410        | -0.16        | 376        | 1223        | 450        | 11.476       | 0.251         | 445        | 1668        | 450        | 1231        | 450        |

Table S8 – Distribution of some frequent chemical groups in the database of 450 structures used in the theoretical screening and in the 76 molecules tested to form multicomponent with NVP.

| Chemical Groups                     | <chem>NC(=O)O</chem> |     | <chem>NC(=O)C</chem> |      | <chem>NC(=O)N</chem> |     | <chem>N</chem>      |     | <chem>OC(=O)C</chem> |      | <chem>O</chem>      |      | <chem>c1ccccc1</chem> |      | <chem>c1ccncc1</chem> |     |
|-------------------------------------|----------------------|-----|----------------------|------|----------------------|-----|---------------------|-----|----------------------|------|---------------------|------|-----------------------|------|-----------------------|-----|
|                                     | N <sup>o</sup> mol.  | %   | N <sup>o</sup> mol.  | %    | N <sup>o</sup> mol.  | %   | N <sup>o</sup> mol. | %   | N <sup>o</sup> mol.  | %    | N <sup>o</sup> mol. | %    | N <sup>o</sup> mol.   | %    | N <sup>o</sup> mol.   | %   |
| Total sample of 450 co-formers      | 34                   | 7.6 | 17                   | 3.8  | 13                   | 2.9 | 25                  | 5.6 | 97                   | 21.6 | 161                 | 35.8 | 126                   | 28   | 18                    | 4   |
| 76 co-formers experimentally tested | 7                    | 9.2 | 8                    | 10.5 | 6                    | 7.9 | 0                   | 0   | 32                   | 42.1 | 26                  | 34.2 | 27                    | 35.5 | 2                     | 2.6 |

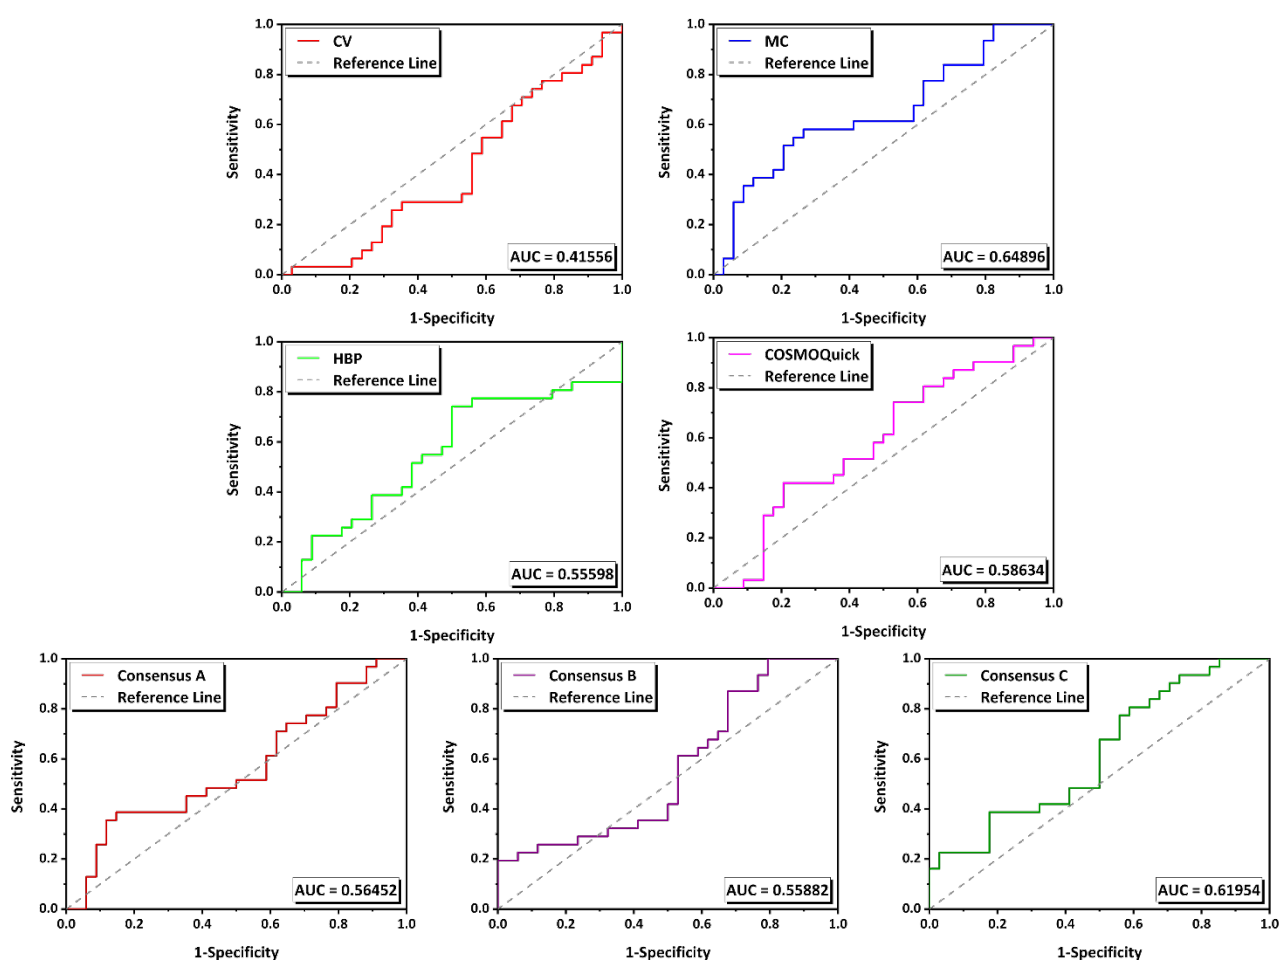

Figure S1 –ROC curves and AUC values obtained for each method: CV, MC, HBP, COSMOQuick, and the three consensus A, B and C.
